# Supplementary material for: Integrating adaptation pathways and Ostrom’s framework for sustainable governance of social-ecological systems in a changing world
Source: PeerJ journal article supplement (doi:10.7717/peerj.18938), 2025-02-24
Supplement: FileS1.zip [file Interview.Guide.English.pdf › Interview.Guide.English.pdf]

## **(Semi-)Structured Interview Guide**

(the unstructured part of the interviews can be shared on demand for actors who signed the sharing-consent agreement)

### **I. Objectives of the guide**

| <b>Objectives of the interview guide</b>                                                                                          | <b>Associated questions</b> |
|-----------------------------------------------------------------------------------------------------------------------------------|-----------------------------|
| Knowing and quantifying ecosystem services and disservices (ES+/ES-) of importance to the actor                                   | 2. a) b)<br>3.              |
| Describe the current state in terms of hedgerow types (variables used for modeling) and the viability of this state for the actor | 4. a) b)                    |
| Understand the actor's preferences regarding hedgerow types + their spatial distribution                                          | 5. 6. 7.                    |
| Assess the capacity and levers of action of the actor on the hedgerow network                                                     | 8.                          |
| Probe the preferences of the actors among several land use                                                                        | 12. a) b)                   |
| Investigate the actions considered in relation to each scenario                                                                   | 12. c) d)                   |
| Identify perceived vulnerabilities and risks related to climate change on the territory                                           | 9. 10.                      |
| Identify the presence or absence of individual and collective adaptation strategies in response to these vulnerabilities          | 11.                         |

### **II. Targetted Audience**

|                                                                                                                              |
|------------------------------------------------------------------------------------------------------------------------------|
| Farmers                                                                                                                      |
| Elected officials of the municipalities (primarily La Sauvetat, Veyre-Monton, Saint-Saturnin, and Manglieu) and Mond'Arverne |
| Residents and associations (through field meetings and contacts)                                                             |
| Mission officers of the Territorial communities                                                                              |
| NGO « Mission Haie Auvergne »                                                                                                |
| Conservatory of Natural Areas of Auvergne (Conservatoire des Espaces Naturels d'Auvergne)                                    |
| NGO « Terre de Liens »                                                                                                       |

### III. Materials Used

- Illustrated descriptive sheets presenting different ecosystem services and disservices
- Series of photos of hedges in the area, corresponding to the six variables of the modeling (no hedgerows, species rich, species poor, low, tall, punctuated, old, young, tree alignments)
- Maps of the selected sub-territories (optional)
- Quantitative scale of importance of ecosystem services and disservices
- Scale of presence by hedgerow type
- Illustrated descriptive sheets of different scenarios of land-use, climate change and collective action

### IV. Série de questions

Introduction : Short presentation of the interview framework and the project.

- Research project to develop a tool for territorial decision-making support (in the form of a computer model) related to ecosystem adaptation to global change
- The study area is the Mond'Arverne Community of Communes, with four targeted municipalities
- Initially, testing of the modeling tool on hedgerows and an opportunity for a first contact with local actors, especially to address other themes related to the project (scenarios)

#### **A. The ecosystem services of interest related to hedgerows and their min/max delivery**

1. [Not for elected officials] Here are the four municipalities that we are studying as part of our project [Show municipality maps].

a) Can you tell me if you live, work, or regularly visit each of these areas? If yes, for what reasons?

[Identification of the connection to the study area(s)]

[...]

b) [If multiple answers] For which use and which municipality do you feel most comfortable discussing hedgerow management?

[...]

The following questions will therefore focus exclusively on the municipality you just mentioned, in your capacity as [...].

2. I will present several sheets, each corresponding to a function fulfilled by hedges or nuisances [show ES sheets]. I let you read them.

a) Can you rank these features and drawbacks according to the importance you attribute to them?  
*[show the scale]. [identification of important ES and their quantification]*

b) Which functions (ES) do you consider particularly important to preserve?

3. Are there any other functions provided by the hedgerows that are not included in these sheets?  
*[Search for a comprehensive view of ES+ and ES- of interest to the actor]*

4. I will now show you a series of photos representing different types of hedgerows *[Show the photos and explain the different types of hedgerows]*.

a) Among these photos, which ones are closest to the hedgerow network you can observe in the municipality of [...] or Mond'Arverne? Do these types of hedgerows seem satisfactory to you?

[...]

b) Do you think it allows for the functions related to hedges that you consider to be the most important?  
*[State them again, maximum 3 ES].*

*[Survey of the viability of the current state]*

[...]

5. Now, can you set aside the photos that do not reflect your preferences at all regarding hedgerows, and leave those that you find satisfactory?

*[Survey of unacceptable states]*

[...]

6. For the remaining photos, can you rank them in order of your preferences?  
*[Minimum and maximum bounds of the ES satisfaction space variables]*

7. What would be the ideal distribution of the different types of hedgerows in the municipality, excluding urban areas? *[Classify using the presence/absence scale]*  
*[Minimum and maximum bounds of the hedgerow state variables]*

8. Do you feel capable of acting to ensure the functions related to hedges that we have discussed? If yes, how? If no, why?  
*[Control space variables]*

## **B. Vulnerabilities and adaptation strategies to climate change :**

9. Do you think your territory is vulnerable to climate change? If yes, what events or observations lead you to believe this?  
*[Perception of current risks]*

10. What future risks related to climate change do you anticipate at the territorial level?

*[Perception of future risks]*

**11.** In response to these risks, would you take any specific actions on a personal level? If yes, what? What would you like to see implemented or be ready to participate to at a collective level?

*[Adaptation strategies]*

### **C. Land-Use Scenarios**

**12.** Here are several land use scenarios based on several institutional documents from the Mond'Arverne Community of Communes [show the scenario sheets and explain them one by one, with the data sources].

- a) Among them, are there any scenarios that you would not want to see realized in the territorial?
- b) Which one, or ones, do you consider to be the most important to implement? Why?
- c) What individual and collective actions do you consider a priority to implement to achieve this/these scenario(s)?
- d) What individual and collective actions do you think can address multiple scenarios at the same time?
