# Supplementary material for: Integrating adaptation pathways and Ostrom’s framework for sustainable governance of social-ecological systems in a changing world
Source: PeerJ journal article supplement (doi:10.7717/peerj.18938), 2025-02-24
Supplement: FileS1.zip [file Supplementary.S1.SESF.Analysis.xlsx]

## Sheet: 4th.tier.SES.Analysis
Attributes from the SES Framework		Study sites & contrasts		Targets of adaptation
Social, Economic and Political settings (S)		Rural (La Sauvetat: 45° 38’ N, 3° 10’ E)	Peri-urban (Veyre-Monton: : 45° 38’ N, 3° 10’ E)
S1	Economic development	Not analyzed	Not analyzed
S2	Demographic trends	706 inhabitants (2020). Slow growing population since 1946 (482 inhabitants). Density 88 inhab./km2 https://fr.wikipedia.org/wiki/La_Sauvetat_(Puy-de-Dôme)#Démographie	3 664 inhabitants (2020). Faster growing population 1956 (765 inhabitants). Density 303 inhab/km2
-	S2.7.1: Inflow & outflow of people from and to Exploitation	Not analyzed	Not analyzed
-	S2.7.2: Inflow & outflow from and to Conservation	Not analyzed	Not analyzed
-	S2.7.3: Inflow & outflow from and to Policy-Making	Not analyzed	Not analyzed
S3	Political stability (rate of political change)	Same mayor since 2001	New mayor since 2020. Same political party since 1995.
S4	Other governance systems	Same mayor since 2001	New mayor since 2020. Same political party since 1995.
S5	Markets	Not analyzed, but a priori no local market associated with ecosystem services associated with local hedgerows. Market for wood chips is being developed	tourism in this area associated with landscape aesthetics. Market for wood chips is being developed
S6	Media organizations	Not enough data	Not enough data
S7	Technology
-	S7.7.1: New technologies from outside the SES for Exploitation (production, appropriation, transformation, use of resource units)	Not analyzed here (e.g. Precision agriculture tools, sensor networks, remote monitoring and control systems)
-	S7.7.2: New technologies from outside the SES for Conservation (provision, support, regulation, maintenance, adaptation of the resource infrastructure and access to resource units)	Not analyzed here (e.g. Precision agriculture tools, sensor networks, remote monitoring and control systems could support hedgerow network activities)
-	S7.7.3: New technologies from outside the SES for Policy-Making including the DAPP process (e.g. deliberation, decision-making and monitoring the state of Conservation and Exploitation)	Not analyzed here (e.g. New technologies that may be coming to better involve/inform local inhabitants and incentivise the creation of auxiliary groups to support hedgerows (e.g. social networks, local referendum ….)
Resource Systems (RS) / Resource species & infrastructures (RI)
RS1	Sector	Rural activities (farming mostly)	Multi-functional (Agricultural, forest, recreational,… )
RS2	Clarity of system boundaries
-	RS2.1: Ecologically defined boundaries of the resource system
-	RS2.2: Geographic boundary of the Exploitation (i.e., production, appropriation, transformation and use of resource units)	Complex property right system. Each hedgerows is owned by a farmer. But hedgerows provide simultaneously public, private, common-pool and club goods and services that do not necessarily match property rights and geographic boundaries of the areas (ex: )
-	RS2.3: Geographic boundary of the Conservation (provision, support, regulation, maintenance of the resource infrastructure and access to resource units)	In rural SES of La Sauvetat, resource users and governing actors are currently mostly located within the geographic boundaries (resource infrastructure boundary = ES supply boundary = governance boundary.	In the peri-urban SES Veyre-Monton, some resource users who benefit from some ES or are involved in decision making live outside the geographic boundaries.
RS3	Size of resource system
-	RS3.1 Extent of resource system in geographic area (Vogt et al., 2015)	Area (ha) of the study sites: 798 ha. Length of the hedgerow networks for both sites: 22164 m (1946), 20668 m (1989), 19889 m (2000), 21121 (2019)	Area (ha) of the study sites: 1211 ha. Length of the hedgerow networks for both sites: 33507 m (1946), 28045 m (1989), 28619 m (2000), 33677 (2019)
-	RS3.2 Resource system shape or configuration (e.g. edge to interior ratio) (Vogt et al., 2015)	Hedgerows are linear elements (min length 10m, max width 15m, gap length max 5m). 4 types of hedgerows defined according to two height criteria (~2m and ≥4 m tall) and two levels of species richness)
-	RS3.3 Fragmentation dynamics (Vogt et al., 2015)	Hedgerow networks are by nature very fragmented
-	RS3.4 Size of different types of ecological infrastructures within the resource system (Vogt et al., 2015)
RS4	Human constructed facilities (can include semi-natural facilities)*	farm buildings, roads, tracks, residential houses (low density)	farm buildings, roads, tracks, houses (high density)
-	RS4.1 Human constructed facilities involved in Exploitation activities (i.e., appropriation, production, transformation and use of resource units)	Not needed	Not needed
-	RS4.2 supporting human constructed facilities involved in Conservation activities (provision, support, regulation, maintenance of the resource system and access to resource units)	Not needed	Not needed
'	RS4.2.1 Providing resource supporting services, e.g. of ecological movement (e.g., sewage outflows, species corridors) or other ecological processes (e.g. pollination of main resource infrastructure)	Not needed	Not needed
	RS4.2.2 Providing resource regulating services, e.g. to ecological movement (e.g. dams, fences, roads) or other ecological process (e.g. control of pests impacting main resource infrastructure)
	RS4.2.3 Providing regulating service directly on the flow of resource units from the resource infrastructure to the resource user (e.g. regulate landslide, break wind, )
RS5	Productivity of the system	Landsat/photo aerial data (1946, 1989, 2000, 2019)→ GIS analysis of hedgerow composition (5 states of hedgerows), distribution and dynamics→ Markovian state transition model
-	RS5.1 Dynamics of resource infrastructures (e.g. forest area/biomass growth/replacement rates, transition between ecological stages)	Evolution of the total size of the hedgerow network: 22164 m (1946), 20668 m (1989), 19889 m (2000), 21121 (2019).	Evolution of the total size of the hedgerow network: 33507 m (1946), 28045 m (1989), 28619 m (2000), 33677 (2019)
-	RS5.2 Chemical resource dynamics (e.g. water, light, nutrient availability)	Not analyzed	Not analyzed
-	RS5.3 Intrinsic resource species dynamics (population growth, species/community composition growth, growth or diversification, state transitions between life-stages / age / size classes)	Not analyzed	Not analyzed
RS6	Equilibrium properties
-	RS6.1 Existence of a desired stable state (attractor), successful stage/trajectory	Fixed reference hedgerow density: 100m/ha according historical size in the region (Source: IGN/OFB national bocage monitoring system)
-	RS6.2 Existence of alternative stable states and thresholds between states	NA	NA
-	RS6.3 Frequency/timing of disturbance(s)	Drought and temperature may increase mortality of hedgerow species negatively the hedgerow dynamics. We add a parameter increasing linearly the hedgerow mortality. (Adams H D, Barron-Gafford G A, Minor R L, Gardea A A, Bentley L P, Law D J, Breshears D D, McDowell N G and Huxman T E 2017 Temperature response surfaces for mortality risk of tree species with future drought Environ. Res. Lett. 12 11…
-	RS6.4 Extent of disturbance(s)	Impacts homogeneously all hedgerows of the two sites
-	RS6.5 Magnitude/intensity of disturbance(s)	Three levels of climate change defined as increased magnitude in impact on hedgerow mortality. See refs in main text
RS7	Predictability of system dynamics	Predicted by projecting past dynamics using the Markov state transition model coupled with different management scenarios acting directly on the transitions between states of hedgerows
-	RS7.1 Stochastic/uncertainty of driving forces (disturbances, ecological dynamics)	Markov model of transition between states dynamics. The transition matrix is derived from field studies (for diversity indication) and GIS analysis (for transition probabilities). To be able to compare governance scenarios we assume that the two territories follow the same dynamics based on La Sauvetat data. (the differences between the eigen vectors of La Sauvetat transition matrix and Veyre-Mon…
-	RS7.2 Probability of driving forces leading to a given (intermediate) outcome	We studied the deterministic impact of climate change on the mortality of hedgerows (and thus the production of associated ecosystem services)
-	RS7.3 Variability (range) of driving forces	We studied separately the impact of 3 levels of climate change on hedgerows (and ecosystem services) = sensitivity analysis
-	RS7.4 Time period that may be predicted	Predictions are ceteris paribus based on historical data combined with governance/management scenarios. Based on these constraints, predictions are for a minimum of 5 years and a maximum of 30 years (i.e. based on the minimal and maximal time to use a particular governance system)
RS8	Storage characteristics
-	RS8.1 Type of resource storage: chemical storage as nutrients NPK, biological storage of species in habitats, demographic storage (e.g. bet-edging, Chesson storage effect)	storage in hedgerows of carbon, fruits, species, deadwood, pollinators
-	RS8.2 Minimal and maximal storage capacity (minimal viable storage capacity, maximal carrying capacity)	Minimal and maximal storage changes with state of hedgerow (small vs tall hedgerows)
-	RS8.3 Internal source-sink dynamics in storage	No source-sink dynamics considered
-	RS8.4 Spatial and temporal patterns in storage	spatial and temporal dynamics in storage measured during 4 years (1946, 1989, 2000, 2019) for four classes of hedgerow (short vs tall, species-rich vs species-poor)
RS9	Location	Hedgerows along property boundaries lanes and tracks
-	RS9.1 Connectivity of resource system to nearby ecological infrastructures of similar and different types	La Sauvetat (south) and Veyre-Monton (north) are adjacent areas but separated by a highway. The hedgerow network of both sites are connected to other networks. However the hedgerow network of Veyre-Monton is surounded by more urban areas, whereas the one from La Sauvetat is surrounded by farmlands and forests on the west side
RS10	Ecosystem history
-	RS10.2 Relevant geological history	NA	NA
-	RS10.3 Natural disaster history	NA	NA
-	RS10.4 Human use and disturbance history	Highway construction between 1946 & 1989	NA
Resource units (RU)
RU1	Resource unit mobility	Only associated with pollination: hedgerows possess bee hives and pollinate fields at long distances
-	RU1.1 Mobile resource units (Vogt et al., 2015)
	RU1.1.1 Outflows	Pollinators may be pollinating outside the area. But the reverse is true. Assumes equilibrium of out/inflows. Not analyzed for other services, but likely not very much as most resource users are from within La Sauvetat	Pollinators may be pollinating outside the area. But the reverse is true. Assumes equilibrium of out/inflows. Not analyzed for other services, but maybe more than for La Sauvetat, as the hedgerow network is visited by resource users coming from outside Veyre-Monton.
	RU1.1.2 Inflows
	RU1.1.3	Not applicable here for ecosystem services. State transitions are for the resource infrastructure (hedgerows) and not the resource units (see RS7.1)
-	RU1.2 Stationary resource units
RU2	Growth or replacement rate of resource units	See method section S2.2 of supplementary S2
RU3	Interactions among resource units
-	RU3.1 Competition within appropriated species (intraspecific competition) or competitive trade-offs between ecosystem services within the same ecological infrastructure
-	RU3.2 Competition between appropriated species (interspecific competition), competitive trade-offs between ecosystem services between different ecological infrastructures	We haven’t enough data to analyze trade-offs between ecosystem services. Would have required 3rd tier analysis of the link between ecosystem services and plant communities	not analyzed at this resolution
-	RU3.3 Predation (incl. Herbivory, parasitism) between appropriated species, destructive trade-off between ecosystem services	Not analyzed	Not analyzed
-	RU3.4 Mutualism, synergies between appropriated species in the production of ecosystem services	Not analyzed	Not analyzed
-	RU3.5 Multi-level functional interactions, spillover cascading effects between appropriated species, trophic levels, ecological functions, ecosystem services	See method section and Table S1	?????
RU4	Economic value
-	RU4.1 Subsistence value	Subsistence value ES: deadwood production (biomass)
-	RU4.2 Absolute economic value	Only economic cost of maintenance disservice has been evaluated. Most ecosystem services are intangible with no direct economic value.
-	RU4.3 Relative economic value	Not measured, many ecosystem services are intangible with no direct economic value. relative values of ecosystem services change with the sociology: rural vs peri-urban populations prio
RU5	Number of units	ritise different pool of ES
-	RU5.1 Absolute size	Absolute quantity of ES (total for a landscape) per ES type in 2019 in La Sauvetat
-	RU5.2 Relative size	Quantity of ES relative to the hedgerow type in 2019 in La Sauvetat	Quantity of ES relative to the hedgerow type in 2019 in Veyre-Monton
RU6	Distinctive characteristics	Spatial & temporal distribution of ES depend on spatial and temporal distribution of hedgerows + on Stasis of some ES within the hedgerow (deadwood, fruits), mobility of some ES outside the hedgerow in adjacent fields and tracks (shade, pollination, recreational & aesthetics), some ES extend outside the geographic boundary (aesthetics)
-	RU6.1 Natural distinctive markings	Hedgerows and ecosystem services are semi-natural ecological infrastructures and resources: built and maintained by human activities. Without humans hedgerows would disappear
-	RU6.2 Artificial distinctive markings	Hedgerows and ecosystem services are semi-natural ecological infrastructures and resources: built and maintained by human activities. Without humans hedgerows would disappear
RU7	Spatial & temporal distribution	Depends on the space and time distribution of hedgerows and adjacent (agro)ecological infrastructures that surround them. Modeled using GIS data of hedgerow networks and correlational models relating the quantity of every ecosystem service to one of the four types of hedgerows. See supplementary information.
-	RU7.1 Spatial patchiness (heterogeneity of resource or of spatial distribution of units of ecological infrastructures)	Comparison between rural and periurban spatial distribution of hedgerow units measured using GIS (measures of aggregation, compaction????)
-	RU7.2 Temporal patchiness (heterogeneity of resource or temporal progression of units of ecological infrastructures: phenology)	Comparison between rural and periurban Markovian state transition model of temporal progression and retrogression between stages of hedgerows
Actors
A1	Number of relevant actors
-	A1.1: number of actors involved in resource Exploitation activities (production, appropriation, transformation, use of resource units)	Recreational users = mostly local inhabitants, consumptive users (small), number of farmers (average farm size in ha), estimation of the average quantity of hedgerows per farmer	Recreational users = larger, consumptive users (small), number of farmers (average farm size in ha), estimation of the average quantity of hedgerows per farmer
-	A1.2: number of actors involved in resource Conservation activities (provision, support, regulation, maintenance, adaptation of the resource infrastructure and access to resource units)	see Krief’s report for the number of farmers and inhabitants regrouped for managing hedgerows (scenario CCA3), proportion of farmers with EU-AES /payment for ecosystem services (scenario CCA2), and proportion of farmers under Terre-de-lien leasing (scenario CCA4)	see Krief’s report for the number of farmers and inhabitants regrouped for managing hedgerows (scenario CCA3), proportion of farmers with EU-AES /payment for ecosystem services (scenario CCA2), and proportion of farmers under Terre-de-lien leasing (scenario CCA4)
-	A1.3: number of actors involved in Policy-Making of the DAPP process	Currently none, but interview suggests that most actors are interested
A2	Socio-economic attributes
-	A2.1: socio-economic attributes of the actors involved in resource Exploitation activities (production, appropriation, transformation, use of resource units)
-	A2.2: socio-economic attributes of the actors involved in resource Conservation activities (provision, support, regulation, maintenance, adaptation of the resource infrastructure and access to resource units)
-	A2.3: socio-economic attributes of the actors involved in Policy-Making activities (rule-making,
A3	History of past experience	Most actors interviewed did not understand the concept of ecosystem services and the benefits provided by hedgerows, making the interview difficult. Needed to prepare visual pictures of different types of hedgerows and different types of ecosystem services to talk about their experience and involvement.
-	A3.1: History of past experience of the actors involved in Exploitation activities (production, appropriation, transformation, use of resource units)
-	A3.2: History of past experience of the actors involved in the Conservation activities (provision, support, regulation, maintenance, adaptation of the resource infrastructure and access to resource units)	(i) informal grouping of neighboring farmers and local inhabitants: only one event for managing collectively the spatial location of replanting hedgerows for limiting environmental hazards (landslide, fire ….) with no funding help, but cooperation is reducing individual costs. (ii) NGO “Mission haie” are professionals with long experience and good fundings. Since 1996, provides mostly free advice…
-	A3.3: History of past experience of the actors involved in Policy-Making activities, including governing the DAPP process	Mostly elected representatives of territorial communities have decision power regarding hedgerows and ecosystem services. But other actors have also policy-making power. Terre-de-lien NGO has experience setting environmental guidelines for his farmers, but we don’t know how their approach matches the requirements of the DAPP framework. The “Chambre d’agriculture” (regional public agro-ecological …	No experience
A4	Location
-	A4.1: Location of the actors involved in the Exploitation activities (production, appropriation, transformation, use of resource units)	In La Sauvetat, the production of ecosystem services depend mostly on local farmers who own the hedgerows and live in the area. Resource Use: all users of ecosystem services are mostly for the local area	In Veyre-Monton, the production of ecosystem services depend mostly on local farmers who own the hedgerows and live in the area. Resource Use: potentially some users of ecosystem services can be from outside the area, given the urban expansion of the surrounding area
-	A4.2: Location of the actors involved in the Conservation activities (provision, support, regulation, maintenance, adaptation of the resource infrastructure and access to resource units)	(i) informal grouping of neighboring farmers are mostly local inhabitants, (ii) NGO “Mission haie” are from outside the two studied areas. (iii) Gardening task force of the city council. (iv) “Terre-de-Lien” association of farmers are from inside and outside of the area.
-	A4.3: Location of the actors involved in the Policy-Making of the DAPP process	(i) “Terres-de-Lien” NGO boarding committee are from outside the two areas, (ii) city council/mayor are from inside the two areas, (iii) Public Regional agro-ecological agency (in charge of the link between farmers, the state and the EU) are from outside the two areas
A5	Leadership / entrepreneurship
-	A5.1: Leadership / entrepreneurship attributes of the actors involved in the Exploitation activities (production, appropriation, transformation, use of resource units)	????? To be defined	????? To be defined
-	A5.2: Leadership / entrepreneurship attributes of the actors involved in the Conservation activities (provision, support, regulation, maintenance, adaptation of the resource infrastructure and access to resource units)	????? To be defined	????? To be defined
-	A5.3: Leadership / entrepreneurship attributes of the actors involved in the Policy-Making activities of the DAPP process	????? To be defined	????? To be defined
A6	Norms /(trust-reciprocity) / social capital
-	A6.1: Social capital of the actors involved in the Exploitation activities (production, appropriation, transformation, use of resource units)	Current norm matches successive land consolidation laws and private property regime: farmers are responsible of the ecological management of their own hedgerows, in relation with their personal preference for ecosystem services. Letting other resource users benefit from hedgerows is a matter of personal tolerance of farmers. Most farmers accept that other people harvest small fruits and deadwood.…
-	A6.2: Social capital associated with the Conservation activities (provision, support, regulation, maintenance, adaptation of the resource infrastructure and access to resource units)	See Figure S1 and associated text
-	A6.3: Social capital associated with the Policy-Making activities, including with the governance of the DAPP process
A7	Knowledge of SES / mental models / beliefs
-	A7.1: Knowledge & beliefs associated with Exploitation (production, appropriation, transformation, use of resource units)	In la Sauvetat village, most inhabitants have longer roots to the village and norms are more shared between users and related with consumptive benefits	In Veyre-Monton, new inhabitants from the metropolitan area of Clermont-Ferrand are changing the norms by adding new recreational and conservation interests (especially related with new landscape aesthetics, shade for promenade, wood biomass as a synonym of carbon sequestration to combat climate change, etc ...)
-	A7.1: Knowledge & beliefs associated with Conservation (provision, support, regulation, maintenance, adaptation of the resource infrastructure and access to resource units)	Farmers have their Knowledge and beliefs involved: from their parents, neighbors (all the scenarios), from hedgerow conservation NGOs (mostly scenario CCA3 and CCA4), Terre-de-Lien association (scenario CCA4)
-	A7.1: Knowledge & beliefs associated with Policy-Making and the governance of the DAPP process	The mayor's team has knowledge that is quite similar to that of the surrounding farmers. However, they lack any understanding of DAPP planning.	The mayor has limited knowledge and primarily relies on information provided by territorial agents and letters from citizens. Nevertheless, there is a notable absence of comprehension regarding DAPP planning.
A8	Proportion of resource dependent actors	Not analyzed	Not analyzed
-	A8.1: Proportion of resource dependent actors involved in Exploitation (production, appropriation, transformation, use of resource units)	Not analyzed	Not analyzed
-	A8.2: Proportion of resource dependent actors involved in Conservation (provision, support, regulation, maintenance, adaptation of the resource infrastructure and access to resource units)	Not analyzed	Not analyzed
-	A8.3: Proportion of resource dependent actors involved in Policy-Making, including the governance of the DAPP process	Not analyzed	Not analyzed
A9	Technologies available
-	A9.1: Existing technologies available for Exploitation (production, appropriation, transformation, use of resource units)	See Table S1	????? Existing technologies used by farmers for managing hedgerows)
-	A9.2: Existing technologies available for Conservation (provision, support, regulation, maintenance, adaptation of the resource infrastructure and access to resource units)	Mostly visual monitoring techniques. mostly provided by the NGO Mission haie with good scientific knowledge on the topic . Territorial public agents are monitoring the sate of some hedgerows along roads with poor scientific knowledge on the topic.
-	A9.3: Existing technologies available for Policy-Making including the governance of the DAPP process	????? Existing technologies used to involve/inform local inhabitants and incentivise the creation of supporting groups to support hedgerows: monthly letters to inhabitants, meetings (Mayor team, between Terre-de-Lien board members), twitter/Facebook, denunciation letters when farmers are destroying hedgerows, ….)
Governance Systems (GS)
GS1	Policy area (McGinnis & Ostrom, 2014)	Multi-functional policy area from mixing local to national actors frequently mentioned by actors from the two area: Need for adaptation policy (disconnection between national objectives and local implementation, lack of of appropriation and perception of benefits from adaptation and environmental uncertainties), Environmental policy (role of hedgerows for biodiversity conservation, ecological cor…
GS2	Geographic scale of governance system	Mostly matches, except for some decisions regarding land buying depending on national laws + territorial community which is a grouping of villages for the sharing of common infrastructures and water catchment decisions. The latter involves hedgerows in the decision process.	does not match: same constraints as La Sauvetat + some farmers who own the hedgerow live outside the area, some ES beneficiaries live also outside the area.
-	GS2.1 Associated with Exploitation	Centered on landowner (farmer) So scale of resource appropriation rules ≈ scale of resource production rules for common-pool ecosystem services (harvesting of (dead)wood biomass, of small fruits, tree shade). No resource transformation and use rules. Rules for pollination and landscape aesthetics do not respect geographic boundaries.
-	GS2.2 Associated with Conservation	Cross geographic boundaries for the two sites: cooperation between Terre-de-Lien farmers goes beyond the area of interest (scenario D), opportunistic/spontaneous neighboring farming group mostly respects geographic boundaries (scenario C)
-	GS2.3 Associated with Policy-Making, including the DAPP process	Maintenance of hedgerows for security reasons along roads and in conservation areas are governed by the city council (local) and departmental authorities operating outside the local jurisdiction. Plan de Gestion Bocage (“hedgerow network planing council”) has also governing authorities on the management of hedgerows. It is composed of the ccommunity of towns, private interest groups (e.g. SCIC EN…
GS3	Proportion of participating population (McGinnis & Ostrom, 2014)	No analyzed	No analyzed
-	GS3.1 Proportion of population participating in Exploitation activities (as Exploitation actors)	No analyzed	No analyzed
-	GS3.2 Proportion of population participating in Conservation activities (as Conservation actors)	No analyzed	No analyzed
-	GS3.3 Proportion of population participating in Policy-Making activities (as Policy-Making actors)	No analyzed	No analyzed
-	GS3.4 Proportion of Exploitation actors participating in Policy-Making activities	No analyzed	No analyzed
-	GS3.5 Proportion of Policy-Making actors participating in Exploitation activities (some are outsiders)	No analyzed	No analyzed
-	GS3.6 Proportion of Exploitation actors participating in Conservation activities	No analyzed	No analyzed
-	GS3.7 Proportion of Conservation actors participating in Exploitation activities	No analyzed	No analyzed
-	GS3.8 Proportion of Policy-Making actors participating in Conservation activities	No analyzed	No analyzed
-	GS3.9 Proportion of Conservation actors participating in Policy-Making activities	No analyzed	No analyzed
GS4	Regime type (demo/auto-cratic, mono/poly-centric) (McGinnis & Ostrom, 2014)
GS5	Rule-making organizations (McGinnis & Ostrom, 2014)
-	GS5.1 Public sector organizations (government agencies, etc …)	city council (for ??which activity???), territorial community (for …), state government agency and the EU agri-environmental scheme (voluntary engagement into payments for ecosystem services).
-	GS5.2 Private sector organizations (for-profit)	Not analyzed	Not analyzed
-	GS5.3 Nongovernmental, nonprofit organisations and clubs	Hedgerow conservation NGO named “Mission haie Auvergne”. Since 1996, provides mostly free advice and training sessions to farmers and city council on the different ways to manage hedgerows for one wor several ecosystem services (including private, public and common-goods and services). NGO “Mission haies” receives funding from multiple public agencies (https://missionhaies.wixsite.com/mission-hai…
-	GS5.4 Community organizations	Private NGO “Terre-de-Lien” who is buying farmlands (private ownership) and leasing them to farmers under strict organic/biodynamic farming constraints.
-	GS5.5 Hybrid organisations
GS6	Rules-in-Use (McGinnis & Ostrom, 2014)	Within DAPP system: symmetric aggregation (1 person = 1 vote) => one resource user preferring a consumptive ES will have no more weigh than another preferring cultural ES
-	GS6.1 Rules associated with Exploitation (within Exploitation and with other actors and infrastructures)	SEE METHOD SECTION 2.3
	GS6.1.1 Operational-choice rules (McGinnis & Ostrom, 2014) [ex-GS5] (Production, Distribution, Appropriation, Assignment, Consumption)
	GS6.1.2 Collective-choice rules (McGinnis & Ostrom, 2014) [ex-GS6] (self-governance capabilities and limits for prescribing, invoking, monitoring, applying, enforcing)
	GS6.1.3 Constitutional-choice rules (McGinnis & Ostrom, 2014) [ex-GS7] (self-organization capabilities and limits for prescribing, invoking, monitoring, applying, enforcing)
-	GS6.2 Rules associated with Conservation (within Conservation and with other actors and infrastructures)
	GS6.1.1 Operational-choice rules (McGinnis & Ostrom, 2014) [ex-GS5] (Production, Distribution, Appropriation, Assignment, Consumption)
	GS6.1.2 Collective-choice rules (McGinnis & Ostrom, 2014) [ex-GS6] (self-governance capabilities and limits for prescribing, invoking, monitoring, applying, enforcing)
	GS6.1.3 Constitutional-choice rules (McGinnis & Ostrom, 2014) [ex-GS7] (self-organization capabilities and limits for prescribing, invoking, monitoring, applying, enforcing)
-	GS6.3 Rules associated with Policy-Making (within Policy-Making and with other actors and infrastructures)
	GS6.1.1 Operational-choice rules (McGinnis & Ostrom, 2014) [ex-GS5] (Production, Distribution, Appropriation, Assignment, Consumption)
	GS6.1.2 Collective-choice rules (McGinnis & Ostrom, 2014) [ex-GS6] (self-governance capabilities and limits for prescribing, invoking, monitoring, applying, enforcing)
	GS6.1.3 Constitutional-choice rules (McGinnis & Ostrom, 2014) [ex-GS7] (self-organization capabilities and limits for prescribing, invoking, monitoring, applying, enforcing)
GS7	Property rights systems (relations among people in relation to resource units and infrastructures) (McGinnis & Ostrom, 2014)
-	GS7.1 Resource infrastructure: classification by ownership type (here hedgerows within the entire hedgerow network)
	GS7.1.1 Some or all units of RSI are communally/community-owned	not considered here	not considered here
	GS7.1.2 Some units or all units of RSI are publicly-owned	not considered here	not considered here
	GS7.1.3 Some or all units of RSI are privately-owned by different owners	Most hedgerows are individually privately owned. Some were owned by the commune. None were owned by the state government or a club of co-owners. Currently most conventional farmers manage individually their hedgerows (scenario CCA1). Some manage the hedgerows collectively opportunistically when confronted with specific environmental hazards, like land-slide (scenario CCA3). Others are happy to ac…
-	GS7.2 Resource units: classification of ownership according to the resource excludability and rivalness (e.g. see classification of ecosystem services types by Costanza, 2008)
	GS7.2.1 All or some resource units are common-pool ecosystem goods and services (e.g. mostly provisioning ecosystem services)	See Tables 2 and 3 in the main text
	GS7.2.2 Some ecological resource units are public-goods and services with no appropriation problems (e.g. most supporting and regulating services and some cultural services)	(4) Landscape aesthetics: measured as diversity of hedgerow types in the landscape (+ equation), (5) Environmental hazards (fire, injuries by fallen trees & branches, land-slide): measured as … (+ equation)
	GS7.2.3 Some ecological resource units are private-goods and services (e.g. most provisioning ecosystem services)	(6) Cost of maintenance: measured as … (7) Provision of wood biomass: measured as … (+ equation),
	GS7.2.4 Some ecological resource units are toll/club-goods and services (e.g. most cultural ecosystem services)	No club goods / services mentioned by the actors
GS8	Repertoire of cultural knowledge, beliefs (norms) and practices (strategies) KBP with no rules and sanctions (Basurto et al., 2013)
-	GS8.1 Diversity of KBP associated with Exploitation
-	GS8.2 Diversity of KBP associated with Conservation
-	GS8.3 Diversity of KBP associated with Policy-Making
GS9	Network structure [ex-GS3] ( connections among the rule-making organizations and the population subject to these rules)
-	GS9.1 Centrality	scenario CCA1 (currently the most dominant practice): very decentralized decision process to every hedgerow owner (farmer). Scenario CCA2: payment for ecosystem service implies a recentralized structure of the decision process at a state government/European union level (Policy-Making+2b > Exploitation). Scenario CCA3: mixture of purely decentralized structure for certain types of decisions regard…
-	GS9.2 Modularity	not analyzed	not analyzed
-	GS9.3 Connectivity	not analyzed
-	GS9.4 Number of levels	not analyzed	not analyzed
GS10	Historical continuity of the governance system (recent vs long-lasting, open vs close to internal adaptation)	both areas (rural, peri-urban) have long-lasting democratic governance systems constitutionally open to adaptation in collective-choice and operational-choice, and possessing a certain diversity of confronting visions. Both have rule-in-use that are very conservative in their approach, slow to change, but peri-urban actors have settled more recently, came from the metropolis and bring new visions…
-	GS10.1 Associated with Exploitation	scenario CCA1 (currently the most dominant practice) is a long-lasting system reinforced by successive land consolidation laws based on productivity criteria, especially after world war 2. recent land consolidation laws based on ecological criteria (2004) provide incentives to cooperate with either the European union, neighbors or other NGOs to improve the ecological state of hedgerows.
-	GS10.2 Associated with Conservation	Not analyzed	Not analyzed
-	GS10.3 Associated with Policy-Making	Not analyzed (only the fact that election-based system of mayor since 1789, + successive land consolidation laws imposed on farmers)
Interactions (I)
I1	Harvesting / using resource units by divers users	Farmers: harvesting deadwood, living biomass, fruits and using spatial tree shade units. local population (Sauvetat & Veyre-Monton): harvesting fruits and using spatial tree shade units. Outsiders from mostly the surrounding urban units (Veyre-Monton surroundings ~ 10,000 inhabitants): harvesting fruits harvesting fruits and using spatial tree shade units
I2	Information sharing among actors	Depends on the constitutional-choice arrangements (see scenarios CCA-1 vs 2, vs 3, vs 4). Scenario CCA1 (currently the most dominant practice): no information sharing. Scenario CCA2: information sharing with state government and European union. Scenario CCA3: informal and a-posteriori information sharing between resource users after new problem emerges (between neighboring/local farmers, local po…
I3	Deliberation process
	I3.1 Regarding the DAPP plan and choices of adaptation pathways	Depends on the constitutional-choice arrangements (see scenarios CCA-1 vs 2, vs 3, vs 4). Scenario CCA1 (currently the most dominant practice): deliberation process for every farmer in relation with his/her hedgerow property. Scenario CCA2: formal deliberation process shared between individual farmers and the state government/European union that provide payment for ecosystem services (agro-enviro…
I4	Conflicts among actors (details in following sheet)
-	I4.1 Among Exploitation winning and losing actors (appropriators, producers, transformers, users) as a result of a given adaptation pathway	Scenario CCA3: report of conflicts between farmers regarding the best positioning of hedgerows in the landscape.	Reports of conflicts between ????
-	I4.2 Among Conservation actors regarding best supporting choices as a result of a given adaptation pathway	Hedgerow conservation NGO members are very prudent and avoid conflicts when talking to farmers, by only providing farmers information on the range of options without suggesting them what is best. We did not analyse existing conflicts between Terre-de-Lien association of farmers.
-	I4.3 Among Policy-Making actors regarding best DAPP planning	not analyzed	not analyzed
-	I4.4 Between Exploitation and Policy-Making actors	not analyzed	not analyzed
	I4.4.1 Regarding the excess or lack of openness of DAPP planning, or clear/inadequate DAPP rules	not analyzed	not analyzed
	I4.4.2 Regarding the lack of involvement in the DAPP planning process or respect of the DAPP plan regarding the respect of rules	not analyzed	not analyzed
-	I4.5 Between Exploitation and Conservation actors	not analyzed	not analyzed
	I4.5.1 Regarding the excess or lack of (clear/adequate) Conservation rules or compensations for respecting Conservation rules	not analyzed	not analyzed
	I4.5.2 Regarding the excess or lack of respect of Conservation rules, involvement in Conservation activities	not analyzed	not analyzed
-	I4.6 Between Conservation and Policy-Making actors	not analyzed	not analyzed
	I4.6.1 Regarding the excess or lack of openness of DAPP planning, clear/inadequate DAPP rules or funding for conservation activities	not analyzed	not analyzed
	I4.6.2 Regarding the non respect of the DAPP plan regarding Conservation activities	not analyzed	not analyzed
I5	Investment activities	not analyzed	Not analyzed
I6	Lobbying activities	not analyzed	Not analyzed
I7	Self-organizing activities	Currently few examples in the two sites of self-organized groups of farmers and neighbors who opportunistically manage collectively hedgerows when environmental hazards become a risk, e.g. fire and land-slide (equivalent to scenario CCA3)
I8	Networking activities	Not analyzed	Not analyzed
I9	Monitoring activities	Mayor of ????? told us that he is regularly receiving letters from local inhabitants denouncing farmers destroying hedgerows on their properties (2a). Hedgerow conservation NGO is monitoring on demand the ecological state of hedgerows of a farmer (6a).	?????
I10	Evaluative activities	Currently no evaluation strategy implemented in these two areas. At every decision node presented in the DAPP maps. Here we choose a frequency of five years.
Outcomes (O)
O1	Social performance measures (e.g. efficiency, equity, accountability, sustainability)
-	01.1 Associated with Exploitation
	01.1.1 state performance measures	respect the minimal (maximal) threshold of provisioning of seven ecosystem (dis)services (see table S2): one public service (landscape aesthetics), two private (dis)services (cost of maintenance, biomass harvesting), four common (dis)services (fruit harvesting, pollination, tree shade, environmental hazards)
	01.1.2 rate performance measures	not analyzed	not analyzed
-	01.2 Associated with Conservation	not analyzed	not analyzed
	01.2.1 state performance measures	not analyzed	not analyzed
	01.2.2 rate performance measures	not analyzed	not analyzed
-	01.3 Associated with Policy-Making	not analyzed	not analyzed
	01.3.1 state performance measures	not analyzed	not analyzed
	01.3.2 rate performance measures	not analyzed	not analyzed
O2	Ecological performance measures (e.g. overharvested, resilience, robustness, biodiversity)
-	O2.1. state performance measures	Respect of minimal levels of ecosystem services (see table S2). Hedgerow species diversity levels [species richness], height of hedgerows [meters], diversity of the four types of hedgerow [Shannon index], total length [meters] of the hedgerow network
-	O2.2 rate performance measures	growth rate of the hedgerow network and of ecosystem services. See method section
O3	Externalities to other SES
-	02.2 Associated with Exploitation (ecosystem services and mimicking of practices outside the area)	pollination, aesthetics and water flow and quality outside the area	pollination, aesthetics and water flow and quality outside the area
-	03.3 Associated with Conservation (influence outside the area)	not analyzed	not analyzed
-	03.4 Associated with Policy-Making (influence and jurisprudence outside the area)	not analyzed	not analyzed

## Sheet: Details conflicts (SES attribut
Description	Objet of tension	Actors Present	Semi-Natural Infrastructure of concern	Main Ecosystem (dis)services
wind turbine installation	Land management	Elected officials, Residents, prospecting companies	Prairies	Aesthetics, agricultural production
Use of territorial view cones / view corridor	Land management	Elected officials, residents, landscape design offices	Forests, tall hedgerows	Aesthetics, carbon storage, wood production
Political influence of small municipalities in governance bodies related to land use planning (PLUi)	Land management	Elected officials	/	/
Ground-mounted photovoltaic installation vs environmental and food-related issues	Land management	Elected officials, Prospecting companies, Residents, Architects of Historic Monuments (France)	Hedgerows, Grass strip margins	Agricultural production, biodiversity conservation, aesthetics
Standards for building densification vs issues with water runoff	Land management	Elected officials, Residents, Departmental Directorate for Territorial management	Hedgerows, Grass strip margins	Water filtering
Planting woody vegetation on agricultural areas sensitive to runoff	Land management	Farmers, Elected officials	Hedgerows, Grass strip margins	Maintien du sol
Conflicts between neighboring farmers over the dispersal of pesticides	Negative externalities	Farmers	Hedgerows, grass strip margins	Agricultural production, air and water filtration
Rural road development: balancing the passage of agricultural machinery and recreational activitie	Leisure activities	Farmers, Elected officials, Residents	Hedgerows	Aesthetics, Biodiversity conservation
Balancing between agricultural and recreational activities	Leisure activities, negative externalities	Farmers, Elected officials, Residents	Hedgerows	Aesthetics, agricultural production, anti-drift of phytosanitary products
Trade-offs unfavorable to agricultural activity: lack of land available for constructing agricultural buildings	Land management	Farmers, Elected officials	/	Food production
