# Supplementary material for: Integrating adaptation pathways and Ostrom’s framework for sustainable governance of social-ecological systems in a changing world
Source: PeerJ journal article supplement (doi:10.7717/peerj.18938), 2025-02-24
Supplement: FileS3.zip [file Supplementary.S3.Hedgerows.Geo.Phys.Ecol.data.Peri.Urban.and.Rural.1989.2000.2019.xlsx]

## Sheet: Peri.Urban.1989_2000
id	Type_haie	Longueur	join_id	join_Type_	join_Longu	distance
1	ponctuee	133.506	1	ponctuee	129.752	3.093764139077129
2	ponctuee	115.516	2	ponctuee	108.34	0
3	ponctuee	245.579	3	ponctuee	285.4	0
4	ponctuee	473.57	5	ponctuee	312.843	0
5	ponctuee	172.486	269	ponctuee	182.013	0
6	basse	63.888	268	ponctuee	62.614	0
7	basse	90.431	0	vide	90.431	26.48500363479565
8	basse	41.845	0	vide	41.845	82.57795790269074
9	ponctuee	111.041	270	ponctuee	103.429	1.975407153050308
10	alignement	150.85	12	alignement	151.139	0
11	alignement	50.801	14	alignement	50.13	0.309647243061626
12	alignement	85.087	18	alignement	42.243	0
13	haute	123.68	0	vide	123.68	59.51812667188058
14	ponctuee	203.973	271	ponctuee	200.09	0
15	alignement	144.456	0	vide	144.456	59.661497086076466
16	basse	42.586	0	vide	42.586	139.04228034764526
17	basse	308.363	55	basse	115.165	0
18	basse	91.026	21	haute	89.593	0.251013082271932
19	ponctuee	100.439	0	vide	100.439	41.84872262544205
20	ponctuee	146.18	56	haute	83.629	0
21	ponctuee	109.934	57	haute	103.518	0
22	alignement	45.763	50	alignement	44.547	1.62025492352722
23	alignement	77.56	22	alignement	79.225	0
24	ponctuee	112.974	23	ponctuee	106.381	0
25	alignement	68.819	25	alignement	75.646	0
26	ponctuee	30.031	0	vide	30.031	1.69512013522204
27	basse	41.806	58	basse	70.074	0.924831563418793
28	alignement	67.603	29	alignement	85.465	0.521348454880834
29	ponctuee	24.752	63	ponctuee	55.508	0.031245168780089
30	ponctuee	48.472	59	ponctuee	43.474	0
31	ponctuee	88.742	64	ponctuee	90.607	0
32	haute	33.191	272	haute	32.129	1.050328047412
33	alignement	42.04	30	alignement	63.985	0
34	basse	57.611	31	basse	51.481	0.289930417370949
35	basse	84.457	32	basse	95.973	0.454346183888894
36	ponctuee	68.178	33	haute	69.831	0
37	basse	36.704	34	basse	36.006	0.699632718732215
38	alignement	35.954	49	alignement	35.746	2.467293016247845
39	ponctuee	95.749	26	ponctuee	93.663	0
40	ponctuee	93.278	0	vide	93.278	10.360520403023108
41	haute	37.193	273	haute	27.093	0
42	haute	107.484	68	haute	94.733	0
43	ponctuee	126.463	66	ponctuee	138.067	0
44	ponctuee	44.383	65	haute	42.043	0.09754969510203
45	ponctuee	41.33	67	ponctuee	43.221	1.150860535264655
46	alignement	44.04	48	alignement	43.555	1.36188012385068
47	basse	39.651	47	basse	38.608	0
48	alignement	112.357	0	vide	112.357	27.11282582601801
49	ponctuee	155.821	35	ponctuee	156.107	1.035890907832668
50	haute	99.691	274	haute	99.551	0.122567197391192
51	basse	100.432	69	basse	103.763	0
52	alignement	107.846	0	vide	107.846	25.989857050879994
53	basse	33.754	10	ponctuee	134.032	0
54	basse	58.312	267	haute	56.136	0.408682777807444
55	basse	69.839	0	vide	69.839	98.39114322511921
56	alignement	21.404	54	alignement	24.845	0
57	basse	40.136	17	haute	38.345	0
58	haute	155.319	0	vide	155.319	129.83112104017687
59	ponctuee	112.126	87	ponctuee	113.787	0
60	basse	81.563	89	basse	49.276	0
61	basse	58.498	0	vide	58.498	3.286934736386109
62	basse	178.417	82	basse	148.558	0
63	basse	62.927	80	basse	110.213	1.840700278144282
64	basse	63.304	276	basse	59.01	0
65	basse	48.461	275	ponctuee	44.797	0
66	ponctuee	89.751	0	vide	89.751	68.23538626028396
67	ponctuee	85.319	0	vide	85.319	68.96046472306644
68	ponctuee	77.3	0	vide	77.3	93.74999644745141
69	ponctuee	93.052	0	vide	93.052	39.628217445990806
70	ponctuee	64.267	277	ponctuee	71.157	0
71	basse	25.038	0	vide	25.038	17.016853864346892
72	alignement	40.567	75	alignement	40.841	4.882070525743322
73	ponctuee	178.085	70	ponctuee	115.506	0
74	ponctuee	61.283	0	vide	61.283	4.873701725014701
75	ponctuee	45.976	0	vide	45.976	29.191219184084485
76	basse	24.894	0	vide	24.894	10.009506051679322
77	haute	36.061	0	vide	36.061	46.46346540785172
78	ponctuee	76.28	0	vide	76.28	69.71050185321089
79	basse	97.322	37	basse	98.41	0.643531722853462
80	basse	130.559	38	ponctuee	87.783	4.564424493309898
81	ponctuee	145.715	301	ponctuee	111.717	1.381938835916332
82	ponctuee	75.956	263	ponctuee	91.081	1.811633916808816
83	haute	217.027	42	haute	206.86	0
84	basse	213.565	41	basse	71.008	2.394668130044635
85	alignement	39.561	45	alignement	37.938	0
86	haute	68.411	44	haute	73.167	0.145337012003861
87	basse	32.782	46	ponctuee	80.724	1.186589793056889
88	ponctuee	72.276	278	ponctuee	79.177	0
89	basse	75.083	86	basse	47.104	3.066891478813916
90	ponctuee	76.351	83	ponctuee	38.826	1.345490081634734
91	basse	102.653	84	basse	43.187	0
92	ponctuee	46.669	279	ponctuee	48.517	0
93	alignement	66.383	90	alignement	72.008	0
94	basse	81.866	91	ponctuee	77.355	0
95	ponctuee	89.246	85	haute	60.961	2.019536070407657
96	ponctuee	99.29	94	ponctuee	78.676	0
97	ponctuee	74.894	93	ponctuee	64.223	0
98	basse	25.913	280	basse	29.877	0
99	ponctuee	101.731	0	vide	101.731	4.007683158520352
100	basse	27.616	92	ponctuee	38.673	2.253922899167695
101	haute	85.114	74	haute	92.78	0
102	haute	66.167	73	ponctuee	68.274	1.675037249594607
103	alignement	48.01	224	alignement	63.678	0
104	basse	21.423	223	basse	31.142	5.042116071954313
105	basse	126.458	0	vide	126.458	101.5034984433601
106	alignement	64.105	212	alignement	79.186	0.306044640525733
107	ponctuee	160.36	0	vide	160.36	4.280893730537668
108	basse	144.345	97	basse	135.859	0
109	haute	19.85	95	haute	18.505	1.243853556869024
110	haute	64.8	100	haute	48.097	2.541332987750799
111	haute	128.024	130	haute	95.919	0
112	ponctuee	123.015	0	vide	123.015	47.26540253002541
113	haute	65.412	0	vide	65.412	75.49149451621304
114	haute	66.319	129	haute	67.531	0
115	haute	98.148	128	haute	99.782	0.169555302206059
116	haute	80.42	127	haute	86.355	3.271781909046181
117	haute	84.194	103	haute	89.295	0.568561717948008
118	basse	69.154	104	basse	76.109	1.249012961430503
119	haute	102.308	126	haute	110.513	0.543053230397167
120	basse	75.205	105	basse	66.94	0.258515371503866
121	basse	432.495	106	basse	465.131	0
122	ponctuee	351.38	107	ponctuee	356.755	0
123	ponctuee	34.363	108	ponctuee	32.216	0
124	basse	34.38	109	basse	35.378	1.083068427414455
125	basse	202.273	111	basse	193.224	0
126	ponctuee	120.635	112	basse	121.436	2.889086097772246
127	ponctuee	157.483	114	ponctuee	157.785	2.555350946091887
128	ponctuee	834.961	116	ponctuee	846.933	0
129	ponctuee	100.581	123	ponctuee	165.173	0.063525655899125
130	basse	142.321	122	basse	141.882	1.323365377304619
131	alignement	14.658	120	alignement	20.245	0
132	alignement	94.693	121	alignement	99.648	0.012380526578553
133	alignement	34.769	125	alignement	34.828	0
134	basse	25.681	124	basse	37.359	2.319480274981911
135	alignement	176.639	119	alignement	273.897	0
136	alignement	47.466	110	alignement	51.557	1.217874811843032
137	ponctuee	186.134	133	basse	192.596	0.253212210424525
138	ponctuee	28.051	132	basse	33.295	3.901982570736461
139	basse	67.893	131	ponctuee	81.101	0.521301179220128
140	haute	386.353	213	haute	375.601	0
141	haute	45.89	215	haute	50.477	0
142	haute	214.673	205	haute	143.803	0
143	ponctuee	121.153	204	ponctuee	119.924	0
144	haute	75.603	0	vide	75.603	8.739909768858407
145	ponctuee	162.552	206	ponctuee	163.614	0.606929363553316
146	haute	155.371	220	haute	138.791	0
147	haute	116.799	194	haute	119.736	0
148	haute	684.845	208	haute	499.507	0
149	haute	92.415	209	haute	95.181	0
150	ponctuee	193.178	207	ponctuee	188.326	0.182778039776445
151	ponctuee	49.746	196	ponctuee	47.103	0.409512626043453
152	ponctuee	99.092	195	haute	112.463	0.371062857785655
153	alignement	40.457	192	alignement	32.512	2.608825975028401
154	alignement	34.823	193	alignement	47.678	0
155	ponctuee	58.443	281	ponctuee	68.794	0.193058330866582
156	ponctuee	71.567	190	ponctuee	128.237	0
157	basse	70.889	188	basse	96.94	0.111251640031927
158	ponctuee	78.505	185	ponctuee	64.59	0
159	ponctuee	147.009	187	ponctuee	144.347	0
160	basse	83.204	155	basse	103.124	0
161	ponctuee	70.02	154	ponctuee	97.17	0
162	ponctuee	189.7	139	ponctuee	191.264	0
163	ponctuee	277.987	138	ponctuee	274.806	0
164	basse	30.685	151	basse	25.426	0.442617333938571
165	basse	92.01	0	vide	92.01	35.70004536588697
166	basse	119.243	149	basse	118.153	0.020601767727312
167	haute	63.062	136	haute	55.759	0
168	basse	47.232	134	basse	46.336	0
169	haute	61.032	170	haute	66.111	0.780702097650615
170	ponctuee	156.375	101	basse	131.592	0.458906089033161
171	haute	83.388	0	vide	83.388	9.064779808193572
172	haute	116.831	283	haute	122.526	0
173	alignement	90.884	201	alignement	84.543	1.130137981521211
174	basse	78.665	203	basse	42.157	1.00713297391216
175	basse	109.694	0	vide	109.694	66.53387981774603
176	ponctuee	86.634	140	ponctuee	98.918	0.944457645509357
177	ponctuee	148.588	142	basse	148.93	0
178	ponctuee	67.652	141	ponctuee	75.897	0
179	ponctuee	170.78	145	ponctuee	181.808	0
180	basse	39.891	153	basse	159.847	1.581998203524316
181	alignement	50.658	146	alignement	49.608	0.559215636661356
182	ponctuee	163.411	147	ponctuee	142.138	0
183	alignement	26.976	0	vide	26.976	26.892535207790548
184	ponctuee	56.758	177	basse	50.446	1.19981499849712
185	ponctuee	117.299	0	vide	117.299	70.68063811556806
186	haute	107.876	175	haute	90.195	2.320982389456757
187	ponctuee	75.123	176	ponctuee	65.495	0
188	basse	42.664	0	vide	42.664	33.07169947499311
189	basse	76.26	0	vide	76.26	31.827554324170944
190	basse	36.019	284	basse	34.853	4.752563271638126
191	ponctuee	99.135	174	basse	63.753	0
192	basse	93.532	0	vide	93.532	38.79089976088998
193	haute	107.623	226	haute	85.522	0
194	ponctuee	75.01	0	vide	75.01	14.898495838554489
195	basse	58.917	0	vide	58.917	69.68591270194584
196	ponctuee	46.217	171	ponctuee	48.373	2.703160586236849
197	ponctuee	60.859	166	haute	42.867	3.217931104979594
198	basse	39.065	165	basse	28.908	1.607913853713676
199	haute	69.408	163	haute	69.722	2.119454587860567
200	ponctuee	33.434	285	ponctuee	33.25	0.496726374379018
201	ponctuee	48.72	286	ponctuee	53.54	0.432545846325362
202	ponctuee	40.318	287	ponctuee	39.127	0.851504634747049
203	basse	25.31	288	basse	28.366	0
204	ponctuee	66.066	172	haute	69.206	0
205	ponctuee	20.282	173	haute	28.285	0
206	basse	58.886	161	ponctuee	50.506	7.738990231145486
207	basse	119.412	162	basse	108.63	7.601427788921828
208	basse	27.118	289	basse	26.807	8.60696033734572
209	ponctuee	354.716	159	haute	364.507	0
210	ponctuee	225.316	182	ponctuee	230.297	0
211	basse	99.751	183	basse	87.461	0
212	basse	43.546	167	basse	93.156	0
213	basse	62.914	0	vide	62.914	21.533849585817695
214	ponctuee	165.146	164	ponctuee	83.229	0.213096264997964
215	basse	59.355	160	ponctuee	110.284	0
216	ponctuee	124.288	158	ponctuee	104.44	0
217	basse	34.426	290	basse	36.446	1.140933187134846
218	basse	73.314	168	basse	37.763	0
219	basse	66.701	169	basse	77.491	0
220	basse	87.237	282	basse	86.668	0.964132733239603
221	alignement	100.499	178	alignement	85.994	0
222	ponctuee	68.98	227	haute	55.414	0.39609510702458
223	haute	37.738	229	haute	38.108	0.351282726884269
224	ponctuee	45.175	228	ponctuee	41.829	1.252514491882277
225	ponctuee	293.725	230	ponctuee	235.749	0
226	ponctuee	60.953	231	ponctuee	67.681	2.049269693398625
227	ponctuee	70.384	232	ponctuee	32.04	0.928347790523966
228	ponctuee	119.108	233	ponctuee	125.306	0.414820265165808
229	basse	55.654	234	ponctuee	67.564	0
230	ponctuee	94.791	239	ponctuee	89.011	0.275413695367058
231	haute	51.276	238	haute	78.056	0
232	ponctuee	64.721	236	ponctuee	51.097	0
233	ponctuee	82.722	249	ponctuee	88.357	0
234	ponctuee	68.519	240	ponctuee	97.388	0.898414037714848
235	basse	40.49	0	vide	40.49	19.317463401781495
236	ponctuee	82.658	241	haute	82.316	0
237	ponctuee	80	246	ponctuee	54.387	4.375266934731658
238	basse	58.223	245	ponctuee	51.58	0
239	basse	87.538	248	basse	34.541	0
240	basse	39.079	243	basse	42.207	0
241	ponctuee	329.29	244	haute	312.053	7.104427100394282
242	ponctuee	84.323	266	ponctuee	76.818	0.620699372025785
243	ponctuee	62.84	265	ponctuee	63.113	0
244	ponctuee	142.52	250	ponctuee	97.357	1.675585866699642
245	basse	39.104	264	basse	32.371	1.000201824105331
246	ponctuee	92.194	291	ponctuee	98.375	0
247	ponctuee	115.368	251	ponctuee	102.999	0.633494612302215
248	basse	53.931	254	ponctuee	31.157	0
249	basse	27.346	253	basse	35.476	3.395471730532432
250	basse	111.974	252	basse	47.848	2.631679353358841
251	haute	31.707	257	haute	38.906	0
252	ponctuee	17.182	256	ponctuee	26.642	0.769403629078021
253	ponctuee	55.55	0	vide	55.55	84.45209144839498
254	basse	51.844	0	vide	51.844	66.4596242372866
255	basse	37.059	0	vide	37.059	33.97941861702513
256	ponctuee	66.524	0	vide	66.524	19.18304412704588
257	haute	51.169	0	vide	51.169	1.409260186024607
258	haute	52.5	293	haute	51.511	0.220620752371702
259	alignement	97.676	0	vide	97.676	4.935113680738247
260	basse	34.819	292	ponctuee	37.676	1.012962557753727
261	ponctuee	52.027	0	vide	52.027	52.617671222942185
262	ponctuee	104.509	261	ponctuee	53.372	1.266083870852379
263	basse	174.594	259	ponctuee	185.682	0
264	ponctuee	95.412	0	vide	95.412	119.37470101777738
265	alignement	28.191	0	vide	28.191	76.27619773659285
266	haute	175.167	295	haute	183.261	0
267	ponctuee	40.402	296	haute	66.508	0.312269555649515
268	ponctuee	158.638	297	ponctuee	171.113	0
269	basse	100.653	214	haute	95.951	0
270	basse	88.121	299	basse	76.58	6.036712963403127
271	ponctuee	104.74	300	ponctuee	107.606	0
272	ponctuee	480.441	115	ponctuee	583.236	1.436516532066265
273	ponctuee	642.379	113	ponctuee	635.152	0
274	basse	63.004	0	vide	63.004	0
275	alignement	61.022	302	alignement	64.866	0
276	ponctuee	24.903	88	ponctuee	20.603	0
277	basse	38.513	135	basse	40.009	0
278	basse	45.499	60	basse	50.402	0
279	basse	46.471	0	vide	46.471	0
280	basse	52.046	137	basse	46.734	0
281	ponctuee	72.614	98	ponctuee	43.355	0
282	basse	35.826	221	ponctuee	33.019	0
283	basse	82.703	260	basse	172.807	0
284	vide	100.021	4	basse	100.021	0
285	vide	53.677	6	basse	53.677	0
286	vide	54.21	7	basse	54.21	0
287	vide	161.437	8	basse	161.437	0
288	vide	86.23	9	basse	86.23	0
289	vide	36.845	11	alignement	36.845	0
290	vide	109.222	13	ponctuee	109.222	0
291	vide	40.747	15	alignement	40.747	0
292	vide	102.989	16	alignement	102.989	0
293	vide	62.701	19	alignement	62.701	0
294	vide	88.579	20	alignement	88.579	0
295	vide	98.365	24	ponctuee	98.365	0
296	vide	67.113	27	ponctuee	67.113	0
297	vide	68.057	28	alignement	68.057	0
298	vide	50.175	36	ponctuee	50.175	0
299	vide	103.529	39	alignement	103.529	0
300	vide	98.024	40	alignement	98.024	0
301	vide	27.378	43	haute	27.378	0
302	vide	24.771	51	basse	24.771	0
303	vide	50.515	52	basse	50.515	0
304	vide	39.706	53	ponctuee	39.706	0
305	vide	105.765	61	basse	105.765	0
306	vide	23.463	62	basse	23.463	0
307	vide	130.285	71	ponctuee	130.285	0
308	vide	51.658	72	haute	51.658	0
309	vide	34.649	76	ponctuee	34.649	0
310	vide	72.845	77	basse	72.845	0
311	vide	79.259	78	ponctuee	79.259	0
312	vide	33.905	79	alignement	33.905	0
313	vide	85.45	81	ponctuee	85.45	0
314	vide	47.086	96	basse	47.086	0
315	vide	111.188	99	ponctuee	111.188	0
316	vide	121.408	102	basse	121.408	0
317	vide	60.71	117	basse	60.71	0
318	vide	54.775	118	ponctuee	54.775	0
319	vide	118.821	143	ponctuee	118.821	0
320	vide	62.24	144	ponctuee	62.24	0
321	vide	85.998	148	basse	85.998	0
322	vide	31.138	150	basse	31.138	0
323	vide	42.42	152	ponctuee	42.42	0
324	vide	81.767	156	ponctuee	81.767	0
325	vide	33.705	157	haute	33.705	0
326	vide	97.68	179	alignement	97.68	0
327	vide	64.013	180	ponctuee	64.013	0
328	vide	95.683	181	alignement	95.683	0
329	vide	43.81	184	basse	43.81	0
330	vide	56.362	186	basse	56.362	0
331	vide	48.961	189	basse	48.961	0
332	vide	76.175	191	basse	76.175	0
333	vide	22.069	197	basse	22.069	0
334	vide	72.112	198	ponctuee	72.112	0
335	vide	52.237	199	basse	52.237	0
336	vide	90.578	200	alignement	90.578	0
337	vide	84.504	202	basse	84.504	0
338	vide	70.483	210	haute	70.483	0
339	vide	236.976	211	alignement	236.976	0
340	vide	63.527	216	haute	63.527	0
341	vide	170.795	217	alignement	170.795	0
342	vide	51.975	218	ponctuee	51.975	0
343	vide	59.061	219	ponctuee	59.061	0
344	vide	60.2	222	basse	60.2	0
345	vide	27.528	225	ponctuee	27.528	0
346	vide	100.233	235	basse	100.233	0
347	vide	32.886	237	alignement	32.886	0
348	vide	156.14	242	haute	156.14	0
349	vide	64.635	247	ponctuee	64.635	0
350	vide	122.85	255	alignement	122.85	0
351	vide	52.124	258	alignement	52.124	0
352	vide	35.254	262	haute	35.254	0
353	vide	56.685	294	ponctuee	56.685	0
354	vide	70.518	298	haute	70.518	0
355	vide	55.488	303	ponctuee	55.488	0

## Sheet: Peri.Urban.2000_2019
id	Type_haie	Longueur	join_fid	join_Type_	join_Longu	distance
1	ponctuee	129.752	3	ponctuee	102.89	3.856344643693295
2	ponctuee	108.34	0	vide	108.34	5.856145956543751
3	ponctuee	285.4	0	vide	285.4	13.475339175478267
4	basse	100.021	0	vide	100.021	7.711974179936822
5	ponctuee	312.843	350	ponctuee	185.492	1.607204569063187
6	basse	53.677	34	basse	59.683	6.144302643906074
7	basse	54.21	36	ponctuee	43.938	5.176090507747332
8	basse	161.437	37	basse	158.326	4.555323613754403
9	basse	86.23	38	basse	101.326	0.052168150660354
10	ponctuee	134.032	44	ponctuee	131.083	0
11	alignement	36.845	42	alignement	41.757	0
12	alignement	151.139	0	vide	151.139	189.9549393891466
13	ponctuee	109.222	24	haute	117.488	0.46927149985569
14	alignement	50.13	22	alignement	57.216	0
15	alignement	40.747	23	alignement	44.169	0
16	alignement	102.989	25	alignement	87.903	0
17	haute	38.345	0	vide	38.345	22.591603407957127
18	alignement	42.243	9	alignement	40.557	3.074017816663857
19	alignement	62.701	0	vide	62.701	16.4966139489213
20	alignement	88.579	20	alignement	82.8	2.744713179620192
21	haute	89.593	19	haute	97.034	0
22	alignement	79.225	11	alignement	83.733	0
23	ponctuee	106.381	12	haute	103.129	0
24	ponctuee	98.365	329	ponctuee	119.067	0
25	alignement	75.646	0	vide	75.646	95.48721396598405
26	ponctuee	93.663	57	haute	97.801	0
27	ponctuee	67.113	58	ponctuee	141.512	0.174106953056497
28	alignement	68.057	69	haute	71.493	1.331589349435992
29	alignement	85.465	67	ponctuee	141.209	0
30	alignement	63.985	66	ponctuee	114.28	0
31	basse	51.481	368	basse	61.178	0
32	basse	95.973	65	basse	50.838	0.78641738584725
33	haute	69.831	62	haute	76.834	1.049953091751974
34	basse	36.006	63	basse	37.403	1.19451302304419
35	ponctuee	156.107	115	ponctuee	159.376	0.018919223739537
36	ponctuee	50.175	116	ponctuee	37.402	0.043122112792679
37	basse	98.41	0	vide	98.41	72.21274149229795
38	ponctuee	87.783	101	haute	136.794	0
39	alignement	103.529	103	alignement	104.399	2.254731751788705
40	alignement	98.024	0	vide	98.024	1.86222140255373
41	basse	71.008	104	basse	62.906	0
42	haute	206.86	105	haute	139.496	0
43	haute	27.378	106	haute	34.301	1.292621689843436
44	haute	73.167	114	haute	47.38	1.044334757784963
45	alignement	37.938	107	alignement	41.285	0
46	ponctuee	80.724	108	haute	96.647	0.370008040341157
47	basse	38.608	99	basse	36.415	0
48	alignement	43.555	98	alignement	47.202	0.172732547156373
49	alignement	35.746	96	alignement	34.541	1.252273662076294
50	alignement	44.547	50	alignement	48.238	1.525268599921036
51	basse	24.771	47	haute	23.512	0.598774621169702
52	basse	50.515	48	ponctuee	50.527	0.557174151858921
53	ponctuee	39.706	28	haute	52.022	0
54	alignement	24.845	21	alignement	27.812	3.134570929121147
55	basse	115.165	10	ponctuee	140.352	0
56	haute	83.629	55	haute	84.415	0
57	haute	103.518	54	haute	99.598	0
58	basse	70.074	18	ponctuee	69.356	0.470910827530195
59	ponctuee	43.474	71	ponctuee	54.293	0
60	basse	50.402	53	haute	52.362	0
61	basse	105.765	109	ponctuee	108.243	1.118750280059708
62	basse	23.463	331	ponctuee	45.255	0
63	ponctuee	55.508	332	haute	62.038	0
64	ponctuee	90.607	72	ponctuee	63.46	0
65	haute	42.043	89	haute	66.296	0.0587403684955
66	ponctuee	138.067	85	haute	218.372	0
67	ponctuee	43.221	334	ponctuee	34.028	1.19454088686948
68	haute	94.733	0	vide	94.733	18.418441186325346
69	basse	103.763	0	vide	103.763	103.37995482768251
70	ponctuee	115.506	78	haute	38.61	0
71	ponctuee	130.285	81	ponctuee	193.97	0
72	haute	51.658	0	vide	51.658	36.92060390204358
73	ponctuee	68.274	76	ponctuee	66.672	0
74	haute	92.78	77	haute	92.883	0.539180702431017
75	alignement	40.841	323	alignement	40.847	0.783609726631372
76	ponctuee	34.649	319	haute	29.537	1.707394761905795
77	basse	72.845	369	ponctuee	39.111	4.53013963110129
78	ponctuee	79.259	320	ponctuee	97.117	0
79	alignement	33.905	308	ponctuee	70.631	0.155724710216009
80	basse	110.213	0	vide	110.213	103.53115965263972
81	ponctuee	85.45	309	haute	64.563	0.478259552298076
82	basse	148.558	307	ponctuee	157.861	0
83	ponctuee	38.826	306	ponctuee	55.692	0
84	basse	43.187	305	basse	105.543	0
85	haute	60.961	303	haute	53.796	1.454066660096148
86	basse	47.104	0	vide	47.104	69.2972017964507
87	ponctuee	113.787	94	haute	113.499	0
88	ponctuee	20.603	93	ponctuee	20.286	1.840005068421066
89	basse	49.276	0	vide	49.276	33.756134215646945
90	alignement	72.008	302	alignement	74.052	0
91	ponctuee	77.355	301	ponctuee	99.323	0
92	ponctuee	38.673	0	vide	38.673	75.8854810363374
93	ponctuee	64.223	0	vide	64.223	8.072605779323103
94	ponctuee	78.676	0	vide	78.676	8.894088795797943
95	haute	18.505	335	haute	11.825	0.814754364417338
96	basse	47.086	293	basse	52.279	1.35505539578847
97	basse	135.859	292	basse	76.134	0
98	ponctuee	43.355	291	ponctuee	94.802	0
99	ponctuee	111.188	313	ponctuee	64.507	0.022637222036591
100	haute	48.097	0	vide	48.097	114.79686246130517
101	basse	131.592	190	haute	135.827	0
102	basse	121.408	189	basse	129.676	1.676425854825123
103	haute	89.295	188	haute	82.523	0
104	basse	76.109	187	ponctuee	68.158	0.430562023685866
105	basse	66.94	336	ponctuee	83.579	3.123412761357226
106	basse	465.131	186	basse	502.895	0
107	ponctuee	356.755	219	ponctuee	345.324	0
108	ponctuee	32.216	218	haute	36.665	0.489331977178814
109	basse	35.378	0	vide	35.378	73.8366071647698
110	alignement	51.557	213	alignement	47.366	0.042099171785108
111	basse	193.224	182	haute	203.075	0
112	basse	121.436	181	haute	118.999	0
113	ponctuee	635.152	199	ponctuee	40.775	0
114	ponctuee	157.785	180	haute	155.732	2.868121183466502
115	ponctuee	583.236	179	haute	577.711	0
116	ponctuee	846.933	201	ponctuee	837.198	0
117	basse	60.71	183	haute	48.467	0
118	ponctuee	54.775	185	ponctuee	292.432	0
119	alignement	273.897	315	ponctuee	264.579	0
120	alignement	20.245	197	alignement	18.502	0
121	alignement	99.648	196	alignement	97.423	0.233669938946042
122	basse	141.882	195	ponctuee	140.384	1.895499944306162
123	ponctuee	165.173	202	ponctuee	178.829	0.649770625890244
124	basse	37.359	0	vide	37.359	23.666444399215504
125	alignement	34.828	198	alignement	37.892	0.41101471670282
126	haute	110.513	194	haute	84.004	0
127	haute	86.355	192	haute	76.742	0
128	haute	99.782	191	haute	110.212	0
129	haute	67.531	337	haute	83.675	0.206319088659468
130	haute	95.919	0	vide	95.919	31.032061433707966
131	ponctuee	81.101	0	vide	81.101	17.701326661931496
132	basse	33.295	215	basse	30.246	0.042363278626758
133	basse	192.596	216	basse	131.209	0.537066985819264
134	basse	46.336	0	vide	46.336	4.436636830140327
135	basse	40.009	0	vide	40.009	6.011892470630023
136	haute	55.759	217	haute	56.531	0.45256462216369
137	basse	46.734	0	vide	46.734	118.34113694739688
138	ponctuee	274.806	228	ponctuee	271.767	0
139	ponctuee	191.264	230	ponctuee	37.642	0
140	ponctuee	98.918	233	haute	107.164	0
141	ponctuee	75.897	234	basse	81.84	1.587759714031571
142	basse	148.93	236	basse	149.62	0
143	ponctuee	118.821	237	haute	120.046	0.482623575643577
144	ponctuee	62.24	239	ponctuee	62.514	0
145	ponctuee	181.808	235	ponctuee	182.946	0
146	alignement	49.608	240	alignement	52.414	0
147	ponctuee	142.138	241	ponctuee	162.582	0
148	basse	85.998	338	basse	68.983	1.465157127455911
149	basse	118.153	220	basse	108.768	0
150	basse	31.138	223	basse	34.662	0.444052702380955
151	basse	25.426	227	basse	35.559	0
152	ponctuee	42.42	229	ponctuee	40.924	0.533471609441579
153	basse	159.847	242	basse	107.599	0
154	ponctuee	97.17	244	ponctuee	131.408	0
155	basse	103.124	245	basse	98.576	0
156	ponctuee	81.767	256	ponctuee	80.207	0.785273364421373
157	haute	33.705	249	haute	31.568	1.990306148386273
158	ponctuee	104.44	252	ponctuee	104.673	0
159	haute	364.507	251	haute	376.171	0
160	ponctuee	110.284	253	ponctuee	284.711	0
161	ponctuee	50.506	171	haute	61.884	0.086417791581836
162	basse	108.63	164	ponctuee	70.477	0
163	haute	69.722	163	haute	51.784	0.569675444759475
164	ponctuee	83.229	0	vide	83.229	116.90962089916125
165	basse	28.908	0	vide	28.908	67.79038405349897
166	haute	42.867	161	haute	48.491	0
167	basse	93.156	162	haute	104.269	0
168	basse	37.763	156	ponctuee	68.693	0
169	basse	77.491	158	basse	79.362	0
170	haute	66.111	357	haute	59.862	0
171	ponctuee	48.373	160	haute	80.025	1.39504637688258
172	haute	69.206	173	haute	75.59	0
173	haute	28.285	174	haute	27.34	0
174	basse	63.753	166	haute	71.95	0
175	haute	90.195	167	haute	74.877	0
176	ponctuee	65.495	0	vide	65.495	18.412746278121194
177	basse	50.446	175	basse	59.227	0
178	alignement	85.994	311	basse	73.624	0
179	alignement	97.68	327	alignement	103.526	0
180	ponctuee	64.013	312	ponctuee	76.398	0
181	alignement	95.683	328	alignement	80.695	0
182	ponctuee	230.297	246	ponctuee	198.171	0
183	basse	87.461	248	basse	98.753	0
184	basse	43.81	254	ponctuee	39.435	0
185	ponctuee	64.59	261	ponctuee	212.561	0
186	basse	56.362	339	ponctuee	38.59	0
187	ponctuee	144.347	257	ponctuee	159.239	0
188	basse	96.94	258	basse	107.206	0
189	basse	48.961	0	vide	48.961	5.454156485528133
190	ponctuee	128.237	259	haute	126.499	0
191	basse	76.175	262	ponctuee	79.151	0
192	alignement	32.512	325	alignement	23.705	0.917576598926268
193	alignement	47.678	263	alignement	44.512	0
194	haute	119.736	0	vide	119.736	59.343399626525844
195	haute	112.463	0	vide	112.463	15.33435370275278
196	ponctuee	47.103	0	vide	47.103	129.13715300802448
197	basse	22.069	370	basse	24.207	158.6056795033596
198	ponctuee	72.112	260	ponctuee	107.525	0
199	basse	52.237	324	ponctuee	53.45	0.60067889966269
200	alignement	90.578	210	alignement	89.783	0
201	alignement	84.543	266	alignement	79.053	0
202	basse	84.504	265	ponctuee	73.396	0.214981603959469
203	basse	42.157	264	ponctuee	68.142	0
204	ponctuee	119.924	268	haute	88.114	0
205	haute	143.803	277	haute	160.283	0
206	ponctuee	163.614	0	vide	163.614	4.506870618165575
207	ponctuee	188.326	282	ponctuee	148.867	0
208	haute	499.507	281	haute	477.463	0
209	haute	95.181	340	haute	89.689	0
210	haute	70.483	274	haute	74.066	0
211	alignement	236.976	273	alignement	268.665	0
212	alignement	79.186	279	alignement	107.193	0
213	haute	375.601	271	haute	353.097	0
214	haute	95.951	290	haute	80.934	0
215	haute	50.477	272	haute	47.488	0
216	haute	63.527	316	haute	102.552	1.158071737695614
217	alignement	170.795	278	alignement	176.136	0
218	ponctuee	51.975	289	haute	30.748	0.077337685743826
219	ponctuee	59.061	341	haute	63.591	0
220	haute	138.791	280	haute	148.838	0
221	ponctuee	33.019	318	ponctuee	34.704	0.750598367502287
222	basse	60.2	296	ponctuee	74.008	0.673478959752395
223	basse	31.142	0	vide	31.142	37.38320126381811
224	alignement	63.678	314	alignement	73.498	0
225	ponctuee	27.528	0	vide	27.528	121.51840785725939
226	haute	85.522	342	haute	93.029	0
227	haute	55.414	343	haute	63.7	0.290151550523708
228	ponctuee	41.829	0	vide	41.829	8.10043416540928
229	haute	38.108	155	haute	42.703	0
230	ponctuee	235.749	153	ponctuee	154.546	0
231	ponctuee	67.681	149	haute	70.343	0
232	ponctuee	32.04	0	vide	32.04	16.087842034086655
233	ponctuee	125.306	141	haute	129.341	0
234	ponctuee	67.564	142	haute	69.091	0
235	basse	100.233	136	basse	64.877	0
236	ponctuee	51.097	138	haute	31.908	0
237	alignement	32.886	140	alignement	39.095	1.512893537150343
238	haute	78.056	139	haute	124.673	0
239	ponctuee	89.011	137	ponctuee	92.254	0.038007105430697
240	ponctuee	97.388	145	ponctuee	70.03	0
241	haute	82.316	147	haute	82.63	0
242	haute	156.14	0	vide	156.14	27.684889176109344
243	basse	42.207	285	haute	57.553	0
244	haute	312.053	283	haute	313.935	0
245	ponctuee	51.58	288	haute	45.172	0.087007534803276
246	ponctuee	54.387	344	ponctuee	50.605	0.823143357098713
247	ponctuee	64.635	286	haute	95.59	0.502481764976923
248	basse	34.541	148	ponctuee	111.588	0.234285255389895
249	ponctuee	88.357	345	haute	91.781	0
250	ponctuee	97.357	347	haute	174.18	0
251	ponctuee	102.999	131	ponctuee	103.743	0
252	basse	47.848	127	alignement	62.284	0
253	basse	35.476	128	haute	35.702	0
254	ponctuee	31.157	130	haute	32.424	2.602075999464139
255	alignement	122.85	129	alignement	122.651	0
256	ponctuee	26.642	126	ponctuee	150.019	0
257	haute	38.906	125	haute	23.43	0.748246527725656
258	alignement	52.124	346	alignement	48.729	1.32752430110159
259	ponctuee	185.682	119	ponctuee	176.912	0
260	basse	172.807	124	basse	193.382	0
261	ponctuee	53.372	120	haute	78.324	0
262	haute	35.254	0	vide	35.254	74.73373259338175
263	ponctuee	91.081	112	ponctuee	41.843	1.275172132251419
264	basse	32.371	132	ponctuee	37.103	0.182668563226336
265	ponctuee	63.113	348	haute	62.855	0
266	ponctuee	76.818	349	ponctuee	79.216	0
267	haute	56.136	0	vide	56.136	8.454290683191008
268	ponctuee	62.614	0	vide	62.614	23.44995231139637
269	ponctuee	182.013	351	ponctuee	175.776	0
270	ponctuee	103.429	0	vide	103.429	72.5321110628178
271	ponctuee	200.09	352	haute	196.529	0
272	haute	32.129	0	vide	32.129	53.06590801119439
273	haute	27.093	0	vide	27.093	3.258550026397354
274	haute	99.551	353	basse	51.727	0.086717712622219
275	ponctuee	44.797	354	haute	39.377	0
276	basse	59.01	310	ponctuee	55.518	0
277	ponctuee	71.157	355	ponctuee	73.141	0
278	ponctuee	79.177	0	vide	79.177	68.22220572047388
279	ponctuee	48.517	356	ponctuee	65.91	0
280	basse	29.877	0	vide	29.877	8.508202577621276
281	ponctuee	68.794	0	vide	68.794	5.788530478186995
282	basse	86.668	157	basse	139.078	0
283	haute	122.526	358	haute	82.265	4.361805345871928
284	basse	34.853	359	basse	32.616	1.169735473910986
285	ponctuee	33.25	0	vide	33.25	86.74047429782337
286	ponctuee	53.54	0	vide	53.54	55.174240310909234
287	ponctuee	39.127	0	vide	39.127	27.759598526267563
288	basse	28.366	371	ponctuee	24.219	114.96891837719652
289	basse	26.807	0	vide	26.807	109.7416963507899
290	basse	36.446	159	ponctuee	38.274	0
291	ponctuee	98.375	360	ponctuee	102.177	0
292	ponctuee	37.676	0	vide	37.676	43.59042191819591
293	haute	51.511	0	vide	51.511	9.142104173880131
294	ponctuee	56.685	361	haute	67.017	0
295	haute	183.261	362	haute	184.535	0
296	haute	66.508	363	haute	72.233	0
297	ponctuee	171.113	364	haute	176.489	0
298	haute	70.518	365	haute	54.039	0
299	basse	76.58	35	ponctuee	78.74	0
300	ponctuee	107.606	367	ponctuee	103.187	0
301	ponctuee	111.717	111	ponctuee	108.063	1.390462681711819
302	alignement	64.866	64	alignement	68.531	0
303	ponctuee	55.488	208	ponctuee	84.817	0
304	vide	13.385	1	alignement	13.385	0
305	vide	44.702	2	ponctuee	44.702	0
306	vide	151.32	4	alignement	151.32	0
307	vide	172.495	5	alignement	172.495	0
308	vide	32.575	6	alignement	32.575	0
309	vide	35.307	7	basse	35.307	0
310	vide	18.497	8	basse	18.497	0
311	vide	195.527	13	ponctuee	195.527	0
312	vide	25.6	14	alignement	25.6	0
313	vide	133.703	15	ponctuee	133.703	0
314	vide	82.548	16	ponctuee	82.548	0
315	vide	82.158	17	haute	82.158	0
316	vide	46.079	26	haute	46.079	0
317	vide	43.849	27	haute	43.849	0
318	vide	134.909	29	ponctuee	134.909	0
319	vide	89.905	30	ponctuee	89.905	0
320	vide	43.744	31	basse	43.744	0
321	vide	58.528	32	ponctuee	58.528	0
322	vide	14.865	33	basse	14.865	0
323	vide	26.712	39	basse	26.712	0
324	vide	88.848	40	ponctuee	88.848	0
325	vide	184.218	41	haute	184.218	0
326	vide	50.075	43	ponctuee	50.075	0
327	vide	98.665	45	ponctuee	98.665	0
328	vide	271.705	46	basse	271.705	0
329	vide	110.746	49	ponctuee	110.746	0
330	vide	104.048	51	ponctuee	104.048	0
331	vide	40.79	52	ponctuee	40.79	0
332	vide	29.457	56	basse	29.457	0
333	vide	51.825	59	ponctuee	51.825	0
334	vide	50.868	60	ponctuee	50.868	0
335	vide	12.812	61	basse	12.812	0
336	vide	88.91	68	basse	88.91	0
337	vide	34.924	70	basse	34.924	0
338	vide	155.407	73	ponctuee	155.407	0
339	vide	137.718	74	ponctuee	137.718	0
340	vide	67.001	75	ponctuee	67.001	0
341	vide	163.953	79	haute	163.953	0
342	vide	18.285	80	ponctuee	18.285	0
343	vide	62.057	82	ponctuee	62.057	0
344	vide	52.433	83	basse	52.433	0
345	vide	35.773	84	alignement	35.773	0
346	vide	89.865	86	ponctuee	89.865	0
347	vide	114.477	87	alignement	114.477	0
348	vide	103.974	88	alignement	103.974	0
349	vide	114.785	90	basse	114.785	0
350	vide	132.451	91	basse	132.451	0
351	vide	149.566	92	basse	149.566	0
352	vide	26.327	95	haute	26.327	0
353	vide	60.851	97	ponctuee	60.851	0
354	vide	80.755	100	basse	80.755	0
355	vide	90.515	102	basse	90.515	0
356	vide	42.411	110	ponctuee	42.411	0
357	vide	157.12	113	alignement	157.12	0
358	vide	61.006	117	basse	61.006	0
359	vide	58.888	118	haute	58.888	0
360	vide	34.228	121	basse	34.228	0
361	vide	106.168	122	basse	106.168	0
362	vide	41.01	123	basse	41.01	0
363	vide	31.337	133	ponctuee	31.337	0
364	vide	45.338	134	haute	45.338	0
365	vide	50.835	135	haute	50.835	0
366	vide	40.937	143	basse	40.937	0
367	vide	41.421	144	ponctuee	41.421	0
368	vide	66.568	146	basse	66.568	0
369	vide	52.674	150	haute	52.674	0
370	vide	24.367	151	basse	24.367	0
371	vide	81.614	152	basse	81.614	0
372	vide	120.027	154	ponctuee	120.027	0
373	vide	66.334	165	basse	66.334	0
374	vide	56.503	168	ponctuee	56.503	0
375	vide	47.214	169	basse	47.214	0
376	vide	34.031	170	ponctuee	34.031	0
377	vide	20.905	172	basse	20.905	0
378	vide	50.715	176	basse	50.715	0
379	vide	38.845	177	basse	38.845	0
380	vide	103.282	178	basse	103.282	0
381	vide	74.94	184	ponctuee	74.94	0
382	vide	82.625	193	ponctuee	82.625	0
383	vide	34.648	200	basse	34.648	0
384	vide	62.552	203	ponctuee	62.552	0
385	vide	33.582	204	basse	33.582	0
386	vide	88.714	205	ponctuee	88.714	0
387	vide	134.51	206	ponctuee	134.51	0
388	vide	124.417	207	alignement	124.417	0
389	vide	161.288	209	alignement	161.288	0
390	vide	23.827	211	basse	23.827	0
391	vide	47.237	212	ponctuee	47.237	0
392	vide	83.369	214	ponctuee	83.369	0
393	vide	34.213	221	ponctuee	34.213	0
394	vide	48.905	222	basse	48.905	0
395	vide	29.693	224	basse	29.693	0
396	vide	18.468	225	basse	18.468	0
397	vide	54.214	226	basse	54.214	0
398	vide	37.146	231	basse	37.146	0
399	vide	108.483	232	ponctuee	108.483	0
400	vide	49.07	238	ponctuee	49.07	0
401	vide	106.714	243	ponctuee	106.714	0
402	vide	24.443	247	haute	24.443	0
403	vide	57.305	250	ponctuee	57.305	0
404	vide	27.167	255	alignement	27.167	0
405	vide	33.038	267	basse	33.038	0
406	vide	31.306	269	basse	31.306	0
407	vide	85.623	270	basse	85.623	0
408	vide	74.281	275	alignement	74.281	0
409	vide	74.908	276	alignement	74.908	0
410	vide	73.826	284	basse	73.826	0
411	vide	119.89	287	basse	119.89	0
412	vide	66.423	294	basse	66.423	0
413	vide	59.425	295	ponctuee	59.425	0
414	vide	38.709	297	basse	38.709	0
415	vide	39.429	298	ponctuee	39.429	0
416	vide	58.777	299	basse	58.777	0
417	vide	57.2	300	basse	57.2	0
418	vide	111.414	304	ponctuee	111.414	0
419	vide	35.306	317	haute	35.306	0
420	vide	46.508	321	alignement	46.508	0
421	vide	18.184	322	alignement	18.184	0
422	vide	140.595	326	ponctuee	140.595	0
423	vide	32.062	330	alignement	32.062	0
424	vide	42.656	333	ponctuee	42.656	0
425	vide	21.734	366	ponctuee	21.734	0

## Sheet: Rural.1989_2000
fid	Type_haie	Longueur	join_fid	join_Type_	join_Longu	distance
1	ponctuee	76.70711352721052	1	ponctuee	204.7327657992108	0
2	ponctuee	35.17897368181227	0	vide	35.17897368181227	13.889219498244103
3	basse	62.54247414121192	6	basse	62.22226710573968	2.575032051977911
4	ponctuee	61.1296129137039	5	ponctuee	59.2526139399201	0.569738805728576
5	alignement	55.04808536672969	4	alignement	55.818208606528984	0.512858043489429
6	ponctuee	205.79897776499467	7	ponctuee	109.32228742473612	0.631594085976727
7	ponctuee	602.7686051556815	2	ponctuee	598.6787658980277	0
8	alignement	64.74520127922585	3	alignement	61.55079902475661	0.637476273474622
9	haute	33.909282028963	8	haute	47.29588039724795	0.846436531730495
10	haute	25.889200466357664	0	vide	25.889200466357664	17.897608919870972
11	basse	25.704426925586834	0	vide	25.704426925586834	40.87018721865899
12	haute	76.07520548165301	14	haute	84.8923581248387	0
13	haute	94.86178703454254	15	haute	93.67359573469932	2.083569456714685
14	basse	66.30937549495047	0	vide	66.30937549495047	27.057397312264715
15	ponctuee	26.519306262918576	16	ponctuee	29.618366125899936	0.590691534592709
16	alignement	60.904082914554856	18	ponctuee	75.42843886688057	0
17	alignement	58.10447330155053	19	alignement	58.39406641064486	0
18	alignement	41.0925295503105	21	haute	43.31409513513755	0.067007683168939
19	alignement	42.31790519682513	20	haute	49.80444488146727	0.021552050001987
20	haute	47.76496621821568	189	haute	51.51973243446558	3.571295426559698
21	ponctuee	89.69883706849981	22	haute	102.36588447490838	0
22	ponctuee	217.30615727578964	25	ponctuee	226.74716463753376	0
23	alignement	83.3368492827008	28	alignement	134.92964146886476	0
24	alignement	151.05270815852543	29	alignement	157.89247864743004	0
25	basse	217.1613596251808	30	haute	205.77942360058267	0.775456444025115
26	ponctuee	80.00372540902455	31	ponctuee	155.08631358668742	0
27	alignement	123.67499010678463	32	haute	128.12001884175405	0.218146232905526
28	ponctuee	92.02984823463171	36	ponctuee	110.65828879679881	0
29	haute	100.52263477742119	33	haute	111.8281213414424	0
30	haute	100.27603676768493	0	vide	100.27603676768493	6.308694759036245
31	haute	46.694649035796985	35	ponctuee	44.6260637095631	0.868786512722737
32	ponctuee	47.43899147352551	190	ponctuee	58.46916420400249	0.193343759270847
33	alignement	58.845176557014995	191	ponctuee	61.67647024239132	1.455835367842985
34	ponctuee	105.32881113667968	41	basse	132.07542754659494	3.761034839135095
35	ponctuee	76.93760647739978	0	vide	76.93760647739978	7.862238238704316
36	alignement	36.2755447722899	0	vide	36.2755447722899	20.51359671958698
37	alignement	63.02717301825346	0	vide	63.02717301825346	32.71648120660282
38	alignement	40.946654001240425	0	vide	40.946654001240425	21.405526161951972
39	alignement	107.83940516604996	39	alignement	104.63566272628174	2.534534880878994
40	alignement	100.84388898889674	40	alignement	101.94072403033529	4.986521771012544
41	basse	45.30506213325178	0	vide	45.30506213325178	38.34169538681549
42	basse	23.79798118715131	0	vide	23.79798118715131	113.80545301113878
43	alignement	32.107342615868546	46	alignement	33.64556372289377	3.867022340724005
44	alignement	27.711946539834774	47	alignement	27.998619658764166	3.450249047261095
45	alignement	23.376232118179058	48	alignement	24.911843271403058	0.296994038425066
46	alignement	319.334027736455	44	alignement	318.9061853761781	1.435305624275949
47	alignement	38.9732593544815	43	alignement	41.07038299305471	1.088182051283857
48	alignement	71.63657263728773	0	vide	71.63657263728773	470.3554255824421
49	alignement	42.731915012881736	37	alignement	48.30227156311951	1.272790031891196
50	basse	72.88647642372005	0	vide	72.88647642372005	106.13423401962345
51	basse	44.74089937419222	26	basse	63.58596596849684	1.578835050168061
52	basse	134.77736514492062	13	haute	143.49895462106926	0.01109863585001
53	alignement	30.978722371474188	139	alignement	29.51611446569794	0.6489709746721
54	alignement	308.59703258441965	140	alignement	235.70357510167662	0
55	ponctuee	204.88142836130595	24	ponctuee	201.56174023358957	0
56	ponctuee	68.3664168359997	0	vide	68.3664168359997	267.6796968152809
57	haute	174.92448637980772	93	haute	173.5378700016836	0.846990863677922
58	haute	69.36340486364728	94	haute	70.75251222776974	8.14476198076601
59	ponctuee	192.00914127823344	96	ponctuee	195.65504424871511	0
60	ponctuee	79.54898519161861	95	ponctuee	94.2461744044063	0.702907479673667
61	alignement	63.48999959253564	0	vide	63.48999959253564	8.813064205706045
62	alignement	73.46792341875638	99	alignement	53.98209870121402	0.095784837588943
63	haute	63.09088498065278	100	haute	68.1001308895474	0.767871073843955
64	haute	118.83904295166488	187	haute	87.41586943717478	0
65	ponctuee	123.70083004469241	101	haute	120.79630323095137	0
66	basse	36.65737206950523	90	basse	45.09243147750524	0.838513543577354
67	haute	39.448823809679446	91	haute	44.752376668029825	0
68	ponctuee	40.430072819712635	0	vide	40.430072819712635	180.47726776794585
69	basse	93.29362617115598	89	basse	72.02811761138183	1.817519173832899
70	alignement	216.1668914893544	78	alignement	209.5908952831549	3.806235684349441
71	ponctuee	22.09812622476427	97	ponctuee	61.28828752416376	5.795183174010216
72	ponctuee	113.60268688422643	88	ponctuee	114.43243577648815	0.254342696923489
73	alignement	65.85415068820662	0	vide	65.85415068820662	73.02389926489701
74	alignement	142.2167564475686	81	alignement	152.0693622496316	1.712713675237405
75	alignement	64.06216247005685	0	vide	64.06216247005685	70.00114997534799
76	alignement	59.01628926127579	82	alignement	54.589400565742125	0
77	haute	121.81056923020296	80	ponctuee	127.95816241242412	0
78	haute	69.00309628259974	83	alignement	68.66535651342204	0
79	ponctuee	108.6597059958301	84	ponctuee	111.97811069249374	0.278266283965505
80	alignement	106.62927455657587	86	alignement	105.50265055561242	0.616954930905136
81	ponctuee	41.38263268881638	0	vide	41.38263268881638	20.855810878368242
82	alignement	35.664501808734265	87	alignement	61.88902581435739	1.042825660156724
83	haute	148.66685715459332	72	haute	148.32056546447598	0
84	ponctuee	219.2393663204831	69	haute	211.68786142014437	0.016689283624942
85	haute	31.479092618981287	0	vide	31.479092618981287	33.62221668891844
86	haute	44.94046619013477	194	haute	42.46836657212856	1.218456373986468
87	ponctuee	53.18624730317354	67	ponctuee	47.311080875017744	0
88	ponctuee	101.94472687350778	68	ponctuee	92.76574031957122	0.065067514588019
89	haute	44.0705494096603	0	vide	44.0705494096603	67.496838131035
90	haute	46.24345182090559	0	vide	46.24345182090559	74.95711635246536
91	alignement	322.63508006932256	76	alignement	317.10176271857125	0.137924125092613
92	basse	69.99318004317236	66	basse	75.40926712607076	0
93	basse	88.35255753481215	65	ponctuee	70.83049868487515	1.501170183649764
94	haute	126.93280147001927	102	haute	95.24944411837271	0
95	haute	161.70489565217983	64	haute	160.38102591529162	0
96	alignement	106.05420617680588	103	alignement	133.30605332433333	0
97	ponctuee	100.11156871295037	111	haute	115.30808184103805	0
98	ponctuee	81.57945834412122	174	ponctuee	75.07182600074177	0
99	haute	123.05661388405981	179	haute	91.32531093857558	0
100	haute	55.36376669970544	178	haute	59.35288712647794	0
101	haute	83.99407343016641	0	vide	83.99407343016641	25.16052146320152
102	ponctuee	59.22465875185462	0	vide	59.22465875185462	6.661464922889546
103	basse	88.5613351500665	0	vide	88.5613351500665	33.214253844564716
104	ponctuee	109.80215701818125	0	vide	109.80215701818125	8.851769510022335
105	haute	30.550920532557797	193	haute	29.141902503431734	0
106	ponctuee	293.2098537510528	192	haute	300.89363407116804	1.041348974671817
107	alignement	88.60918926067984	0	vide	88.60918926067984	10.265401751453865
108	ponctuee	174.44186694461288	184	ponctuee	156.4871519002838	0
109	haute	42.4904973171764	56	haute	44.573350777609704	2.034742073630944
110	ponctuee	125.55501034367089	57	haute	123.13074924710466	0
111	haute	62.21875952424568	180	haute	59.54506366662402	0
112	haute	116.4994878186026	0	vide	116.4994878186026	16.44471644255759
113	haute	66.93102200171536	0	vide	66.93102200171536	81.64673381619257
114	alignement	46.96742271464568	54	alignement	47.57596284923447	0.232852331586767
115	alignement	56.464297015163424	0	vide	56.464297015163424	89.64983403873258
116	alignement	80.50960893676604	205	basse	122.0739611551073	139.95394827587967
117	alignement	56.924317056049546	113	alignement	59.00626581270116	0.334390068385553
118	alignement	39.48109326338242	0	vide	39.48109326338242	11.0999522569218
119	ponctuee	280.27750325854527	114	ponctuee	273.80259264967054	0
120	ponctuee	516.8620051966865	116	haute	515.8243959074393	0
121	ponctuee	74.4719551131263	172	basse	64.70026093282013	2.551269124081015
122	ponctuee	57.50329158616832	117	ponctuee	47.7335996348037	0.334200592981428
123	alignement	67.49714600912897	118	alignement	60.09636643602273	0
124	alignement	80.11623601028712	0	vide	80.11623601028712	125.18793166221366
125	basse	48.556313931227365	125	basse	20.342048313261117	1.839543827407762
126	basse	61.28442344463257	0	vide	61.28442344463257	15.268186442764126
127	basse	17.2948689080297	121	basse	31.343749225597513	2.049257488361306
128	ponctuee	124.74215428644843	120	basse	57.48743352925467	0
129	haute	106.713316282332	199	ponctuee	21.63072558465706	0.144545893861126
130	basse	130.53908316122389	0	vide	130.53908316122389	4.047809231936894
131	haute	220.64675392524035	0	vide	220.64675392524035	100.44086308742894
132	basse	178.15147186378698	126	basse	18.293716658043028	0.300348753263136
133	alignement	276.0352219808811	119	alignement	276.92139902539634	0.144748838101363
134	basse	30.23024898209929	0	vide	30.23024898209929	0.623590202549601
135	alignement	29.027027330046042	133	alignement	28.42624575635414	2.090082314203238
136	basse	219.97161181576948	0	vide	219.97161181576948	33.815094014782126
137	haute	156.69352516995602	124	basse	79.93817535609516	0.168935176128686
138	haute	65.26188776951149	129	basse	64.50122063550921	0.358477467594697
139	alignement	50.56641428655065	135	alignement	42.836129462032964	0.180779906289658
140	alignement	73.19767779437366	134	alignement	78.38029146732077	0
141	alignement	17.9527672584864	0	vide	17.9527672584864	44.4586981904154
142	alignement	273.87711961281747	137	alignement	278.3745894310711	0
143	haute	268.2554882682137	144	basse	229.55325223544583	0.777102347563679
144	alignement	136.0977227654222	138	alignement	184.8825810024138	0
145	alignement	192.9909896398941	141	alignement	197.1365190155204	0
146	alignement	21.969062237663973	142	alignement	114.76726598664105	0
147	basse	218.39784343911978	153	basse	221.19968887850487	0
148	basse	102.35263758360034	154	basse	66.57829148863514	0
149	alignement	63.47471984983254	150	alignement	61.66006627268044	0
150	alignement	17.323605247003165	151	alignement	17.345680685800673	0
151	alignement	33.471176887220196	152	alignement	30.152796177256324	0.030021154743932
152	ponctuee	244.5690466600804	147	haute	257.5952628855374	0
153	haute	58.30873582086776	196	haute	59.283067734090096	0
154	ponctuee	74.52727426438136	146	haute	73.2435801283444	0.203931826208602
155	ponctuee	69.3035161466274	132	ponctuee	44.48280116644975	0
156	ponctuee	108.00511862876878	130	basse	65.47295775602927	0
157	haute	148.30615876134215	157	basse	132.77499537974342	1.753716320994506
158	ponctuee	117.07233309117282	156	basse	139.38926889858743	0
159	ponctuee	123.87112905048683	158	ponctuee	139.5124776948192	0.829797934137073
160	basse	23.204333896773253	0	vide	23.204333896773253	82.46009830874684
161	basse	82.35210412302254	149	basse	41.26511024950685	0.47898891934869
162	basse	83.18376475102605	148	basse	87.0555000734502	0
163	basse	48.63215658373141	0	vide	48.63215658373141	0.512858043489429
164	ponctuee	86.78361540451588	123	haute	97.49971766755179	0
165	ponctuee	90.03517017836782	168	ponctuee	116.21365918575187	0.031444828498185
166	haute	93.7000573365045	159	ponctuee	93.66360064471853	0
167	alignement	57.36309838097326	167	alignement	56.87095871108338	0.774197526901452
168	basse	49.622747092591304	0	vide	49.622747092591304	129.1770077597695
169	ponctuee	37.045515792285194	0	vide	37.045515792285194	14.527959274595597
170	ponctuee	37.64402706246043	0	vide	37.64402706246043	13.981332887540235
171	haute	90.42593604477138	0	vide	90.42593604477138	25.132225962535184
172	ponctuee	94.50924215121071	0	vide	94.50924215121071	59.25785363424051
173	ponctuee	202.7338849058866	0	vide	202.7338849058866	2.767309063468291
174	basse	156.72506336883575	162	basse	141.77602730115473	0
175	ponctuee	56.97425472312407	160	ponctuee	63.73621970350695	0.632682172311454
176	basse	95.14405890347767	161	basse	98.37853343092115	0
177	haute	69.89800445075318	206	haute	35.0721848758479	7.715984051110386
178	ponctuee	75.2877560880776	0	vide	75.2877560880776	10.245076535371869
179	basse	13.670499142132378	197	basse	10.677592683270735	0
180	ponctuee	57.103742900283606	0	vide	57.103742900283606	103.05597136408736
181	basse	99.14008070905085	182	basse	95.63674866370562	0
182	ponctuee	72.0289642893343	0	vide	72.0289642893343	42.58500527091881
183	basse	205.0173441105003	0	vide	205.0173441105003	9.784459961396808
184	basse	37.084575688006325	0	vide	37.084575688006325	5.221877529429475
185	basse	45.88578925999535	52	basse	13.805993796459399	2.074865986566321
186	ponctuee	37.43108113424345	171	ponctuee	35.91168169461341	1.072159782209553
187	haute	73.7005426685882	0	vide	73.7005426685882	8.500224703445605
188	basse	33.34284143895967	0	vide	33.34284143895967	66.3543876260068
189	ponctuee	46.47688298689921	0	vide	46.47688298689921	65.30995716741324
190	basse	92.6512189222442	23	basse	82.09747994298118	0
191	haute	19.04388593105925	183	haute	22.522942688557247	3.81153755997435
192	ponctuee	119.52912526386504	45	ponctuee	123.30734474467314	0.656170063819714
193	basse	107.53009630658191	49	basse	106.36877568117622	0
194	ponctuee	142.6482035743061	27	ponctuee	42.220884723494756	0.417190504300172
195	haute	95.75794137022265	0	vide	95.75794137022265	48.740522735126234
196	ponctuee	30.988903955656045	0	vide	30.988903955656045	43.511818139570146
197	ponctuee	33.561442348909566	70	haute	27.60950157218908	0
198	ponctuee	21.671270980985447	71	basse	17.669435719141923	1.326495311032939
199	haute	55.804272088783456	185	haute	43.9931416189892	0.176852377071948
200	ponctuee	57.38212849615877	98	ponctuee	56.467774792633406	0.467702312377058
201	ponctuee	68.20186919223127	186	ponctuee	40.84934732200831	0.976319868653357
202	haute	47.215682915597306	51	ponctuee	57.39118594842656	0.221545475669989
203	ponctuee	149.89579930176174	131	ponctuee	130.93555359633544	0.532399822289519
204	ponctuee	35.287521105922906	164	haute	20.08987915246224	2.388530646164531
205	ponctuee	80.84849404978166	73	ponctuee	73.49892363270101	0.297550616673482
206	haute	38.4513173480383	74	haute	76.91599700583859	0
207	ponctuee	70.6069172583392	75	haute	73.80244905412722	0.423085447620573
208	alignement	37.27479928493721	79	alignement	41.62223634243763	0.013423691285254
209	haute	52.15413194676965	108	alignement	47.010394343416344	2.018598605773008
210	haute	115.64441446846703	0	vide	115.64441446846703	7.493498547909616
211	basse	58.33000536041924	109	basse	133.38430865692058	0.258694266225113
212	basse	23.764865882489875	110	basse	20.3399958970558	0.162858780429629
213	alignement	15.148054535420567	143	alignement	15.14964221368641	1.629167504789879
214	alignement	14.006714391217066	176	alignement	38.46236970122908	1.426310605404703
215	ponctuee	30.481898662643847	42	ponctuee	95.90548614119078	3.73811499335925
216	alignement	525.1188245372131	136	alignement	528.0458693677692	0
217	alignement	45.84382871492999	200	alignement	45.92953339716831	0
218	vide	67.50551322584629	9	ponctuee	67.50551322584629	0
219	vide	75.64165629949501	10	basse	75.64165629949501	0
220	vide	29.333164980690714	11	basse	29.333164980690714	0
221	vide	96.00033636491082	12	basse	96.00033636491082	0
222	vide	117.7198212501395	17	basse	117.7198212501395	0
223	vide	85.40548435853292	34	ponctuee	85.40548435853292	0
224	vide	39.90818593419291	38	basse	39.90818593419291	0
225	vide	93.17189115390265	50	basse	93.17189115390265	0
226	vide	53.24843347377134	53	alignement	53.24843347377134	0
227	vide	81.69059045033822	55	ponctuee	81.69059045033822	0
228	vide	49.919572959747384	58	alignement	49.919572959747384	0
229	vide	41.582712974618325	59	alignement	41.582712974618325	0
230	vide	47.825841891335585	60	ponctuee	47.825841891335585	0
231	vide	58.14065992521341	61	basse	58.14065992521341	0
232	vide	94.143653722414	62	basse	94.143653722414	0
233	vide	110.65956294616177	63	basse	110.65956294616177	0
234	vide	249.01519548245935	77	alignement	249.01519548245935	0
235	vide	65.59376763917268	85	alignement	65.59376763917268	0
236	vide	174.12924081247604	92	alignement	174.12924081247604	0
237	vide	40.62234262522854	104	basse	40.62234262522854	0
238	vide	92.35912770890225	105	alignement	92.35912770890225	0
239	vide	50.81844122809585	106	alignement	50.81844122809585	0
240	vide	81.08535445874084	107	alignement	81.08535445874084	0
241	vide	22.315111191649574	112	alignement	22.315111191649574	0
242	vide	54.3213741715815	115	alignement	54.3213741715815	0
243	vide	148.83657322053452	122	ponctuee	148.83657322053452	0
244	vide	187.076975538231	127	basse	187.076975538231	0
245	vide	66.80674326720295	128	ponctuee	66.80674326720295	0
246	vide	281.8168699362157	145	basse	281.8168699362157	0
247	vide	24.71277771196634	155	alignement	24.71277771196634	0
248	vide	40.66481334867119	163	basse	40.66481334867119	0
249	vide	37.95124317843247	165	basse	37.95124317843247	0
250	vide	37.99956728243562	166	alignement	37.99956728243562	0
251	vide	37.13144480091443	169	alignement	37.13144480091443	0
252	vide	82.83503613895134	170	basse	82.83503613895134	0
253	vide	63.81561881551656	173	haute	63.81561881551656	0
254	vide	45.0652803485629	175	ponctuee	45.0652803485629	0
255	vide	128.0734308237517	177	basse	128.0734308237517	0
256	vide	63.51132759819052	181	ponctuee	63.51132759819052	0
257	vide	20.96328535659522	188	basse	20.96328535659522	0
258	vide	33.69278129977544	195	haute	33.69278129977544	0
259	vide	49.63627911706136	198	basse	49.63627911706136	0
260	vide	30.10128041720922	201	ponctuee	30.10128041720922	0
261	vide	32.46966242369094	202	ponctuee	32.46966242369094	0
262	vide	38.16702858552757	203	ponctuee	38.16702858552757	0
263	vide	56.89485556593378	204	basse	56.89485556593378	0

## Sheet: Rural.2000_2019
fid	Type_haie	Longueur	join_fid	join_Type_	join_Longu	distance
1	ponctuee	204.7327657992108	1	haute	232.98802944707467	0
2	ponctuee	598.6787658980277	3	ponctuee	607.0028165985584	0
3	alignement	61.55079902475661	4	ponctuee	63.01868100719713	0.081726507122037
4	alignement	55.818208606528984	0	vide	55.818208606528984	10.001924373468352
5	ponctuee	59.2526139399201	0	vide	59.2526139399201	2.418287584721738
6	basse	62.22226710573968	0	vide	62.22226710573968	5.416785000759984
7	ponctuee	109.32228742473612	2	ponctuee	230.92070034134017	0
8	haute	47.29588039724795	5	haute	34.23874532237083	0
9	ponctuee	67.50551322584629	0	vide	67.50551322584629	93.53776384049934
10	basse	75.64165629949501	16	basse	23.488357271542323	0.977616972027477
11	basse	29.333164980690714	6	ponctuee	26.439655526446042	2.007437326963466
12	basse	96.00033636491082	202	ponctuee	71.12296324331001	0.966322415926166
13	haute	143.49895462106926	7	haute	205.8103973221279	0
14	haute	84.8923581248387	220	basse	64.8347046499983	0.367318430796761
15	haute	93.67359573469932	13	haute	111.43892900482263	2.346987807943917
16	ponctuee	29.618366125899936	15	ponctuee	31.876386014329483	1.406986956402185
17	basse	117.7198212501395	9	basse	98.55429910583688	0
18	ponctuee	75.42843886688057	10	ponctuee	76.8957669909615	0
19	alignement	58.39406641064486	0	vide	58.39406641064486	14.549949756938389
20	haute	49.80444488146727	11	haute	55.33296567226965	0.816054779723727
21	haute	43.31409513513755	12	haute	50.170024032067445	0
22	haute	102.36588447490838	14	haute	102.2178792869709	0
23	basse	82.09747994298118	19	basse	72.0313046072778	1.360702363433866
24	ponctuee	201.56174023358957	20	ponctuee	206.4196308436657	0
25	ponctuee	226.74716463753376	181	ponctuee	225.57282721121916	0
26	basse	63.58596596849684	203	basse	49.40330938692977	1.227631241777955
27	ponctuee	42.220884723494756	221	ponctuee	41.30357831048426	0
28	alignement	134.92964146886476	26	alignement	139.90916595018487	0
29	alignement	157.89247864743004	25	alignement	164.41305156693824	0
30	haute	205.77942360058267	24	haute	205.41155657266057	0
31	ponctuee	155.08631358668742	23	ponctuee	121.71911100565421	0
32	haute	128.12001884175405	22	haute	133.15689249774056	0
33	haute	111.8281213414424	21	haute	102.90670884279706	0
34	ponctuee	85.40548435853292	0	vide	85.40548435853292	5.830609508190528
35	ponctuee	44.6260637095631	94	ponctuee	48.91885647307252	0.812018182309053
36	ponctuee	110.65828879679881	27	basse	25.334256093012012	2.787284366451473
37	alignement	48.30227156311951	134	alignement	49.85303651292359	1.192010199013107
38	basse	39.90818593419291	92	ponctuee	58.63570088067816	0
39	alignement	104.63566272628174	108	alignement	107.95752133483693	0.210161042652316
40	alignement	101.94072403033529	109	alignement	102.38327999252307	1.123809640083979
41	basse	132.07542754659494	31	ponctuee	31.26596121245449	0.38534168009286
42	ponctuee	95.90548614119078	28	ponctuee	84.62159628048246	0.999479331610069
43	alignement	41.07038299305471	36	alignement	41.837899448722766	0.623487836048857
44	alignement	318.9061853761781	37	alignement	229.17663807785087	0
45	ponctuee	123.30734474467314	127	ponctuee	82.44633994929474	0
46	alignement	33.64556372289377	40	alignement	34.01047289471183	3.155494168316084
47	alignement	27.998619658764166	41	alignement	22.137192260893904	2.087220369974353
48	alignement	24.911843271403058	34	alignement	24.46802060723129	0.146967411311499
49	basse	106.36877568117622	33	basse	115.45471929204749	0
50	basse	93.17189115390265	32	haute	82.86389429852842	0
51	ponctuee	57.39118594842656	150	basse	25.603032792763294	1.834494872819893
52	basse	13.805993796459399	163	basse	19.733839198115245	0.366366449670437
53	alignement	53.24843347377134	129	alignement	54.7721457234549	2.279505274543216
54	alignement	47.57596284923447	91	alignement	55.39542156708102	0.642961638367425
55	ponctuee	81.69059045033822	107	basse	86.9211641484737	0
56	haute	44.573350777609704	116	haute	40.63521120312636	0
57	haute	123.13074924710466	117	haute	50.88178813618191	0.632156150368525
58	alignement	49.919572959747384	88	alignement	51.394140556188965	0
59	alignement	41.582712974618325	89	alignement	60.036426142127944	1.119703408780931
60	ponctuee	47.825841891335585	87	haute	51.05298879335544	0
61	basse	58.14065992521341	113	haute	60.61033082506629	0.684520313332534
62	basse	94.143653722414	206	haute	98.16470738412346	0
63	basse	110.65956294616177	115	haute	117.26280751450237	0
64	haute	160.38102591529162	85	haute	160.2865225216055	0
65	ponctuee	70.83049868487515	82	haute	75.76318981443231	0.742063225203213
66	basse	75.40926712607076	84	ponctuee	43.82121884089176	1.159163962717335
67	ponctuee	47.311080875017744	216	ponctuee	51.829690874310536	0.735416481798
68	ponctuee	92.76574031957122	225	ponctuee	45.9320192778788	14.303951917252503
69	haute	211.68786142014437	103	haute	213.52027655858066	0.088650071344437
70	haute	27.60950157218908	102	haute	24.316985020097235	0.640366482138061
71	basse	17.669435719141923	101	basse	26.802936089329705	0.850636788854767
72	haute	148.32056546447598	100	haute	146.7449321674452	0
73	ponctuee	73.49892363270101	106	ponctuee	67.0581709478223	0
74	haute	76.91599700583859	105	haute	86.20455274140656	0
75	haute	73.80244905412722	183	haute	70.22342885773759	0.647328252519442
76	alignement	317.10176271857125	64	alignement	322.9659154251328	0
77	alignement	249.01519548245935	65	alignement	245.42200003028188	0
78	alignement	209.5908952831549	66	alignement	200.26607520412858	0.74578126302689
79	alignement	41.62223634243763	68	alignement	39.7048812764776	0.306664440190224
80	ponctuee	127.95816241242412	73	ponctuee	132.40765700165642	0
81	alignement	152.0693622496316	70	alignement	79.83364406411306	0
82	alignement	54.589400565742125	71	alignement	53.98333445762624	0
83	alignement	68.66535651342204	74	alignement	67.60548150521312	0
84	ponctuee	111.97811069249374	75	haute	121.43546366719688	0.88571455128566
85	alignement	65.59376763917268	188	alignement	60.839237869711496	0
86	alignement	105.50265055561242	79	alignement	110.15650554697895	0.950698578630475
87	alignement	61.88902581435739	78	alignement	64.0518193832238	0
88	ponctuee	114.43243577648815	69	ponctuee	109.58905811424694	0.253644071090428
89	basse	72.02811761138183	0	vide	72.02811761138183	126.62963656950718
90	basse	45.09243147750524	59	haute	57.49372071805702	2.314993186587727
91	haute	44.752376668029825	204	haute	46.13229852119332	1.19642102960012
92	alignement	174.12924081247604	58	alignement	129.71145112235178	0
93	haute	173.5378700016836	29	haute	165.97855137394924	0
94	haute	70.75251222776974	51	haute	84.43029198395121	0
95	ponctuee	94.2461744044063	53	ponctuee	93.07915431786759	0.813475160108956
96	ponctuee	195.65504424871511	223	basse	67.94670906959541	0.151314738796886
97	ponctuee	61.28828752416376	205	basse	20.225355243300587	0.211412386367043
98	ponctuee	56.467774792633406	52	ponctuee	59.56743593538399	0.553620551582378
99	alignement	53.98209870121402	54	alignement	55.89447921053314	0
100	haute	68.1001308895474	0	vide	68.1001308895474	10.903563801410334
101	haute	120.79630323095137	63	haute	116.83480881799989	0
102	haute	95.24944411837271	111	haute	95.70443872620865	1.611014102068046
103	alignement	133.30605332433333	55	alignement	136.57709058925872	1.407700411682742
104	basse	40.62234262522854	56	haute	42.35064469468763	0.831445761898263
105	alignement	92.35912770890225	189	alignement	94.70918583590685	0
106	alignement	50.81844122809585	208	alignement	54.69715423593188	0.163403287293097
107	alignement	81.08535445874084	97	alignement	48.7088453324346	1.638212502657401
108	alignement	47.010394343416344	0	vide	47.010394343416344	20.599499231661294
109	basse	133.38430865692058	47	ponctuee	120.68163835897573	0.292880257308047
110	basse	20.3399958970558	49	haute	22.042076104358365	0
111	haute	115.30808184103805	45	haute	59.944939554268004	1.845279484866655
112	alignement	22.315111191649574	38	alignement	35.13805106711285	5.147534755395555
113	alignement	59.00626581270116	131	alignement	261.5203699403527	1.798360379448062
114	ponctuee	273.80259264967054	118	ponctuee	269.2807354337333	0
115	alignement	54.3213741715815	224	haute	67.40398991431324	0
116	haute	515.8243959074393	119	haute	529.7110311790335	0
117	ponctuee	47.7335996348037	186	haute	56.72035608413517	0.356946536574991
118	alignement	60.09636643602273	124	alignement	58.98778542493264	1.963042628560346
119	alignement	276.92139902539634	147	alignement	275.4852428856877	0.320890881652319
120	basse	57.48743352925467	151	haute	69.20948230233289	0
121	basse	31.343749225597513	152	ponctuee	31.091424670218142	0
122	ponctuee	148.83657322053452	168	haute	127.26669003606067	1.253267597037916
123	haute	97.49971766755179	201	haute	91.20413110292547	0.24407076505721
124	basse	79.93817535609516	155	ponctuee	59.26744809607611	0.798261272659121
125	basse	20.342048313261117	120	haute	50.26855941375826	0
126	basse	18.293716658043028	148	ponctuee	95.44678456470187	1.384832001808324
127	basse	187.076975538231	226	ponctuee	25.946942466510134	2.197671616179903
128	ponctuee	66.80674326720295	0	vide	66.80674326720295	33.4850524176022
129	basse	64.50122063550921	210	ponctuee	100.17462056733953	0
130	basse	65.47295775602927	209	ponctuee	107.95430936339646	0
131	ponctuee	130.93555359633544	156	ponctuee	152.35742360581352	0.257697254526753
132	ponctuee	44.48280116644975	157	ponctuee	47.34112064658911	1.495813051551471
133	alignement	28.42624575635414	146	alignement	31.367009615930527	5.472771085688642
134	alignement	78.38029146732077	144	alignement	81.95192915950948	2.025687559701151
135	alignement	42.836129462032964	145	alignement	44.18066848269996	2.022697476046705
136	alignement	528.0458693677692	135	alignement	536.7511787513582	0
137	alignement	278.3745894310711	136	alignement	282.74896367778257	1.118634612552981
138	alignement	184.8825810024138	137	alignement	163.22313969527718	0.210808706725815
139	alignement	29.51611446569794	133	alignement	28.20793609478908	3.823138134000483
140	alignement	235.70357510167662	132	alignement	236.8302518325955	3.705324905441754
141	alignement	197.1365190155204	143	alignement	198.40710023553396	0
142	alignement	114.76726598664105	142	alignement	77.17480143658587	0.644163798160366
143	alignement	15.14964221368641	195	alignement	16.741432408605807	3.373863315063965
144	basse	229.55325223544583	138	haute	251.15833781523577	0
145	basse	281.8168699362157	139	basse	294.4262147427072	0.46422076259882
146	haute	73.2435801283444	158	haute	66.88971230519331	0.541431682448659
147	haute	257.5952628855374	159	haute	251.2342591806477	0
148	basse	87.0555000734502	0	vide	87.0555000734502	27.079100682652694
149	basse	41.26511024950685	160	ponctuee	33.15780890752426	0.543117183504143
150	alignement	61.66006627268044	193	alignement	64.26891751974384	1.479052682459828
151	alignement	17.345680685800673	192	alignement	21.050739785875113	0.623340578205348
152	alignement	30.152796177256324	191	alignement	21.960256681917937	0.624754096001969
153	basse	221.19968887850487	141	haute	222.79451306932467	0
154	basse	66.57829148863514	140	haute	67.69654270823777	0
155	alignement	24.71277771196634	194	alignement	24.04166748791431	1.36029731496372
156	basse	139.38926889858743	0	vide	139.38926889858743	8.073286126291782
157	basse	132.77499537974342	161	ponctuee	147.4711241147596	0
158	ponctuee	139.5124776948192	211	ponctuee	155.68363113390149	0.255426956565972
159	ponctuee	93.66360064471853	165	ponctuee	89.3154519360711	0
160	ponctuee	63.73621970350695	164	ponctuee	62.57769718563669	0.253823547111806
161	basse	98.37853343092115	166	ponctuee	86.98246033678586	2.003375188745446
162	basse	141.77602730115473	162	ponctuee	140.92376993760917	0
163	basse	40.66481334867119	227	basse	32.69553835274968	3.186333105478894
164	haute	20.08987915246224	177	haute	23.508639410698034	0.374086145849251
165	basse	37.95124317843247	77	basse	59.42433531428901	0.631891971243579
166	alignement	37.99956728243562	0	vide	37.99956728243562	5.001884460714269
167	alignement	56.87095871108338	0	vide	56.87095871108338	65.57243212228147
168	ponctuee	116.21365918575187	167	ponctuee	105.9688630490796	0.403739013509248
169	alignement	37.13144480091443	198	alignement	33.819171279328614	1.340698265688378
170	basse	82.83503613895134	170	ponctuee	62.278398108020085	0.847059955414676
171	ponctuee	35.91168169461341	0	vide	35.91168169461341	55.94795402511721
172	basse	64.70026093282013	185	basse	35.00131705294242	0.639010672356529
173	haute	63.81561881551656	0	vide	63.81561881551656	39.20363535339879
174	ponctuee	75.07182600074177	187	haute	32.90292136641828	0
175	ponctuee	45.0652803485629	0	vide	45.0652803485629	6.584055995961429
176	alignement	38.46236970122908	199	ponctuee	49.13050927820111	0
177	basse	128.0734308237517	0	vide	128.0734308237517	5.170223346489925
178	haute	59.35288712647794	0	vide	59.35288712647794	36.0088360663941
179	haute	91.32531093857558	0	vide	91.32531093857558	2.155314437992804
180	haute	59.54506366662402	126	haute	60.6745691600174	2.724100934413205
181	ponctuee	63.51132759819052	44	ponctuee	70.64281031709862	0
182	basse	95.63674866370562	228	basse	108.89097055973586	95.68847292180448
183	haute	22.522942688557247	200	haute	22.232380669266938	0
184	ponctuee	156.4871519002838	90	ponctuee	155.45782717025983	0.56816630807661
185	haute	43.9931416189892	184	ponctuee	34.04679349082255	0.061571139207151
186	ponctuee	40.84934732200831	182	basse	49.228318144330935	0.149034786372532
187	haute	87.41586943717478	112	haute	98.96522935614855	0.441884209329966
188	basse	20.96328535659522	153	ponctuee	52.11414136012226	0
189	haute	51.51973243446558	212	haute	53.95216843252032	0
190	ponctuee	58.46916420400249	213	ponctuee	54.12040221235122	0
191	ponctuee	61.67647024239132	214	ponctuee	89.6740968387113	0.933428045010343
192	haute	300.89363407116804	215	haute	303.4739810558836	1.225555766443111
193	haute	29.141902503431734	229	ponctuee	32.10085473352147	1.988117895075644
194	haute	42.46836657212856	0	vide	42.46836657212856	3.033252671302724
195	haute	33.69278129977544	218	haute	28.71393861049701	0
196	haute	59.283067734090096	219	haute	97.37220271559865	1.754183117631183
197	basse	10.677592683270735	178	haute	10.676182801626956	0
198	basse	49.63627911706136	0	vide	49.63627911706136	87.97046934494942
199	ponctuee	21.63072558465706	149	ponctuee	97.11761457077195	0
200	alignement	45.92953339716831	114	alignement	48.810247438525735	0
201	ponctuee	30.10128041720922	57	haute	94.99316767615882	0
202	ponctuee	32.46966242369094	125	ponctuee	29.894243051640128	0
203	ponctuee	38.16702858552757	171	ponctuee	35.192398274880524	0
204	basse	56.89485556593378	172	basse	49.396188343617006	0
205	basse	122.0739611551073	230	ponctuee	97.72415556711711	0
206	haute	35.0721848758479	0	vide	35.0721848758479	0
207	vide	74.0673635074674	8	basse	74.0673635074674	0
208	vide	42.508658839600216	17	basse	42.508658839600216	0
209	vide	28.7813836296188	18	basse	28.7813836296188	0
210	vide	81.06683413498152	30	basse	81.06683413498152	0
211	vide	17.213866809841097	35	alignement	17.213866809841097	0
212	vide	48.11559158304953	39	basse	48.11559158304953	0
213	vide	106.93113549039656	42	ponctuee	106.93113549039656	0
214	vide	163.62981962983386	43	ponctuee	163.62981962983386	0
215	vide	104.3251679555848	46	ponctuee	104.3251679555848	0
216	vide	111.12775191633695	48	alignement	111.12775191633695	0
217	vide	36.17625940457282	50	alignement	36.17625940457282	0
218	vide	38.20606854126027	60	basse	38.20606854126027	0
219	vide	10.313950459821887	61	basse	10.313950459821887	0
220	vide	40.885622982045575	62	basse	40.885622982045575	0
221	vide	125.11461497357875	67	haute	125.11461497357875	0
222	vide	31.26153276335242	72	alignement	31.26153276335242	0
223	vide	21.168678144493533	76	basse	21.168678144493533	0
224	vide	74.35318623425351	80	alignement	74.35318623425351	0
225	vide	90.44958307000324	81	alignement	90.44958307000324	0
226	vide	52.076576844868136	83	alignement	52.076576844868136	0
227	vide	87.94763687826728	86	ponctuee	87.94763687826728	0
228	vide	53.161740468712686	93	basse	53.161740468712686	0
229	vide	57.88135877661228	95	basse	57.88135877661228	0
230	vide	87.81142342308699	96	basse	87.81142342308699	0
231	vide	104.70621888771807	98	basse	104.70621888771807	0
232	vide	104.87359684038506	99	basse	104.87359684038506	0
233	vide	30.21639229193589	104	ponctuee	30.21639229193589	0
234	vide	33.381930841869924	110	basse	33.381930841869924	0
235	vide	27.963243327513155	121	ponctuee	27.963243327513155	0
236	vide	59.34003270734243	122	basse	59.34003270734243	0
237	vide	180.2972202678017	123	alignement	180.2972202678017	0
238	vide	62.55240896425426	128	ponctuee	62.55240896425426	0
239	vide	40.96221639716545	130	basse	40.96221639716545	0
240	vide	23.340488046456105	154	haute	23.340488046456105	0
241	vide	86.07697513520077	169	ponctuee	86.07697513520077	0
242	vide	52.65778129375592	173	basse	52.65778129375592	0
243	vide	142.07929626582916	174	basse	142.07929626582916	0
244	vide	40.61009211794745	175	ponctuee	40.61009211794745	0
245	vide	95.10280239680125	176	ponctuee	95.10280239680125	0
246	vide	64.4771310301039	179	basse	64.4771310301039	0
247	vide	24.32930342947556	180	alignement	24.32930342947556	0
248	vide	75.59079684629387	190	basse	75.59079684629387	0
249	vide	26.56037529918777	196	ponctuee	26.56037529918777	0
250	vide	33.43472221625411	197	basse	33.43472221625411	0
251	vide	69.33727143504066	207	basse	69.33727143504066	0
252	vide	30.3132738998991	217	ponctuee	30.3132738998991	0
253	vide	50.82829148520764	222	alignement	50.82829148520764	0

## Sheet: Rural.2000-2019
fid	Type_haie	Longueur	join_fid	join_Type_	join_Longu	distance
1	ponctuee	204.7327657992108	1	haute	232.98802944707467	0
2	ponctuee	598.6787658980277	3	ponctuee	607.0028165985584	0
3	alignement	61.55079902475661	4	ponctuee	63.01868100719713	0.081726507122037
4	alignement	55.818208606528984	0	vide	55.818208606528984	10.001924373468352
5	ponctuee	59.2526139399201	0	vide	59.2526139399201	2.418287584721738
6	basse	62.22226710573968	0	vide	62.22226710573968	5.416785000759984
7	ponctuee	109.32228742473612	2	ponctuee	230.92070034134017	0
8	haute	47.29588039724795	5	haute	34.23874532237083	0
9	ponctuee	67.50551322584629	0	vide	67.50551322584629	93.53776384049934
10	basse	75.64165629949501	16	basse	23.488357271542323	0.977616972027477
11	basse	29.333164980690714	6	ponctuee	26.439655526446042	2.007437326963466
12	basse	96.00033636491082	202	ponctuee	71.12296324331001	0.966322415926166
13	haute	143.49895462106926	7	haute	205.8103973221279	0
14	haute	84.8923581248387	220	basse	64.8347046499983	0.367318430796761
15	haute	93.67359573469932	13	haute	111.43892900482263	2.346987807943917
16	ponctuee	29.618366125899936	15	ponctuee	31.876386014329483	1.406986956402185
17	basse	117.7198212501395	9	basse	98.55429910583688	0
18	ponctuee	75.42843886688057	10	ponctuee	76.8957669909615	0
19	alignement	58.39406641064486	0	vide	58.39406641064486	14.549949756938389
20	haute	49.80444488146727	11	haute	55.33296567226965	0.816054779723727
21	haute	43.31409513513755	12	haute	50.170024032067445	0
22	haute	102.36588447490838	14	haute	102.2178792869709	0
23	basse	82.09747994298118	19	basse	72.0313046072778	1.360702363433866
24	ponctuee	201.56174023358957	20	ponctuee	206.4196308436657	0
25	ponctuee	226.74716463753376	181	ponctuee	225.57282721121916	0
26	basse	63.58596596849684	203	basse	49.40330938692977	1.227631241777955
27	ponctuee	42.220884723494756	221	ponctuee	41.30357831048426	0
28	alignement	134.92964146886476	26	alignement	139.90916595018487	0
29	alignement	157.89247864743004	25	alignement	164.41305156693824	0
30	haute	205.77942360058267	24	haute	205.41155657266057	0
31	ponctuee	155.08631358668742	23	ponctuee	121.71911100565421	0
32	haute	128.12001884175405	22	haute	133.15689249774056	0
33	haute	111.8281213414424	21	haute	102.90670884279706	0
34	ponctuee	85.40548435853292	0	vide	85.40548435853292	5.830609508190528
35	ponctuee	44.6260637095631	94	ponctuee	48.91885647307252	0.812018182309053
36	ponctuee	110.65828879679881	27	basse	25.334256093012012	2.787284366451473
37	alignement	48.30227156311951	134	alignement	49.85303651292359	1.192010199013107
38	basse	39.90818593419291	92	ponctuee	58.63570088067816	0
39	alignement	104.63566272628174	108	alignement	107.95752133483693	0.210161042652316
40	alignement	101.94072403033529	109	alignement	102.38327999252307	1.123809640083979
41	basse	132.07542754659494	31	ponctuee	31.26596121245449	0.38534168009286
42	ponctuee	95.90548614119078	28	ponctuee	84.62159628048246	0.999479331610069
43	alignement	41.07038299305471	36	alignement	41.837899448722766	0.623487836048857
44	alignement	318.9061853761781	37	alignement	229.17663807785087	0
45	ponctuee	123.30734474467314	127	ponctuee	82.44633994929474	0
46	alignement	33.64556372289377	40	alignement	34.01047289471183	3.155494168316084
47	alignement	27.998619658764166	41	alignement	22.137192260893904	2.087220369974353
48	alignement	24.911843271403058	34	alignement	24.46802060723129	0.146967411311499
49	basse	106.36877568117622	33	basse	115.45471929204749	0
50	basse	93.17189115390265	32	haute	82.86389429852842	0
51	ponctuee	57.39118594842656	150	basse	25.603032792763294	1.834494872819893
52	basse	13.805993796459399	163	basse	19.733839198115245	0.366366449670437
53	alignement	53.24843347377134	129	alignement	54.7721457234549	2.279505274543216
54	alignement	47.57596284923447	91	alignement	55.39542156708102	0.642961638367425
55	ponctuee	81.69059045033822	107	basse	86.9211641484737	0
56	haute	44.573350777609704	116	haute	40.63521120312636	0
57	haute	123.13074924710466	117	haute	50.88178813618191	0.632156150368525
58	alignement	49.919572959747384	88	alignement	51.394140556188965	0
59	alignement	41.582712974618325	89	alignement	60.036426142127944	1.119703408780931
60	ponctuee	47.825841891335585	87	haute	51.05298879335544	0
61	basse	58.14065992521341	113	haute	60.61033082506629	0.684520313332534
62	basse	94.143653722414	206	haute	98.16470738412346	0
63	basse	110.65956294616177	115	haute	117.26280751450237	0
64	haute	160.38102591529162	85	haute	160.2865225216055	0
65	ponctuee	70.83049868487515	82	haute	75.76318981443231	0.742063225203213
66	basse	75.40926712607076	84	ponctuee	43.82121884089176	1.159163962717335
67	ponctuee	47.311080875017744	216	ponctuee	51.829690874310536	0.735416481798
68	ponctuee	92.76574031957122	225	ponctuee	45.9320192778788	14.303951917252503
69	haute	211.68786142014437	103	haute	213.52027655858066	0.088650071344437
70	haute	27.60950157218908	102	haute	24.316985020097235	0.640366482138061
71	basse	17.669435719141923	101	basse	26.802936089329705	0.850636788854767
72	haute	148.32056546447598	100	haute	146.7449321674452	0
73	ponctuee	73.49892363270101	106	ponctuee	67.0581709478223	0
74	haute	76.91599700583859	105	haute	86.20455274140656	0
75	haute	73.80244905412722	183	haute	70.22342885773759	0.647328252519442
76	alignement	317.10176271857125	64	alignement	322.9659154251328	0
77	alignement	249.01519548245935	65	alignement	245.42200003028188	0
78	alignement	209.5908952831549	66	alignement	200.26607520412858	0.74578126302689
79	alignement	41.62223634243763	68	alignement	39.7048812764776	0.306664440190224
80	ponctuee	127.95816241242412	73	ponctuee	132.40765700165642	0
81	alignement	152.0693622496316	70	alignement	79.83364406411306	0
82	alignement	54.589400565742125	71	alignement	53.98333445762624	0
83	alignement	68.66535651342204	74	alignement	67.60548150521312	0
84	ponctuee	111.97811069249374	75	haute	121.43546366719688	0.88571455128566
85	alignement	65.59376763917268	188	alignement	60.839237869711496	0
86	alignement	105.50265055561242	79	alignement	110.15650554697895	0.950698578630475
87	alignement	61.88902581435739	78	alignement	64.0518193832238	0
88	ponctuee	114.43243577648815	69	ponctuee	109.58905811424694	0.253644071090428
89	basse	72.02811761138183	0	vide	72.02811761138183	126.62963656950718
90	basse	45.09243147750524	59	haute	57.49372071805702	2.314993186587727
91	haute	44.752376668029825	204	haute	46.13229852119332	1.19642102960012
92	alignement	174.12924081247604	58	alignement	129.71145112235178	0
93	haute	173.5378700016836	29	haute	165.97855137394924	0
94	haute	70.75251222776974	51	haute	84.43029198395121	0
95	ponctuee	94.2461744044063	53	ponctuee	93.07915431786759	0.813475160108956
96	ponctuee	195.65504424871511	223	basse	67.94670906959541	0.151314738796886
97	ponctuee	61.28828752416376	205	basse	20.225355243300587	0.211412386367043
98	ponctuee	56.467774792633406	52	ponctuee	59.56743593538399	0.553620551582378
99	alignement	53.98209870121402	54	alignement	55.89447921053314	0
100	haute	68.1001308895474	0	vide	68.1001308895474	10.903563801410334
101	haute	120.79630323095137	63	haute	116.83480881799989	0
102	haute	95.24944411837271	111	haute	95.70443872620865	1.611014102068046
103	alignement	133.30605332433333	55	alignement	136.57709058925872	1.407700411682742
104	basse	40.62234262522854	56	haute	42.35064469468763	0.831445761898263
105	alignement	92.35912770890225	189	alignement	94.70918583590685	0
106	alignement	50.81844122809585	208	alignement	54.69715423593188	0.163403287293097
107	alignement	81.08535445874084	97	alignement	48.7088453324346	1.638212502657401
108	alignement	47.010394343416344	0	vide	47.010394343416344	20.599499231661294
109	basse	133.38430865692058	47	ponctuee	120.68163835897573	0.292880257308047
110	basse	20.3399958970558	49	haute	22.042076104358365	0
111	haute	115.30808184103805	45	haute	59.944939554268004	1.845279484866655
112	alignement	22.315111191649574	38	alignement	35.13805106711285	5.147534755395555
113	alignement	59.00626581270116	131	alignement	261.5203699403527	1.798360379448062
114	ponctuee	273.80259264967054	118	ponctuee	269.2807354337333	0
115	alignement	54.3213741715815	224	haute	67.40398991431324	0
116	haute	515.8243959074393	119	haute	529.7110311790335	0
117	ponctuee	47.7335996348037	186	haute	56.72035608413517	0.356946536574991
118	alignement	60.09636643602273	124	alignement	58.98778542493264	1.963042628560346
119	alignement	276.92139902539634	147	alignement	275.4852428856877	0.320890881652319
120	basse	57.48743352925467	151	haute	69.20948230233289	0
121	basse	31.343749225597513	152	ponctuee	31.091424670218142	0
122	ponctuee	148.83657322053452	168	haute	127.26669003606067	1.253267597037916
123	haute	97.49971766755179	201	haute	91.20413110292547	0.24407076505721
124	basse	79.93817535609516	155	ponctuee	59.26744809607611	0.798261272659121
125	basse	20.342048313261117	120	haute	50.26855941375826	0
126	basse	18.293716658043028	148	ponctuee	95.44678456470187	1.384832001808324
127	basse	187.076975538231	226	ponctuee	25.946942466510134	2.197671616179903
128	ponctuee	66.80674326720295	0	vide	66.80674326720295	33.4850524176022
129	basse	64.50122063550921	210	ponctuee	100.17462056733953	0
130	basse	65.47295775602927	209	ponctuee	107.95430936339646	0
131	ponctuee	130.93555359633544	156	ponctuee	152.35742360581352	0.257697254526753
132	ponctuee	44.48280116644975	157	ponctuee	47.34112064658911	1.495813051551471
133	alignement	28.42624575635414	146	alignement	31.367009615930527	5.472771085688642
134	alignement	78.38029146732077	144	alignement	81.95192915950948	2.025687559701151
135	alignement	42.836129462032964	145	alignement	44.18066848269996	2.022697476046705
136	alignement	528.0458693677692	135	alignement	536.7511787513582	0
137	alignement	278.3745894310711	136	alignement	282.74896367778257	1.118634612552981
138	alignement	184.8825810024138	137	alignement	163.22313969527718	0.210808706725815
139	alignement	29.51611446569794	133	alignement	28.20793609478908	3.823138134000483
140	alignement	235.70357510167662	132	alignement	236.8302518325955	3.705324905441754
141	alignement	197.1365190155204	143	alignement	198.40710023553396	0
142	alignement	114.76726598664105	142	alignement	77.17480143658587	0.644163798160366
143	alignement	15.14964221368641	195	alignement	16.741432408605807	3.373863315063965
144	basse	229.55325223544583	138	haute	251.15833781523577	0
145	basse	281.8168699362157	139	basse	294.4262147427072	0.46422076259882
146	haute	73.2435801283444	158	haute	66.88971230519331	0.541431682448659
147	haute	257.5952628855374	159	haute	251.2342591806477	0
148	basse	87.0555000734502	0	vide	87.0555000734502	27.079100682652694
149	basse	41.26511024950685	160	ponctuee	33.15780890752426	0.543117183504143
150	alignement	61.66006627268044	193	alignement	64.26891751974384	1.479052682459828
151	alignement	17.345680685800673	192	alignement	21.050739785875113	0.623340578205348
152	alignement	30.152796177256324	191	alignement	21.960256681917937	0.624754096001969
153	basse	221.19968887850487	141	haute	222.79451306932467	0
154	basse	66.57829148863514	140	haute	67.69654270823777	0
155	alignement	24.71277771196634	194	alignement	24.04166748791431	1.36029731496372
156	basse	139.38926889858743	0	vide	139.38926889858743	8.073286126291782
157	basse	132.77499537974342	161	ponctuee	147.4711241147596	0
158	ponctuee	139.5124776948192	211	ponctuee	155.68363113390149	0.255426956565972
159	ponctuee	93.66360064471853	165	ponctuee	89.3154519360711	0
160	ponctuee	63.73621970350695	164	ponctuee	62.57769718563669	0.253823547111806
161	basse	98.37853343092115	166	ponctuee	86.98246033678586	2.003375188745446
162	basse	141.77602730115473	162	ponctuee	140.92376993760917	0
163	basse	40.66481334867119	227	basse	32.69553835274968	3.186333105478894
164	haute	20.08987915246224	177	haute	23.508639410698034	0.374086145849251
165	basse	37.95124317843247	77	basse	59.42433531428901	0.631891971243579
166	alignement	37.99956728243562	0	vide	37.99956728243562	5.001884460714269
167	alignement	56.87095871108338	0	vide	56.87095871108338	65.57243212228147
168	ponctuee	116.21365918575187	167	ponctuee	105.9688630490796	0.403739013509248
169	alignement	37.13144480091443	198	alignement	33.819171279328614	1.340698265688378
170	basse	82.83503613895134	170	ponctuee	62.278398108020085	0.847059955414676
171	ponctuee	35.91168169461341	0	vide	35.91168169461341	55.94795402511721
172	basse	64.70026093282013	185	basse	35.00131705294242	0.639010672356529
173	haute	63.81561881551656	0	vide	63.81561881551656	39.20363535339879
174	ponctuee	75.07182600074177	187	haute	32.90292136641828	0
175	ponctuee	45.0652803485629	0	vide	45.0652803485629	6.584055995961429
176	alignement	38.46236970122908	199	ponctuee	49.13050927820111	0
177	basse	128.0734308237517	0	vide	128.0734308237517	5.170223346489925
178	haute	59.35288712647794	0	vide	59.35288712647794	36.0088360663941
179	haute	91.32531093857558	0	vide	91.32531093857558	2.155314437992804
180	haute	59.54506366662402	126	haute	60.6745691600174	2.724100934413205
181	ponctuee	63.51132759819052	44	ponctuee	70.64281031709862	0
182	basse	95.63674866370562	228	basse	108.89097055973586	95.68847292180448
183	haute	22.522942688557247	200	haute	22.232380669266938	0
184	ponctuee	156.4871519002838	90	ponctuee	155.45782717025983	0.56816630807661
185	haute	43.9931416189892	184	ponctuee	34.04679349082255	0.061571139207151
186	ponctuee	40.84934732200831	182	basse	49.228318144330935	0.149034786372532
187	haute	87.41586943717478	112	haute	98.96522935614855	0.441884209329966
188	basse	20.96328535659522	153	ponctuee	52.11414136012226	0
189	haute	51.51973243446558	212	haute	53.95216843252032	0
190	ponctuee	58.46916420400249	213	ponctuee	54.12040221235122	0
191	ponctuee	61.67647024239132	214	ponctuee	89.6740968387113	0.933428045010343
192	haute	300.89363407116804	215	haute	303.4739810558836	1.225555766443111
193	haute	29.141902503431734	229	ponctuee	32.10085473352147	1.988117895075644
194	haute	42.46836657212856	0	vide	42.46836657212856	3.033252671302724
195	haute	33.69278129977544	218	haute	28.71393861049701	0
196	haute	59.283067734090096	219	haute	97.37220271559865	1.754183117631183
197	basse	10.677592683270735	178	haute	10.676182801626956	0
198	basse	49.63627911706136	0	vide	49.63627911706136	87.97046934494942
199	ponctuee	21.63072558465706	149	ponctuee	97.11761457077195	0
200	alignement	45.92953339716831	114	alignement	48.810247438525735	0
201	ponctuee	30.10128041720922	57	haute	94.99316767615882	0
202	ponctuee	32.46966242369094	125	ponctuee	29.894243051640128	0
203	ponctuee	38.16702858552757	171	ponctuee	35.192398274880524	0
204	basse	56.89485556593378	172	basse	49.396188343617006	0
205	basse	122.0739611551073	230	ponctuee	97.72415556711711	0
206	haute	35.0721848758479	0	vide	35.0721848758479	0
207	vide	74.0673635074674	8	basse	74.0673635074674	0
208	vide	42.508658839600216	17	basse	42.508658839600216	0
209	vide	28.7813836296188	18	basse	28.7813836296188	0
210	vide	81.06683413498152	30	basse	81.06683413498152	0
211	vide	17.213866809841097	35	alignement	17.213866809841097	0
212	vide	48.11559158304953	39	basse	48.11559158304953	0
213	vide	106.93113549039656	42	ponctuee	106.93113549039656	0
214	vide	163.62981962983386	43	ponctuee	163.62981962983386	0
215	vide	104.3251679555848	46	ponctuee	104.3251679555848	0
216	vide	111.12775191633695	48	alignement	111.12775191633695	0
217	vide	36.17625940457282	50	alignement	36.17625940457282	0
218	vide	38.20606854126027	60	basse	38.20606854126027	0
219	vide	10.313950459821887	61	basse	10.313950459821887	0
220	vide	40.885622982045575	62	basse	40.885622982045575	0
221	vide	125.11461497357875	67	haute	125.11461497357875	0
222	vide	31.26153276335242	72	alignement	31.26153276335242	0
223	vide	21.168678144493533	76	basse	21.168678144493533	0
224	vide	74.35318623425351	80	alignement	74.35318623425351	0
225	vide	90.44958307000324	81	alignement	90.44958307000324	0
226	vide	52.076576844868136	83	alignement	52.076576844868136	0
227	vide	87.94763687826728	86	ponctuee	87.94763687826728	0
228	vide	53.161740468712686	93	basse	53.161740468712686	0
229	vide	57.88135877661228	95	basse	57.88135877661228	0
230	vide	87.81142342308699	96	basse	87.81142342308699	0
231	vide	104.70621888771807	98	basse	104.70621888771807	0
232	vide	104.87359684038506	99	basse	104.87359684038506	0
233	vide	30.21639229193589	104	ponctuee	30.21639229193589	0
234	vide	33.381930841869924	110	basse	33.381930841869924	0
235	vide	27.963243327513155	121	ponctuee	27.963243327513155	0
236	vide	59.34003270734243	122	basse	59.34003270734243	0
237	vide	180.2972202678017	123	alignement	180.2972202678017	0
238	vide	62.55240896425426	128	ponctuee	62.55240896425426	0
239	vide	40.96221639716545	130	basse	40.96221639716545	0
240	vide	23.340488046456105	154	haute	23.340488046456105	0
241	vide	86.07697513520077	169	ponctuee	86.07697513520077	0
242	vide	52.65778129375592	173	basse	52.65778129375592	0
243	vide	142.07929626582916	174	basse	142.07929626582916	0
244	vide	40.61009211794745	175	ponctuee	40.61009211794745	0
245	vide	95.10280239680125	176	ponctuee	95.10280239680125	0
246	vide	64.4771310301039	179	basse	64.4771310301039	0
247	vide	24.32930342947556	180	alignement	24.32930342947556	0
248	vide	75.59079684629387	190	basse	75.59079684629387	0
249	vide	26.56037529918777	196	ponctuee	26.56037529918777	0
250	vide	33.43472221625411	197	basse	33.43472221625411	0
251	vide	69.33727143504066	207	basse	69.33727143504066	0
252	vide	30.3132738998991	217	ponctuee	30.3132738998991	0
253	vide	50.82829148520764	222	alignement	50.82829148520764	0

## Sheet: Ecological.Data.1
Hedgerow ID	Type of Hedgerow	Nbr of plant layers (upper, mid, under, herbaceous)	Mid-Embankment	Hedgerow Width [m]	Permeability	Nbr of Species	Slope orientation	% Slope	Slope steepness	Ori_vent	Nbre of Polinator Species	Nbre of Fruit Species	m3 of wood total	Adjacent land Use 1	Adjacent land Use 2	Adjacent land Use 3	Présence of micro-habitats in wood	Presence of Grass layer	% coverage of herbaceous layer	Hedgerow continuity	Visible management	Flowers	Presence of Embankment	Presence of ditches	Presence of low or stone wall	Clôture	Deadwood [0-3]	Snags [0,1]
LS01	Tall	4	12	5	4	12	OB	5.225	Moderate	OB	8	6	14.407	River	Field	Path	1	1	30	continue	1	0	0	1	0	/	0	0
LS02	alignement	3	10	6	2	8	OB	5.428571	Moderate	OB	5	4	3.731	Road	Field		1	1	50	continue	0	0	1	0	0	/	0	0
LS03	Tall	3	12	3	2	8	OB	3.785714	Moderate	OB	6	4	13.727	Field	Path		1	1	60	discontinue	1	0	1	0	0	/	0	0
LS04	Tall	2	7	3	1	4	OB	10.833333	Moderate	OB	1	2	0	Road	Residential	Field	0	1	100	discontinue	0	0	1	0	1	/	0	0
LS05	alignement	1	10	0.4	1	1	OB	2.142857	Gentle	OB	0	0	0.357	Field			0	0	0	continue	1	0	0	0	0	/	0	0
LS06	Short	2	2	1	1	5	PER	0.5	Gentle	PER	4	2	0	Wasteland			1	1	100	discontinue	0	0	0	0	0	/	0	0
LS07	ponctuee	2	2.5	1	4	4	PER	2	Gentle	PER	1	0	0.498	Prairie			1	0	0	continue	0	0	0	0	1	/	0	0
LS08	Tall	3	6	5	1	5	PAR	3.4	Moderate	PAR	3	2	0.782	Prairie	Path	Forest	1	0	100	continue	1	0	0	0	1	/	0	0
LS09	Tall	4	16	3	3	7	OB	5.142857	Moderate	OB	5	4	1.905	Road	River	Field	1	1	100	discontinue	1	1	1	1	0	0	0	0
LS10	ponctuee	3	6	6	4	8	PAR	7.375	Moderate	PAR	5	4	0.022	Field	Prairie		1	1	100	continue	1	1	1	0	0	/	0	0
LS11	Tall	3	7	4	4	9	OB	15.375	Moderate	OB	8	5	0.078	Field	Prairie		1	1	80	continue	1	0	1	0	0	0	3	1
LS12	alignement	4	13	3	2	8	PAR	4.909091	Moderate	PAR	4	3	2.852	Road	Prairie		1	1	100	continue	1	0	0	1	0	0	3	1
LS13	Tall	4	5	3	4	7	PER	6	Moderate	PER	5	3	0	Field	Path		1	1	100	continue	1	1	0	1	0	0	0	1
LS14	ponctuee	3	5	5	4	8	PAR	6.571429	Moderate	PAR	6	3	0	Field	River		0	1	100	continue	0	0	0	1	0	0	0	0
LS15	alignement	2	14	0.5	1	1	PAR	5.1875	Moderate	PAR	0	1	9.73	Field	Path		1	1	100	continue	1	0	0	0	0	0	0	0
LS16	Tall	4	20	6	3	13	OB	2.2	Gentle	OB	7	4	9.152	Field			1	1	100	continue	1	0	1	1	0	0	3	0
LS17	alignement	2	7	0.5	1	3	PAR	6.636364	Moderate	PAR	2	3	4.936	Prairie			1	1	100	discontinue	1	0	0	0	0	0	3	0
LS18	alignement	2	20	0.5	1	1	PER	2.5	Gentle	PER	0	0	6.784	Field			1	1	100	discontinue	1	0	1	1	0	0	0	0
LS19	Short	1	2	0.5	1	9	PAR	2.666667	Gentle	PAR	8	4	0	Residential	Road	Connected to another Hedgerow	0	1	100	discontinue	0	0	0	0	0	1	0	0
LS20	Short	2	2	0.5	1	4	PER	4.6	Moderate	PER	2	1	0	Residential	Prairie	Road	1	1	100	discontinue	1	0	1	1	0	1	1	0
LS21	ponctuee	2	2	1	4	12	PAR	3	Gentle	PAR	9	5	0.075	Road			1	1	100	continue	1	0	0	0	0	1	1	0
LS22	alignement	2	7	0.5	1	1	PER	5.1	Moderate	PER	0	1	1.404	Residential	Prairie		0	1	100	continue	1	0	0	0	0	0	0	0
LS23	Short	2	2	0.5	1	4	OB	2.714286	Gentle	OB	4	4	0	Prairie			0	1	100	discontinue	0	0	0	0	0	0	0	0
LS24	alignement	2	10	0.5	1	1	PER	3	Gentle	PER	0	1	3.178	Field	Road		1	1	100	continue	1	0	1	1	0	0	0	0
LS25	ponctuee	4	4	2.5	3	6	PAR	1.25	Gentle	PAR	6	5	0	Field			1	1	100	continue	1	1	0	0	0	0	1	0
LS26	Short	2	2	2	4	3	PER	2	Gentle	PER	2	1	0	Field			1	1	100	discontinue	1	0	0	1	0	0	1	0
LS27	Short	2	2.5	3	4	7	PER	1.666667	Gentle	PER	4	4	0	Field			1	1	50	discontinue	1	0	0	1	0	0	2	0
LS28	Short	2	2.5	1	3	5	PER	1.857143	Gentle	PER	3	3	0	Field			1	1	100	discontinue	1	0	0	0	0	0	1	0
LS29	ponctuee	4	6.5	2.5	3	8	PER	2.846154	Gentle	PER	6	4	1.548	Prairie			1	1	100	continue	1	1	0	0	0	0	2	0
LS30	Short	2	2	5	1	2	PER	1	Gentle	PER	2	0	0	Prairie			0	1	100	discontinue	1	0	0	0	0	1	0	0
LS31	ponctuee	3	4	2	4	3	PER	9.5	Moderate	PER	2	2	0	Field	Path		1	1	70	continue	1	1	0	0	0	0	2	0
LS32	ponctuee	3	5	3	4	9	PER	4	Moderate	PER	8	3	8.97	Field			1	1	100	continue	1	0	0	0	0	0	2	0
ML02	Tall	3	12	3	1	10	PER	27.6	Steep	OB	8	5	3.327	Prairie			1	1	100	discontinue	0	1	1	0	0	0	3	0
ML03	ponctuee	4	4	2	3	9	PER	25.454545	Steep	OB	6	4	6.955	Prairie	Road		1	1	40	continue	1	0	1	1	0	1	2	1
ML04	Tall	4	19	3	2	11	PER	2.666667	Gentle	OB	6	4	8.853	Road	River		1	1	100	continue	1	0	1	1	0	0	1	0
ML05	Tall	4	15	3.5	2	5	PAR	5.473684	Moderate	OB	3	2	6.062	River	River		1	1	100	continue	1	1	1	1	0	0	2	1
ML07	Tall	3	10	3	2	10	OB	21.25	Steep	OB	7	2	1.292	Prairie	Road		1	1	100	discontinue	1	0	1	1	0	1	1	1
ML10	alignement	2	7	0.5	1	3	PER	14.4	Moderate	PAR	2	0	0.72	Path	Wetland		1	1	100	discontinue	1	1	0	0	0	1	0	0
ML12	alignement	2	10	0.5	1	2	PER	5	Moderate	PAR	0	0	3.233	Prairie	Connected to another Hedgerow		1	1	100	continue	1	1	1	0	0	1	0	0
ML13	Tall	3	7	8	4	10	PER	25.25	Steep	OB	7	7	0	Residential	Road		1	1	100	continue	1	0	0	0	0	0	0	0
ML14	Tall	4	10	8	4	8	PER	21.375	Steep	PAR	4	3	0.64	Prairie	Road		1	1	80	continue	1	1	1	1	0	0	3	0
ML15	Short	2	2	2	3	2	OB	17.3	Moderate	OB	2	2	0	Prairie			1	1	100	continue	1	0	0	1	/	/	0	0
ML16	ponctuee	3	5	2	3	3	PER	14.75	Moderate	OB	2	2	1.328	Prairie			0	1	100	discontinue	0	0	0	0	0	1	0	0
ML18	ponctuee	3	4	0.5	2	4	PER	3.1	Moderate	PAR	3	2	0	Prairie	Path		1	1	100	discontinue	1	1	0	0	0	0	0	0
ML19	ponctuee	3	5	3.5	2	6	OB	7.083333	Moderate	OB	4	4	9.596	Prairie			0	1	100	discontinue	1	0	1	0	0	1	0	0
ML20	Short	2	2	0.5	3	6	PAR	5	Moderate	PAR	4	4	0	River	Prairie	Road	1	1	70	discontinue	1	1	0	0	0	1	3	0
ML21	alignement	2	2.5	0.5	1	1	OB	20	Moderate	PAR	0	0	0	Prairie			0	1	100	continue	1	0	1	0	0	0	0	0
ML22	alignement	2	15	2	2	1	PER	10	Moderate	OB	0	0	2.72	Residential	Road		0	1	100	continue	0	0	0	0	0	1	0	0
ML23	ponctuee	3	7	5	3	4	OB	5	Moderate	PER	1	0	0	Residential	Prairie	Road	0	1	100	continue	1	0	0	1	0	1	0	0
ML24	ponctuee	3	5	1	3	8	PAR	14.64	Moderate	PER	5	4	0.053	Prairie	Path		0	1	100	continue	0	0	0	0	0	1	0	0
ML25	Short	2	2.5	1.5	4	4	PER	1.5	Gentle	OB	4	3	0	Prairie	Road		1	1	100	discontinue	1	1	0	1	0	1	1	0
ML26	Short	2	2	2	1	5	OB	1.666667	Gentle	PER	3	3	0	Field			0	1	100	discontinue	1	0	1	1	0	1	0	1
ML27	Short	2	2	1.5	4	4	OB	7.454545	Moderate	OB	4	3	0	Prairie	Road		0	1	100	discontinue	0	0	0	0	0	1	1	0
ML28	Short	2	2	1	3	9	OB	6.857143	Moderate	PER	8	5	0	Prairie	Road		0	1	100	continue	1	0	1	1	0	1	0	0
ML29	Short	3	2.5	2	4	4	OB	7.421053	Moderate	PAR	2	2	0	Prairie	Connected to another Hedgerow	Path	0	1	100	continue	1	1	1	1	0	1	1	0
ML30	Short	2	1.5	1	3	2	PER	23.666667	Steep	PER	2	2	0	Prairie	Road		1	1	100	continue	1	0	0	0	0	1	1	0
ML31	Tall	4	10	3	1	7	PAR	25.714286	Steep	OB	5	4	10.79	Prairie			1	1	100	continue	1	1	1	1	0	1	1	1
ML32	alignement	3	13	2	1	3	PER	10.8	Moderate	PER	2	1	27.38	Prairie	Path		1	1	100	discontinue	1	1	0	0	1	0	3	0
ML33	ponctuee	3	15	2	1	4	OB	4.272727	Moderate	PER	3	3	12.702	Prairie	Path		1	1	100	continue	1	0	0	0	0	1	1	0
ML34	Tall	4	8	3.5	4	11	PAR	9.571429	Moderate	PER	6	5	1.732	Prairie	River		1	1	100	discontinue	1	1	0	0	0	1	1	1
ML36	alignement	2	12	0.5	1	1	PER	21.833333	Steep	PAR	0	0	2.968	Prairie	Prairie		1	1	100	discontinue	1	1	0	0	0	1	2	1
ML37	ponctuee	3	7	2	4	11	PAR	4	Moderate	PAR	7	4	0.799	Prairie	Path		1	1	100	continue	1	0	0	0	0	0	0	0
ML39	alignement	2	12	0.5	3	1	PER	21.3	Steep	OB	0	0	11.561	Prairie			0	1	100	discontinue	0	0	0	0	0	1	0	0
ML40	alignement	2	10	1	1	5	PER	17.25	Moderate	PAR	2	0	3.293	Prairie	Path		1	1	40	continue	1	0	1	0	1	1	0	0
ST01	Tall	3	14	4	4	8	OB	14.857143	Moderate	OB	5	3	0	Prairie	Road		1	1	100	continue	1	0	1	0	0	1	1	0
ST02	Short	2	3.5	1	4	6	PAR	6.571429	Moderate	OB	5	2	0	Prairie	Residential		0	1	100	discontinue	0	0	1	0	0	/	0	0
ST03	Tall	3	7	4	2	13	OB	8	Moderate	PAR	10	8	0	Prairie			0	1	80	discontinue	0	0	0	0	1	/	0	0
ST04	Tall	2	14	4	2	6	PER	6.142857	Moderate	PAR	4	4	0	Prairie			1	1	100	continue	0	1	1	0	1	/	0	0
ST05	alignement	1	10	0.5	1	2	PAR	1.5	Gentle	PER	0	0	0	Prairie			1	1	80	discontinue	0	1	0	0	1	/	0	0
ST06	Short	1	2.5	1	2	9	OB	21.875	Steep	OB	5	4	0	Prairie	Path		0	0	0	discontinue	0	0	0	0	0	/	0	0
ST07	Tall	4	10	5	2	11	PER	18.083333	Moderate	PAR	9	7	0	Prairie	Field		1	1	100	discontinue	0	1	0	0	0	/	0	0
ST08	Short	2	6	2	4	5	PAR	14.75	Moderate	PER	4	3	0	Prairie	Path		1	1	100	continue	1	1	1	0	0	/	0	0
ST09	ponctuee	3	7	5	2	10	OB	21.4	Steep	PAR	10	6	0	Forest	Prairie		1	1	100	continue	1	1	1	0	0	/	0	0
ST10	alignement	2	13	8	4	5	PER	3.916667	Moderate	OB	2	1	0	Field	Prairie		1	1	100	continue	0	0	1	0	1	/	0	0
ST11	Tall	4	30	4	1	5	PER	3.25	Moderate	OB	3	2	15.315	Prairie	River	Connected to another Hedgerow	1	0	0	continue	1	0	0	1	0	/	0	1
ST12	Tall	4	15	6	3	10	PAR	8.777778	Moderate	PER	8	4	1.568	Prairie	Path	Residential	1	1	100	continue	0	0	1	0	0	0	2	0
ST13	ponctuee	4	7	1.5	4	10	PAR	6.571429	Moderate	OB	6	5	1.398	Prairie	River	Road	1	1	100	continue	1	0	0	0	0	0	1	0
ST14	Short	3	3	2.5	4	5	PER	9.666667	Moderate	PAR	4	2	0	Prairie	Path	Connected to another Hedgerow	1	1	80	continue	1	0	1	1	0	0	2	0
ST15	ponctuee	3	2	2	2	9	PAR	19.5	Moderate	OB	7	5	6.327	Field	Path		0	1	100	continue	1	1	1	0	1	0	2	0
ST16	Short	2	2.5	1.5	3	9	OB	17.666667	Moderate	OB	8	6	0	Field	Path		1	1	100	continue	1	1	1	0	1	1	0	0
ST17	ponctuee	4	2.5	4	4	10	OB	17.9	Moderate	PER	7	6	0.298	Path	Prairie		0	1	100	continue	1	1	1	0	1	0	1	0
ST18	Short	2	2	4	4	6	PER	24.3	Steep	PER	6	3	0	Prairie	Path		1	1	100	continue	1	1	0	0	1	0	2	0
ST19	Short	2	2	2	4	7	OB	14.45	Moderate	OB	6	6	0	Prairie	Road		0	1	100	continue	0	1	1	0	0	1	0	0
ST20	ponctuee	3	3	4	2	10	PAR	3.333333	Moderate	PER	8	6	0.026	Prairie	Path		0	1	100	continue	1	1	1	1	0	1	1	0
ST21	Tall	4	10	10	4	12	PAR	2.666667	Gentle	PAR	10	7	1.73	Prairie	Path		1	1	75	continue	1	1	1	0	0	1	2	0
ST22	Short	2	2	1.5	1	4	OB	3.25	Moderate	PER	2	2	0	Prairie	Path		1	1	100	continue	0	1	0	0	1	0	3	0
ST23	Tall	4	10	3	3	7	OB	13.222222	Moderate	PER	5	4	8.792	Prairie	Path		0	1	100	continue	0	0	0	0	0	0	1	1
ST24	alignement	2	10	2	1	2	OB	13	Moderate	PER	1	1	1.143	Prairie			1	1	100	continue	1	0	1	0	0	1	3	0
ST25	alignement	2	15	1	1	6	PAR	5.25	Moderate	OB	3	2	2.56	Prairie	Road		1	1	100	continue	0	0	1	0	0	0	0	0
ST26	ponctuee	3	8	4	2	9	OB	15	Moderate	PER	6	5	0.213	Prairie			1	1	100	discontinue	1	0	1	1	0	0	0	0
ST27	alignement	2	3	1	1	6	OB	16.8	Moderate	PAR	5	4	0.132	Prairie			1	1	100	discontinue	1	1	1	0	0	0	2	0
ST28	ponctuee	3	5	4	3	4	OB	4.6	Moderate	OB	3	4	1.428	Prairie			0	1	100	continue	1	1	0	0	0	1	0	0
ST29	ponctuee	4	5	6	4	8	PER	12.333333	Moderate	PAR	6	6	1.907	Field	Path		1	1	100	continue	0	0	0	0	0	0	1	1
ST31	alignement	3	8	3	2	4	OB	5.5	Moderate	PER	3	4	0.187	Prairie	Path		1	1	100	discontinue	0	1	1	0	1	0	3	0
ST32	alignement	3	6	3	1	2	PER	6.75	Moderate	PAR	1	2	0.324	Field	Path		1	1	100	discontinue	1	0	1	1	0	0	0	0
ST33	alignement	3	4	2	1	4	OB	5.444444	Moderate	PER	3	4	0.325	Field	Path		1	1	100	discontinue	0	0	1	0	0	0	0	0
VM01	Short	2	2.5	2.5	4	7	PER	14.125	Moderate	PAR	5	4	0	Field			1	1	100	continue	0	0	1	0	0	0	2	0
VM02	ponctuee	3	2.5	3	4	7	OB	9.090909	Moderate	PAR	5	4	0.194	Field	Path		1	1	100	continue	1	1	1	0	0	/	0	0
VM03	Tall	3	7	5	3	6	OB	19.5	Moderate	OB	6	6	1.056	Field	Path		1	1	80	continue	1	1	0	0	0	/	0	0
VM04	alignement	3	7	8	2	8	PER	14	Moderate	PAR	8	7	3.018	Field	Residential	Road	1	1	100	continue	0	0	0	0	0	/	0	0
VM05	Tall	3	7	4	2	12	PER	14.833333	Moderate	PER	5	5	1.251	Prairie	Path		1	1	100	discontinue	0	1	1	0	0	0	0	0
VM06	Tall	4	5	7	4	7	PER	11	Moderate	OB	3	1	0.811	Residential	River		1	1	100	continue	1	1	0	0	0	1	0	0
VM07	Tall	7	12	1	1	7	OB	1.5	Gentle	OB	4	4	3.15	Prairie			1	1	80	discontinue	1	0	0	1	0	0	0	0
VM08	Short	2	2.5	2	2	4	PER	16.333333	Moderate	OB	5	4	0	Residential	Prairie		0	1	100	discontinue	0	1	1	0	1	0	0	0
VM09	ponctuee	3	4	2.5	4	9	OB	24.722222	Steep	PER	7	5	6.584	Field			1	1	100	continue	1	1	1	0	1	0	0	0
VM10	Tall	4	5	4	3	11	PER	24	Steep	OB	8	4	0	Field	Path		1	1	100	continue	1	1	1	0	0	/	0	1
VM11	alignement	3	10	1	1	4	PAR	19.375	Moderate	PER	4	4	0.345	Field	Connected to another Hedgerow		1	1	100	continue	1	0	1	0	0	0	0	0
VM12	ponctuee	3	6.5	5.5	4	6	PER	4.285714	Moderate	PAR	4	5	2.679	Field			1	1	100	discontinue	1	0	1	0	0	0	0	0
VM13	alignement	2	7	0.4	1	1	OB	17.5	Moderate	PAR	0	1	0.345	Field	Connected to another Hedgerow		1	1	100	continue	1	1	0	0	0	0	0	0
VM14	alignement	2	4	5	2	1	PER	14.153846	Moderate	OB	2	1	2.336	Prairie			1	1	100	continue	1	0	0	0	0	0	0	0
VM16	alignement	2	7	0.5	1	2	PER	5.083333	Moderate	OB	0	0	2.01	Residential	Prairie	Road	1	1	90	continue	1	1	0	0	0	0	3	0
VM17	alignement	3	20	2	1	9	PER	4.043478	Moderate	PER	5	5	1.82	Path	Prairie		0	1	50	continue	1	0	1	0	0	0	0	0
VM18	alignement	2	5	5	2	1	OB	1	Gentle	OB	0	1	8.55	Prairie	River	Road	0	1	100	continue	1	1	1	0	1	0	0	0
VM19	alignement	2	15	1	1	1	PAR	11.75	Moderate	PER	0	1	0.219	Field	Prairie		1	1	50	discontinue	1	0	0	0	0	0	0	0
VM20	Tall	4	5	2.5	4	12	OB	10.333333	Moderate	OB	9	7	0.271	Prairie	Path		0	1	100	continue	1	0	0	0	0	0	0	0
VM21	ponctuee	3	7	2	3	6	PER	21.714286	Steep	PER	6	5	0.351	Prairie	Path		1	1	100	continue	0	1	1	0	0	1	3	0
VM22	Short	2	2	1.5	3	4	PAR	17	Moderate	PAR	4	3	1.091	Residential	Path		1	1	90	continue	1	1	0	0	0	1	0	0
VM23	Short	2	2	2	4	7	PER	26.6	Steep	PER	6	5	0	Prairie	Path		0	1	100	continue	1	1	0	0	0	1	0	0
VM24	Tall	4	7	7.5	4	10	PAR	26.166667	Steep	OB	8	8	1.615	Field			0	1	100	continue	0	1	1	0	0	0	1	0
VM25	Tall	4	20	4.5	3	11	PER	2.764706	Gentle	PER	7	3	4.065	Path	River		1	1	100	continue	0	1	0	0	0	0	1	1
VM26	Short	2	2.5	1.5	3	6	OB	10.75	Moderate	PER	5	4	0	Field	Path		1	1	100	continue	1	0	1	1	0	0	3	0
VM27	Short	2	2.5	3.5	3	7	OB	22.038462	Steep	OB	6	5	0	Field			0	1	100	continue	1	0	1	0	0	0	0	0
VM28	ponctuee	3	3	8	2	5	OB	6	Moderate	OB	5	2	0	Field			0	1	100	continue	1	1	1	0	0	0	1	0
VM29	Short	2	0.5	1	1	2	PAR	5.5	Moderate	OB	2	2	0	Field	Path		1	1	100	discontinue	0	1	0	0	0	0	0	0
VM30	Short	3	2.5	4.5	1	8	PER	10.625	Moderate	OB	6	5	0	Field	Path		0	1	100	continue	0	1	0	0	0	0	0	0
VM31	ponctuee	3	3	2	3	7	OB	15.833333	Moderate	PER	6	6	0	Prairie			0	1	100	discontinue	1	0	1	0	1	0	0	0
VM32	ponctuee	3	4	2	3	9	OB	14.111111	Moderate	OB	7	6	0	Path			1	1	100	continue	1	1	1	0	0	0	1	0
VM33	ponctuee	3	2.5	3	2	8	OB	22.5	Steep	PER	5	3	0	Field			1	1	100	continue	1	0	1	0	0	0	0	0
								6.48551

## Sheet: Ecological.Data.2
Hedgerow ID	Species
LS01	orme : 15; peuplier 1 m	oui
LS02	erable : 40 ; 60; 40; 40 ; peuplier: 10	oui
LS03	8 frenes : 60; 60; 50*4; 40; 90; 7 ormes: 10-15	oui
LS04	/	non
LS05	20-50	oui
LS06	/	non
LS07	1 erable: 30-40 cm; 1 frêne : 15 cm	oui
LS08	4 frênes: 10-15; 2 noyers: 30	oui
LS09	abs	non
LS10	1 frêne : 10cm, noyer 30cm	non
LS11	2 orme: 10-15	non
LS12	7 resineux: 35+4, 20, 40*2; 1 noyer: 70	oui
LS13	/	non
LS14	/	non
LS15	bcp noyer: 40-50	oui
LS16	bcp noyer: 40-50	oui
LS17	1 noyer: 50, 6 noyer: 40; 1 prunier: 30	oui
LS18	4 peuplier: 40; 2 peuplier: 50; 3 peuplier: 30	oui
LS19	/	non
LS20	/	non
LS21	1 frene: 20	non
LS22	12 noyers: 20	oui
LS23	/	non
LS24	3 noyers: 40; 1 noyer: 50	oui
LS25	/	non
LS26	/	non
LS27	/	non
LS28	/	non
LS29	3 frene: 30; 1 chene: 40	oui
LS30	/	non
LS31	/	non
LS32	2 peupliers: 50-40; 1 saule: 1m50	oui
ML02	saule: 70; chene: 40, 30*3	oui
ML03	chene: 30, 20, 20, 3*30, 1m, 4*30-50, 4*30; frene : 4*15-20; merisier: 6*15	oui
ML04	5 aulnes: 30; 6 chenes: 40; 2 frenes: 10-15	oui
ML05	frene: 10, 10-15 aulnes: 20-30	non
ML07	2 frenes avec plusieurs troncs: 10-15; 6 chenes: 20-30; 1 bouleau:20	non
ML10	9 cupressus: 20	oui
ML12	6 chenes: 30-40; 1 frene: 20	oui
ML13	/	non
ML14	bcp de charme et erable: env 10 cm	non
ML15	/	oui
ML16	chene: 60, 20, 20, 20	oui
ML18	/	non
ML19	chenes: 4*60	oui
ML20	/	non
ML21	/	non
ML22	17 resineux: 15-20	non
ML23	/	oui
ML24	chene: 10-15; 2 peupliers: 10-15	non
ML25	/	non
ML26	/	non
ML27	/	non
ML28	/	non
ML29	/	non
ML30	/	non
ML31	chene: 10*30-60; 3*15-20, 25	oui
ML32	70*2, 35, 40, 80, 20, 15, 40, 70, 45, 35, 1m20	oui
ML33	6 chenes P: 70*3; 40*2; 75*1	oui
ML34	5 peupliers: 30, 30, 30, 20, 30; chene: 15; 3 resineux: 20	oui
ML36	chene : 40*4	oui
ML37	1 peuplier: 40; 1 saule: 40	oui
ML39	chene: 3*50, 2*30, 3*40, 1*20, 2*60	oui
ML40	1 peuplier: 40; 2 frene: 30; 8 erables: 20*5, 30, 50, 40	oui
ST01	/	non
ST02	/	non
ST03	/	non
ST04	/	non
ST05	/	non
ST06	/	non
ST07	/	non
ST08	/	non
ST09	/	non
ST10	/	non
ST11	5 frenes: 20 et 30; 10aine de chenes: 40	oui
ST12	chene: 40-30*2 et 20*4	oui
ST13	1 noyer: 40; 1 chene : 35, 1 chene: 20 et peuplier: 30	oui
ST14	/	non
ST15	1 noyer: 1m; 4 frenes: 20	oui
ST16	/	non
ST17	2 noyers: 15-20; 1 frene: 20	non
ST18	/	non
ST19	/	non
ST20	1 frene: 15	non
ST21	chene: 2*30, 1*20, 2*15, 1*35	oui
ST22	/	non
ST23	chene: 1*60, 1*10, 1*15, 2*50, 1*1m, 1*40, 1*20	oui
ST24	3 chenes avec 9 troncs: 20	oui
ST25	peuplier: 40, 60, 40, 40	oui
ST26	chene: 30, 15; frene: 15; noyer: 15	oui
ST27	6 chenes P: 10	non
ST28	noyer: 40, 30, 15, 20,20,30,20	oui
ST29	frene: 30; merisier: 10; noyer: 15, 50, 35, 30	oui
ST31	2*30, 1*30, 2*15	oui
ST32	noyer avec plusieurs troncs: 20,15, 15,15,15,15	oui
ST33	noyer: 3*10, 20, 20	oui
VM01	absence	non
VM02	merisier: 50	oui
VM03	noyer: 50cm	oui
VM04	merisier: 30; 4 noyer: 40; saule: 15	oui
VM05	3 frene: 15; +ieurs noyer: 20cm	non
VM06	1 frene: 15; 1 noye: 40	oui
VM07	1 saule: 60-70; 4 aulnes: 20-30, 7 aulnes: 15; 2 frenes: 30-40	oui
VM08	/	non
VM09	+eurs cole frene: 1 ; 3 noyer; 1 erable: 4	oui
VM10	1 frene: 30 ; 2 orme: 10	oui
VM11	3 noyers: 50; 40; 40	oui
VM12	1 noyer: 30	oui
VM13	5 noyers: 30; 1 noyer: 40; 1 noyer: 15; 1 noyer: 20	oui
VM14	15 pommiers: 30	oui
VM16	5 erables negender: 20-30 et 5 myrobolan 20-30	oui
VM17	19 peupliers: 30	oui
VM18	2 pommiers: 20; 1 pommier: 15	non
VM19	3 peupliers: 15; 2 peupliers: 10	non
VM20	1 noyer: 20*3	non
VM21	3 noyers : 20; 1 noyer: 40	oui
VM22	/	non
VM23	/	non
VM24	2 merisier: 40, 30, 20; 1 noyer: 40	oui
VM25	frene: 50, 20, 50, 10, 15, 20; aulne: 20, 15, 10, 10, 10, 35, 20, 20, 30	oui
VM26	/	non
VM27	/	non
VM28	/	non
VM29	/	non
VM30	/	non
VM31	/	non
VM32	/	non
VM33	/	non
