# Supplementary material for: Integrating adaptation pathways and Ostrom’s framework for sustainable governance of social-ecological systems in a changing world
Source: PeerJ journal article supplement (doi:10.7717/peerj.18938), 2025-02-24
Supplement: FileS3.zip [file Supplementary.S3.Pictures.GIS.Land.Use.Hedgerows.Rural.and.PeriUrban.1946.1989.2000.2019.pdf › Supplementary.S3.Pictures.GIS.Land.Use.Hedgerows.Rural.and.PeriUrban.1946.1989.2000.2019.pdf]

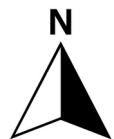

0 500 1 000 m

A horizontal scale bar with a black segment on the left and a white segment on the right, corresponding to the 0, 500, and 1 000 m markings.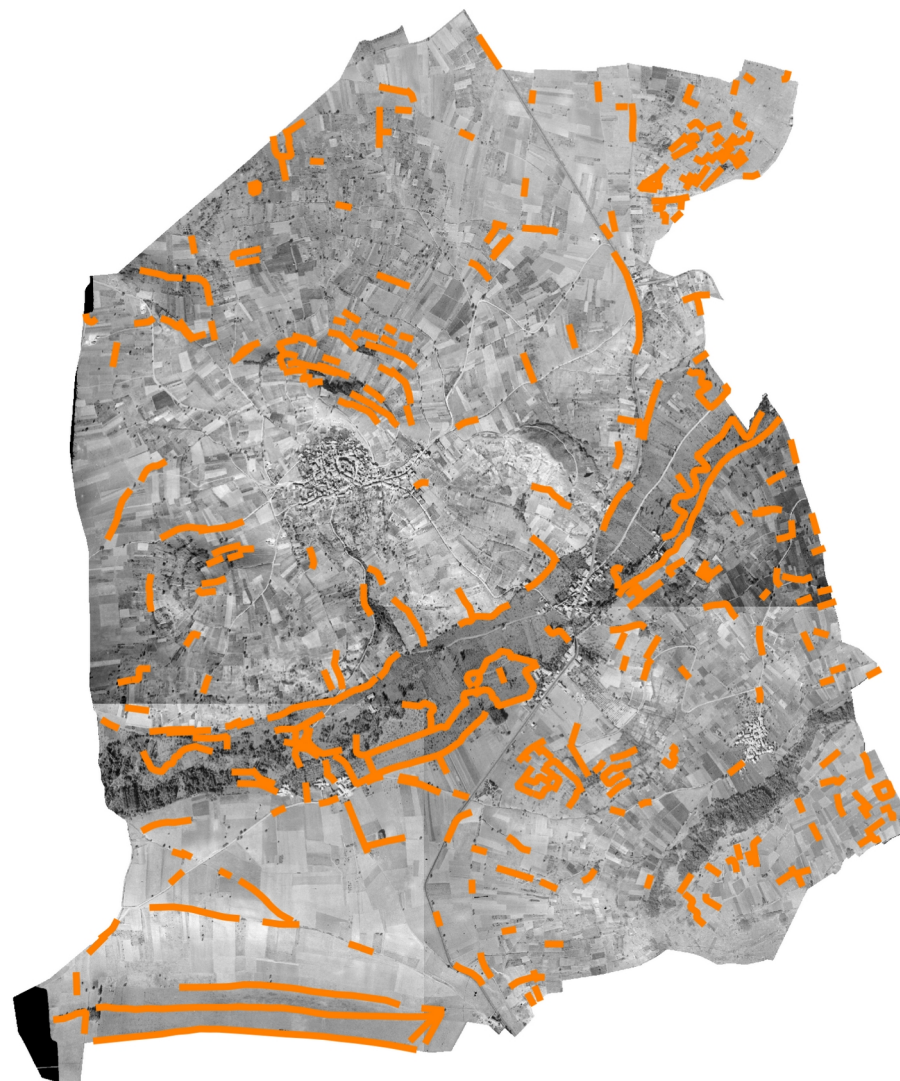

Veyre Monton 1946 (peri-urban)

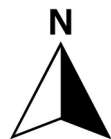

0 500 1 000 m

A horizontal scale bar with a black segment on the left and a white segment on the right, representing distances of 0, 500, and 1 000 meters.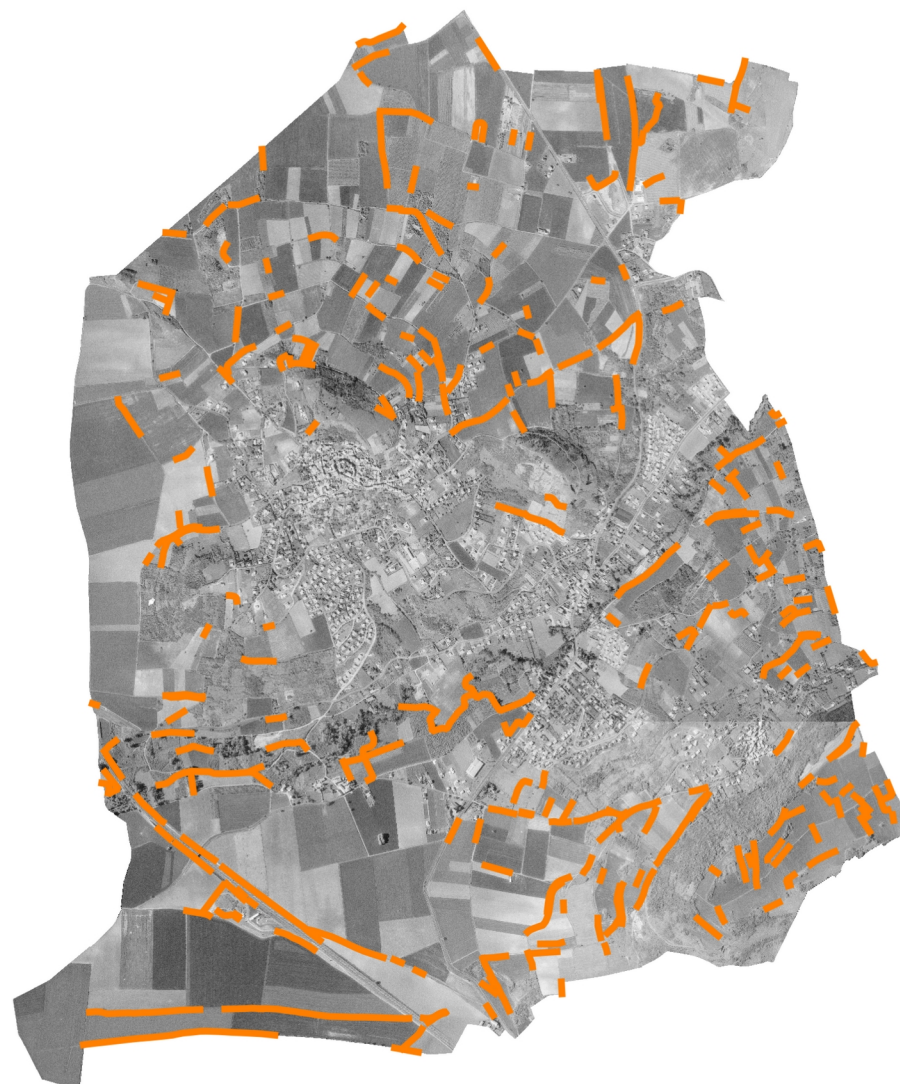

Veyre Monton 1989 (peri-urban)



0 500 1 000 m

A horizontal scale bar with a black segment on the left and a white segment on the right, corresponding to the 0, 500, and 1 000 m markings.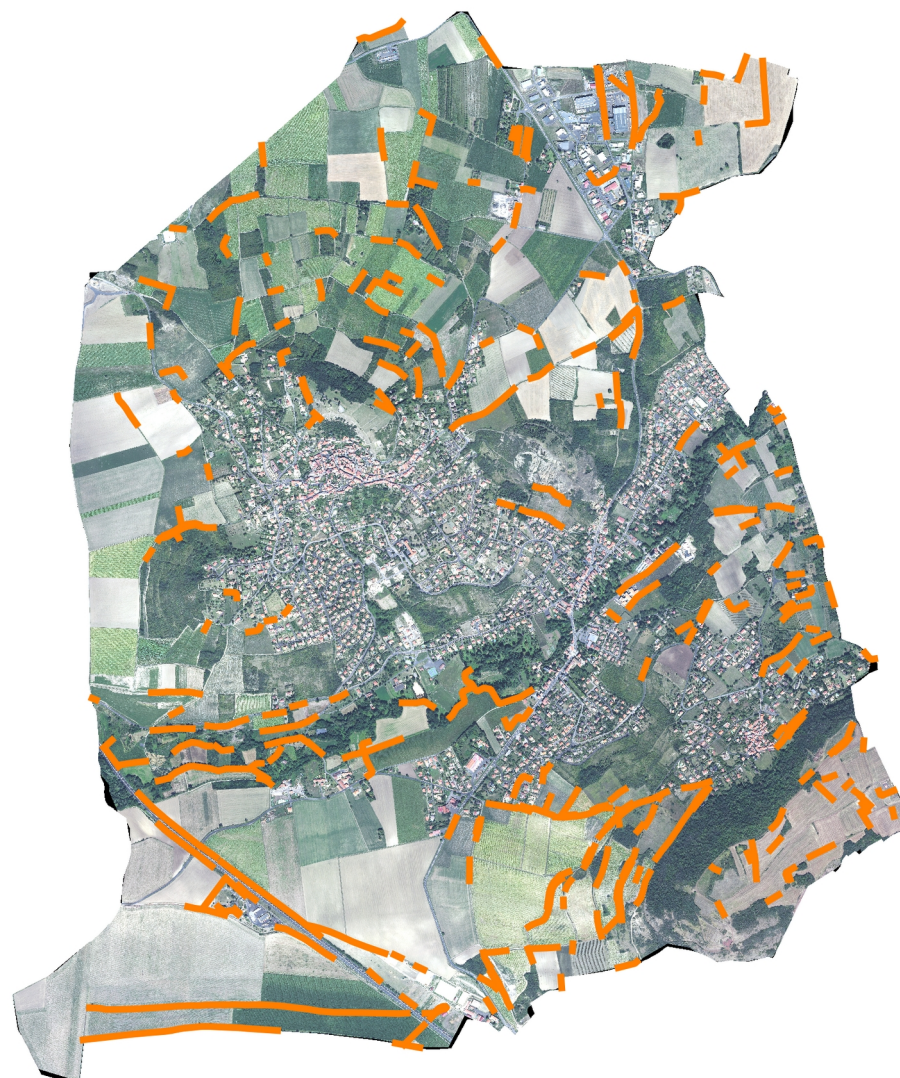

Veyre Monton 2000 (peri-urban)





0 500 1 000 m

A horizontal scale bar with a black segment on the left and a white segment on the right, corresponding to the 0, 500, and 1 000 m markings.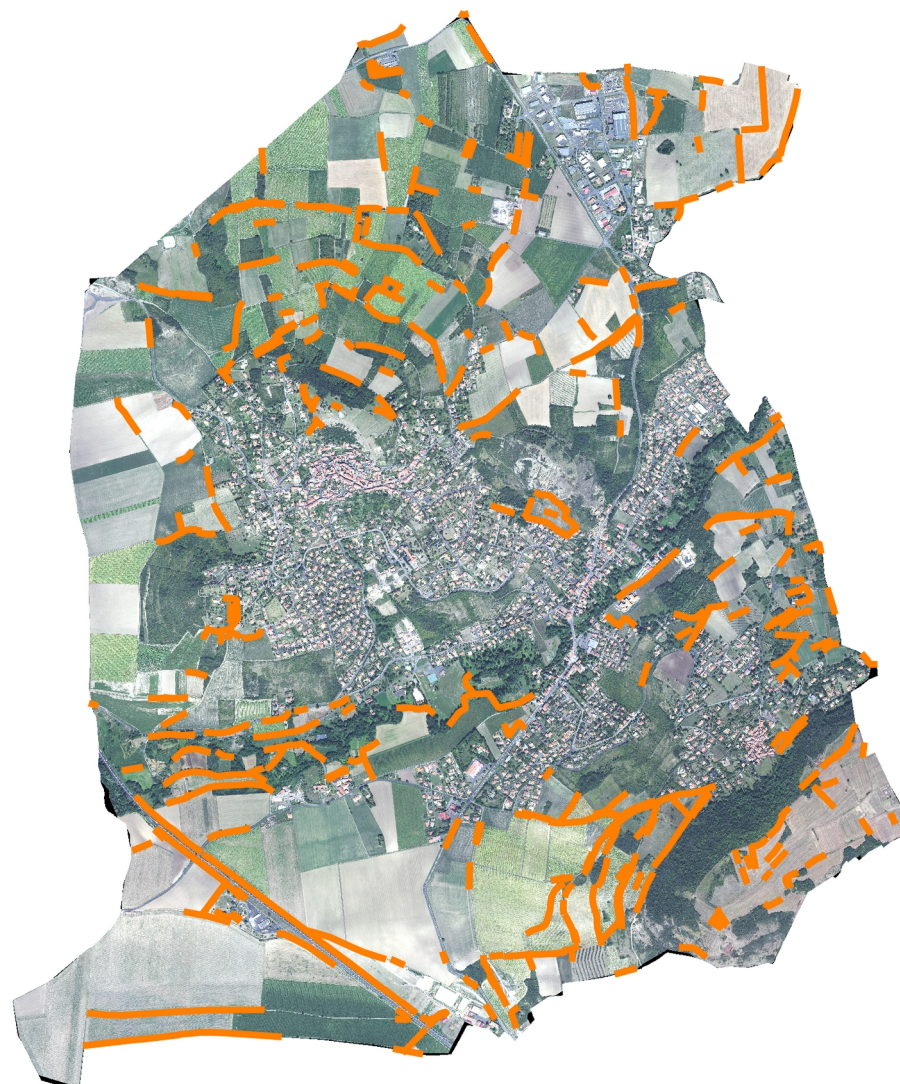

Veyre Monton 2019 (peri-urban)



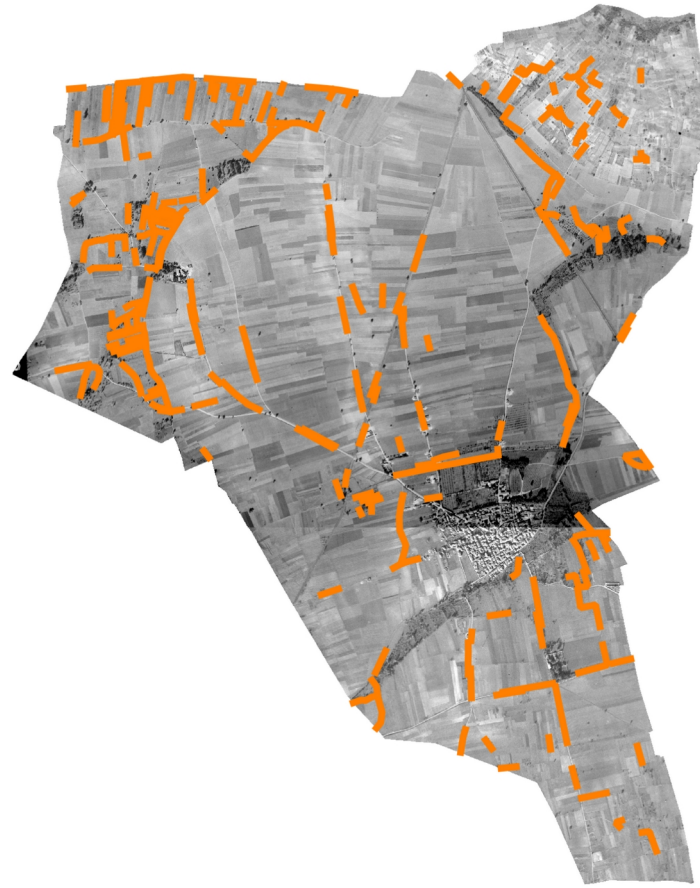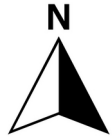

0 500 1 000 m

A horizontal scale bar with a black segment on the left and a white segment on the right, corresponding to the 0, 500, and 1 000 m markings.

La Sauvetat 1946 (rural)

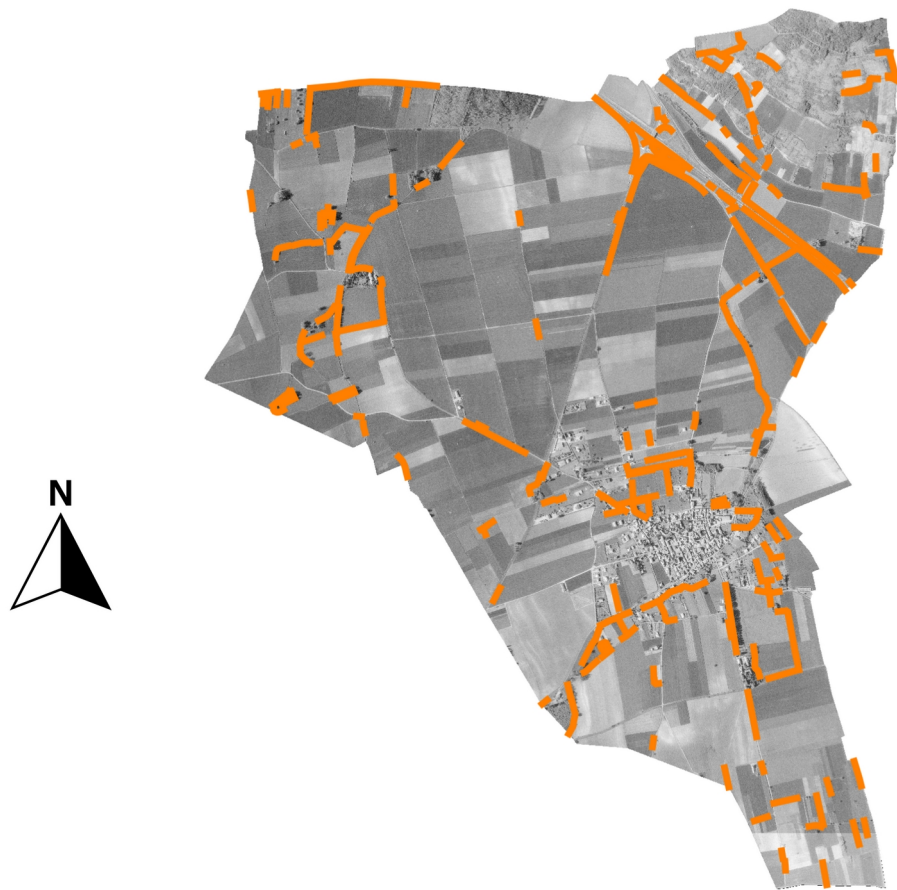

0 500 1 000 m



La Sauvetat 1989 (rural)

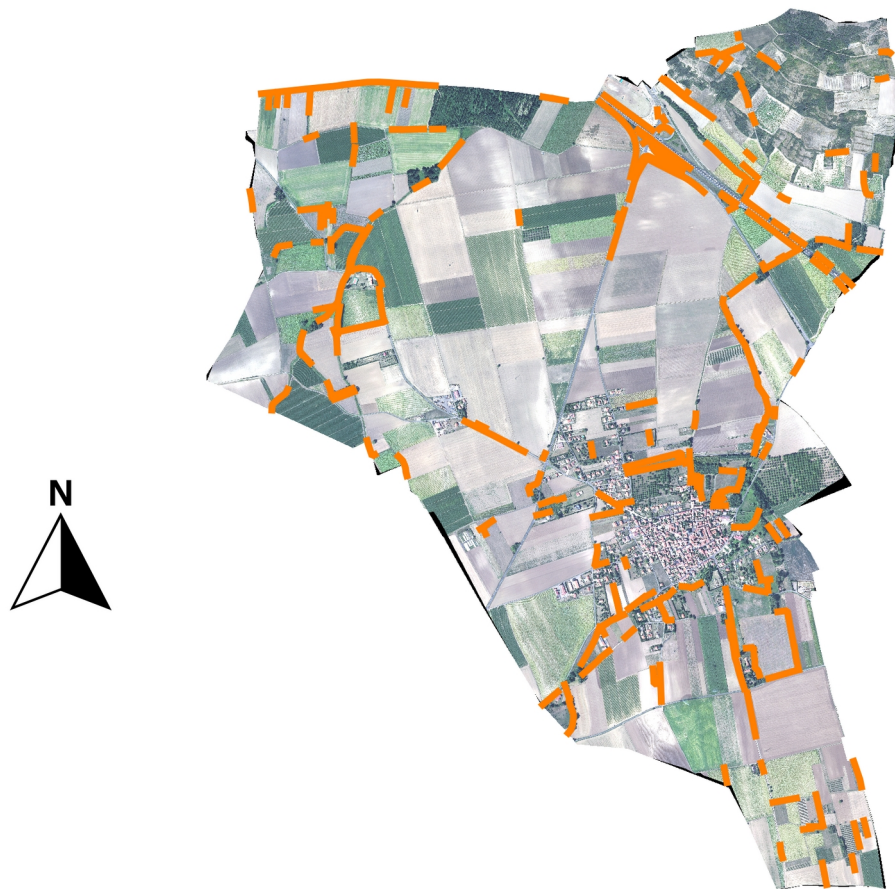

0 500 1 000 m

A horizontal scale bar with a black segment on the left and a white segment on the right, representing the distance between 0 and 1,000 meters.

La Sauvetat 2000 (rural)



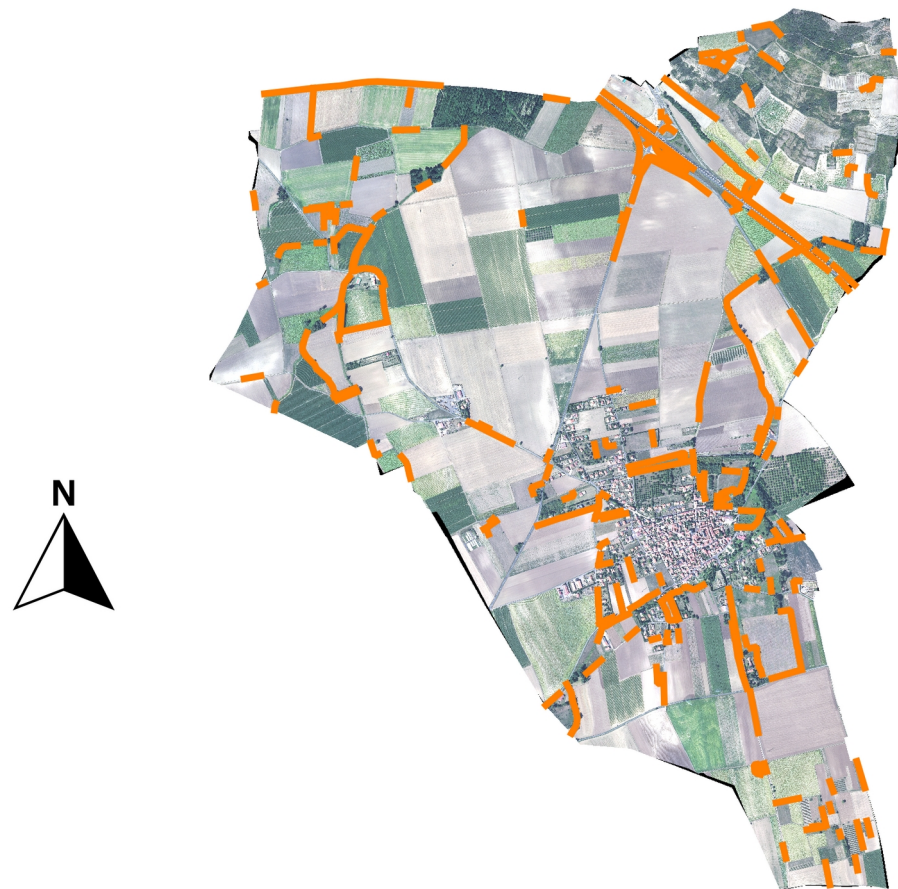

0 500 1 000 m

A horizontal scale bar with a black segment on the left and a white segment on the right, representing the distance between the 0 and 500 meter marks.

La Sauvetat 2019 (rural)
