# Supplementary material for: Integrating adaptation pathways and Ostrom’s framework for sustainable governance of social-ecological systems in a changing world
Source: PeerJ journal article supplement (doi:10.7717/peerj.18938), 2025-02-24
Supplement: FileS4.zip [file Données_terrain_30-07-21.xlsx]

## Sheet: Feuil1
Num haie	Type de haie	Nbr de strates	Hauteur moyenne	Largeur	Permeabilite	Nbr especes	Ori_Pente	% de pentes	Pentes	Ori_vent	Nbr_especes_melliferes	Nbr_especes_fruits	m3 de bois total	Contexte 1	Contexte 2	Contexte 3	Présence de microdendrohabitat	Strate herbacée	% de recouvrement de la strate herbacée	Continuité	Gestion visible	Fleurs	Talus	Fossé	Muret/tas de pierre	Clôture	Bois mort	Arbre mort sur pied (chandelle)
LS01	haute	4	12	5	4	12	OB	5.225	MOYENNE	OB	8	6	14.407	cours d'eau	culture	chemin	oui	oui	30	continue	oui	non	non	oui	non	/	0	0
LS02	alignement	3	10	6	2	8	OB	5.428571	MOYENNE	OB	5	4	3.731	route	culture		oui	oui	50	continue	non	non	oui	non	non	/	0	0
LS03	haute	3	12	3	2	8	OB	3.785714	MOYENNE	OB	6	4	13.727	culture	chemin		oui	oui	60	discontinue	oui	non	oui	non	non	/	0	0
LS04	haute	2	7	3	1	4	OB	10.833333	MOYENNE	OB	1	2	0	route	habitation	culture	non	oui	100	discontinue	non	non	oui	non	oui	/	0	0
LS05	alignement	1	10	0.4	1	1	OB	2.142857	FAIBLE	OB	0	0	0.357	culture			non	non	0	continue	oui	non	non	non	non	/	0	0
LS06	basse	2	2	1	1	5	PER	0.5	FAIBLE	PER	4	2	0	friche			oui	oui	100	discontinue	non	non	non	non	non	/	0	0
LS07	ponctuee	2	2.5	1	4	4	PER	2	FAIBLE	PER	1	0	0.498	prairie			oui	non	0	continue	non	non	non	non	oui	/	0	0
LS08	haute	3	6	5	1	5	PAR	3.4	MOYENNE	PAR	3	2	0.782	prairie	chemin	bosquet	oui	non	100	continue	oui	non	non	non	oui	/	0	0
LS09	haute	4	16	3	3	7	OB	5.142857	MOYENNE	OB	5	4	1.905	route	cours d'eau	culture	oui	oui	100	discontinue	oui	oui	oui	oui	non	non	0	0
LS10	ponctuee	3	6	6	4	8	PAR	7.375	MOYENNE	PAR	5	4	0.022	culture	prairie		oui	oui	100	continue	oui	oui	oui	non	non	/	0	0
LS11	haute	3	7	4	4	9	OB	15.375	MOYENNE	OB	8	5	0.078	culture	prairie		oui	oui	80	continue	oui	non	oui	non	non	non	3	1
LS12	alignement	4	13	3	2	8	PAR	4.909091	MOYENNE	PAR	4	3	2.852	route	prairie		oui	oui	100	continue	oui	non	non	oui	non	non	3	1
LS13	haute	4	5	3	4	7	PER	6	MOYENNE	PER	5	3	0	culture	chemin		oui	oui	100	continue	oui	oui	non	oui	non	non	0	1
LS14	ponctuee	3	5	5	4	8	PAR	6.571429	MOYENNE	PAR	6	3	0	culture	cours d'eau		non	oui	100	continue	non	non	non	oui	non	non	0	0
LS15	alignement	2	14	0.5	1	1	PAR	5.1875	MOYENNE	PAR	0	1	9.73	culture	chemin		oui	oui	100	continue	oui	non	non	non	non	non	0	0
LS16	haute	4	20	6	3	13	OB	2.2	FAIBLE	OB	7	4	9.152	culture			oui	oui	100	continue	oui	non	oui	oui	non	non	3	0
LS17	alignement	2	7	0.5	1	3	PAR	6.636364	MOYENNE	PAR	2	3	4.936	prairie			oui	oui	100	discontinue	oui	non	non	non	non	non	3	0
LS18	alignement	2	20	0.5	1	1	PER	2.5	FAIBLE	PER	0	0	6.784	culture			oui	oui	100	discontinue	oui	non	oui	oui	non	non	0	0
LS19	basse	1	2	0.5	1	9	PAR	2.666667	FAIBLE	PAR	8	4	0	habitation	route	connecte a une autre haie	non	oui	100	discontinue	non	non	non	non	non	oui	0	0
LS20	basse	2	2	0.5	1	4	PER	4.6	MOYENNE	PER	2	1	0	habitation	prairie	route	oui	oui	100	discontinue	oui	non	oui	oui	non	oui	1	0
LS21	ponctuee	2	2	1	4	12	PAR	3	FAIBLE	PAR	9	5	0.075	route			oui	oui	100	continue	oui	non	non	non	non	oui	1	0
LS22	alignement	2	7	0.5	1	1	PER	5.1	MOYENNE	PER	0	1	1.404	habitation	prairie		non	oui	100	continue	oui	non	non	non	non	non	0	0
LS23	basse	2	2	0.5	1	4	OB	2.714286	FAIBLE	OB	4	4	0	prairie			non	oui	100	discontinue	non	non	non	non	non	non	0	0
LS24	alignement	2	10	0.5	1	1	PER	3	FAIBLE	PER	0	1	3.178	culture	route		oui	oui	100	continue	oui	non	oui	oui	non	non	0	0
LS25	ponctuee	4	4	2.5	3	6	PAR	1.25	FAIBLE	PAR	6	5	0	culture			oui	oui	100	continue	oui	oui	non	non	non	non	1	0
LS26	basse	2	2	2	4	3	PER	2	FAIBLE	PER	2	1	0	culture			oui	oui	100	discontinue	oui	non	non	oui	non	non	1	0
LS27	basse	2	2.5	3	4	7	PER	1.666667	FAIBLE	PER	4	4	0	culture			oui	oui	50	discontinue	oui	non	non	oui	non	non	2	0
LS28	basse	2	2.5	1	3	5	PER	1.857143	FAIBLE	PER	3	3	0	culture			oui	oui	100	discontinue	oui	non	non	non	non	non	1	0
LS29	ponctuee	4	6.5	2.5	3	8	PER	2.846154	FAIBLE	PER	6	4	1.548	prairie			oui	oui	100	continue	oui	oui	non	non	non	non	2	0
LS30	basse	2	2	5	1	2	PER	1	FAIBLE	PER	2	0	0	prairie			non	oui	100	discontinue	oui	non	non	non	non	oui	0	0
LS31	ponctuee	3	4	2	4	3	PER	9.5	MOYENNE	PER	2	2	0	culture	chemin		oui	oui	70	continue	oui	oui	non	non	non	non	2	0
LS32	ponctuee	3	5	3	4	9	PER	4	MOYENNE	PER	8	3	8.97	culture			oui	oui	100	continue	oui	non	non	non	non	non	2	0
ML02	haute	3	12	3	1	10	PER	27.6	FORTE	OB	8	5	3.327	prairie			oui	oui	100	discontinue	non	oui	oui	non	non	non	3	0
ML03	ponctuee	4	4	2	3	9	PER	25.454545	FORTE	OB	6	4	6.955	prairie	route		oui	oui	40	continue	oui	non	oui	oui	non	oui	2	1
ML04	haute	4	19	3	2	11	PER	2.666667	FAIBLE	OB	6	4	8.853	route	cours d'eau		oui	oui	100	continue	oui	non	oui	oui	non	non	1	0
ML05	haute	4	15	3.5	2	5	PAR	5.473684	MOYENNE	OB	3	2	6.062	cours	cours d'eau		oui	oui	100	continue	oui	oui	oui	oui	non	non	2	1
ML07	haute	3	10	3	2	10	OB	21.25	FORTE	OB	7	2	1.292	prairie	route		oui	oui	100	discontinue	oui	non	oui	oui	non	oui	1	1
ML10	alignement	2	7	0.5	1	3	PER	14.4	MOYENNE	PAR	2	0	0.72	chemin	zone humide		oui	oui	100	discontinue	oui	oui	non	non	non	oui	0	0
ML12	alignement	2	10	0.5	1	2	PER	5	MOYENNE	PAR	0	0	3.233	prairie	connecte a une autre haie		oui	oui	100	continue	oui	oui	oui	non	non	oui	0	0
ML13	haute	3	7	8	4	10	PER	25.25	FORTE	OB	7	7	0	habitation	route		oui	oui	100	continue	oui	non	non	non	non	non	0	0
ML14	haute	4	10	8	4	8	PER	21.375	FORTE	PAR	4	3	0.64	prairie	route		oui	oui	80	continue	oui	oui	oui	oui	non	non	3	0
ML15	basse	2	2	2	3	2	OB	17.3	MOYENNE	OB	2	2	0	prairie			oui	oui	100	continue	oui	non	non	oui	/	/	0	0
ML16	ponctuee	3	5	2	3	3	PER	14.75	MOYENNE	OB	2	2	1.328	prairie			non	oui	100	discontinue	non	non	non	non	non	oui	0	0
ML18	ponctuee	3	4	0.5	2	4	PER	3.1	MOYENNE	PAR	3	2	0	prairie	chemin		oui	oui	100	discontinue	oui	oui	non	non	non	non	0	0
ML19	ponctuee	3	5	3.5	2	6	OB	7.083333	MOYENNE	OB	4	4	9.596	prairie			non	oui	100	discontinue	oui	non	oui	non	non	oui	0	0
ML20	basse	2	2	0.5	3	6	PAR	5	MOYENNE	PAR	4	4	0	cours d'eau	prairie	route	oui	oui	70	discontinue	oui	oui	non	non	non	oui	3	0
ML21	alignement	2	2.5	0.5	1	1	OB	20	MOYENNE	PAR	0	0	0	prairie			non	oui	100	continue	oui	non	oui	non	non	non	0	0
ML22	alignement	2	15	2	2	1	PER	10	MOYENNE	OB	0	0	2.72	habitation	route		non	oui	100	continue	non	non	non	non	non	oui	0	0
ML23	ponctuee	3	7	5	3	4	OB	5	MOYENNE	PER	1	0	0	habitation	prairie	route	non	oui	100	continue	oui	non	non	oui	non	oui	0	0
ML24	ponctuee	3	5	1	3	8	PAR	14.64	MOYENNE	PER	5	4	0.053	prairie	chemin		non	oui	100	continue	non	non	non	non	non	oui	0	0
ML25	basse	2	2.5	1.5	4	4	PER	1.5	FAIBLE	OB	4	3	0	prairie	route		oui	oui	100	discontinue	oui	oui	non	oui	non	oui	1	0
ML26	basse	2	2	2	1	5	OB	1.666667	FAIBLE	PER	3	3	0	culture			non	oui	100	discontinue	oui	non	oui	oui	non	oui	0	1
ML27	basse	2	2	1.5	4	4	OB	7.454545	MOYENNE	OB	4	3	0	prairie	route		non	oui	100	discontinue	non	non	non	non	non	oui	1	0
ML28	basse	2	2	1	3	9	OB	6.857143	MOYENNE	PER	8	5	0	prairie	route		non	oui	100	continue	oui	non	oui	oui	non	oui	0	0
ML29	basse	3	2.5	2	4	4	OB	7.421053	MOYENNE	PAR	2	2	0	prairie	connecte a une autre haie	chemin	non	oui	100	continue	oui	oui	oui	oui	non	oui	1	0
ML30	basse	2	1.5	1	3	2	PER	23.666667	FORTE	PER	2	2	0	prairie	route		oui	oui	100	continue	oui	non	non	non	non	oui	1	0
ML31	haute	4	10	3	1	7	PAR	25.714286	FORTE	OB	5	4	10.79	prairie			oui	oui	100	continue	oui	oui	oui	oui	non	oui	1	1
ML32	alignement	3	13	2	1	3	PER	10.8	MOYENNE	PER	2	1	27.38	prairie	chemin		oui	oui	100	discontinue	oui	oui	non	non	oui	non	3	0
ML33	ponctuee	3	15	2	1	4	OB	4.272727	MOYENNE	PER	3	3	12.702	prairie	chemin		oui	oui	100	continue	oui	non	non	non	non	oui	1	0
ML34	haute	4	8	3.5	4	11	PAR	9.571429	MOYENNE	PER	6	5	1.732	prairie	cours d'eau		oui	oui	100	discontinue	oui	oui	non	non	non	oui	1	1
ML36	alignement	2	12	0.5	1	1	PER	21.833333	FORTE	PAR	0	0	2.968	prairie	prairie		oui	oui	100	discontinue	oui	oui	non	non	non	oui	2	1
ML37	ponctuee	3	7	2	4	11	PAR	4	MOYENNE	PAR	7	4	0.799	prairie	chemin		oui	oui	100	continue	oui	non	non	non	non	non	0	0
ML39	alignement	2	12	0.5	3	1	PER	21.3	FORTE	OB	0	0	11.561	prairie			non	oui	100	discontinue	non	non	non	non	non	oui	0	0
ML40	alignement	2	10	1	1	5	PER	17.25	MOYENNE	PAR	2	0	3.293	prairie	chemin		oui	oui	40	continue	oui	non	oui	non	oui	oui	0	0
ST01	haute	3	14	4	4	8	OB	14.857143	MOYENNE	OB	5	3	0	prairie	route		oui	oui	100	continue	oui	non	oui	non	non	oui	1	0
ST02	basse	2	3.5	1	4	6	PAR	6.571429	MOYENNE	OB	5	2	0	prairie	habitation		non	oui	100	discontinue	non	non	oui	non	non	/	0	0
ST03	haute	3	7	4	2	13	OB	8	MOYENNE	PAR	10	8	0	prairie			non	oui	80	discontinue	non	non	non	non	oui	/	0	0
ST04	haute	2	14	4	2	6	PER	6.142857	MOYENNE	PAR	4	4	0	prairie			oui	oui	100	continue	non	oui	oui	non	oui	/	0	0
ST05	alignement	1	10	0.5	1	2	PAR	1.5	FAIBLE	PER	0	0	0	prairie			oui	oui	80	discontinue	non	oui	non	non	oui	/	0	0
ST06	basse	1	2.5	1	2	9	OB	21.875	FORTE	OB	5	4	0	prairie	chemin		non	non	0	discontinue	non	non	non	non	non	/	0	0
ST07	haute	4	10	5	2	11	PER	18.083333	MOYENNE	PAR	9	7	0	prairie	culture		oui	oui	100	discontinue	non	oui	non	non	non	/	0	0
ST08	basse	2	6	2	4	5	PAR	14.75	MOYENNE	PER	4	3	0	prairie	chemin		oui	oui	100	continue	oui	oui	oui	non	non	/	0	0
ST09	ponctuee	3	7	5	2	10	OB	21.4	FORTE	PAR	10	6	0	forêt	prairie		oui	oui	100	continue	oui	oui	oui	non	non	/	0	0
ST10	alignement	2	13	8	4	5	PER	3.916667	MOYENNE	OB	2	1	0	culture	prairie		oui	oui	100	continue	non	non	oui	non	oui	/	0	0
ST11	haute	4	30	4	1	5	PER	3.25	MOYENNE	OB	3	2	15.315	prairie	cours d'eau	connecte a une autre haie	oui	non	0	continue	oui	non	non	oui	non	/	0	1
ST12	haute	4	15	6	3	10	PAR	8.777778	MOYENNE	PER	8	4	1.568	prairie	chemin	habitation	oui	oui	100	continue	non	non	oui	non	non	non	2	0
ST13	ponctuee	4	7	1.5	4	10	PAR	6.571429	MOYENNE	OB	6	5	1.398	prairie	cours d'eau	route	oui	oui	100	continue	oui	non	non	non	non	non	1	0
ST14	basse	3	3	2.5	4	5	PER	9.666667	MOYENNE	PAR	4	2	0	prairie	chemin	connecte a une autre haie	oui	oui	80	continue	oui	non	oui	oui	non	non	2	0
ST15	ponctuee	3	2	2	2	9	PAR	19.5	MOYENNE	OB	7	5	6.327	culture	chemin		non	oui	100	continue	oui	oui	oui	non	oui	non	2	0
ST16	basse	2	2.5	1.5	3	9	OB	17.666667	MOYENNE	OB	8	6	0	culture	chemin		oui	oui	100	continue	oui	oui	oui	non	oui	oui	0	0
ST17	ponctuee	4	2.5	4	4	10	OB	17.9	MOYENNE	PER	7	6	0.298	chemin	prairie		non	oui	100	continue	oui	oui	oui	non	oui	non	1	0
ST18	basse	2	2	4	4	6	PER	24.3	FORTE	PER	6	3	0	prairie	chemin		oui	oui	100	continue	oui	oui	non	non	oui	non	2	0
ST19	basse	2	2	2	4	7	OB	14.45	MOYENNE	OB	6	6	0	prairie	route		non	oui	100	continue	non	oui	oui	non	non	oui	0	0
ST20	ponctuee	3	3	4	2	10	PAR	3.333333	MOYENNE	PER	8	6	0.026	prairie	chemin		non	oui	100	continue	oui	oui	oui	oui	non	oui	1	0
ST21	haute	4	10	10	4	12	PAR	2.666667	FAIBLE	PAR	10	7	1.73	prairie	chemin		oui	oui	75	continue	oui	oui	oui	non	non	oui	2	0
ST22	basse	2	2	1.5	1	4	OB	3.25	MOYENNE	PER	2	2	0	prairie	chemin		oui	oui	100	continue	non	oui	non	non	oui	non	3	0
ST23	haute	4	10	3	3	7	OB	13.222222	MOYENNE	PER	5	4	8.792	prairie	chemin		non	oui	100	continue	non	non	non	non	non	non	1	1
ST24	alignement	2	10	2	1	2	OB	13	MOYENNE	PER	1	1	1.143	prairie			oui	oui	100	continue	oui	non	oui	non	non	oui	3	0
ST25	alignement	2	15	1	1	6	PAR	5.25	MOYENNE	OB	3	2	2.56	prairie	route		oui	oui	100	continue	non	non	oui	non	non	non	0	0
ST26	ponctuee	3	8	4	2	9	OB	15	MOYENNE	PER	6	5	0.213	prairie			oui	oui	100	discontinue	oui	non	oui	oui	non	non	0	0
ST27	alignement	2	3	1	1	6	OB	16.8	MOYENNE	PAR	5	4	0.132	prairie			oui	oui	100	discontinue	oui	oui	oui	non	non	non	2	0
ST28	ponctuee	3	5	4	3	4	OB	4.6	MOYENNE	OB	3	4	1.428	prairie			non	oui	100	continue	oui	oui	non	non	non	oui	0	0
ST29	ponctuee	4	5	6	4	8	PER	12.333333	MOYENNE	PAR	6	6	1.907	culture	chemin		oui	oui	100	continue	non	non	non	non	non	non	1	1
ST31	alignement	3	8	3	2	4	OB	5.5	MOYENNE	PER	3	4	0.187	prairie	chemin		oui	oui	100	discontinue	non	oui	oui	non	oui	non	3	0
ST32	alignement	3	6	3	1	2	PER	6.75	MOYENNE	PAR	1	2	0.324	culture	chemin		oui	oui	100	discontinue	oui	non	oui	oui	non	non	0	0
ST33	alignement	3	4	2	1	4	OB	5.444444	MOYENNE	PER	3	4	0.325	culture	chemin		oui	oui	100	discontinue	non	non	oui	non	non	non	0	0
VM01	basse	2	2.5	2.5	4	7	PER	14.125	MOYENNE	PAR	5	4	0	culture			oui	oui	100	continue	non	non	oui	non	non	non	2	0
VM02	ponctuee	3	2.5	3	4	7	OB	9.090909	MOYENNE	PAR	5	4	0.194	culture	chemin		oui	oui	100	continue	oui	oui	oui	non	non	/	0	0
VM03	haute	3	7	5	3	6	OB	19.5	MOYENNE	OB	6	6	1.056	culture	chemin		oui	oui	80	continue	oui	oui	non	non	non	/	0	0
VM04	alignement	3	7	8	2	8	PER	14	MOYENNE	PAR	8	7	3.018	culture	habitation	route	oui	oui	100	continue	non	non	non	non	non	/	0	0
VM05	haute	3	7	4	2	12	PER	14.833333	MOYENNE	PER	5	5	1.251	prairie	chemin		oui	oui	100	discontinue	non	oui	oui	non	non	non	0	0
VM06	haute	4	5	7	4	7	PER	11	MOYENNE	OB	3	1	0.811	habitation	cours d'eau		oui	oui	100	continue	oui	oui	non	non	non	oui	0	0
VM07	haute	7	12	1	1	7	OB	1.5	FAIBLE	OB	4	4	3.15	prairie			oui	oui	80	discontinue	oui	non	non	oui	non	non	0	0
VM08	basse	2	2.5	2	2	4	PER	16.333333	MOYENNE	OB	5	4	0	habitation	prairie		non	oui	100	discontinue	non	oui	oui	non	oui	non	0	0
VM09	ponctuee	3	4	2.5	4	9	OB	24.722222	FORTE	PER	7	5	6.584	culture			oui	oui	100	continue	oui	oui	oui	non	oui	non	0	0
VM10	haute	4	5	4	3	11	PER	24	FORTE	OB	8	4	0	champs	chemin		oui	oui	100	continue	oui	oui	oui	non	non	/	0	1
VM11	alignement	3	10	1	1	4	PAR	19.375	MOYENNE	PER	4	4	0.345	culture	connecte a une autre haie		oui	oui	100	continue	oui	non	oui	non	non	non	0	0
VM12	ponctuee	3	6.5	5.5	4	6	PER	4.285714	MOYENNE	PAR	4	5	2.679	culture			oui	oui	100	discontinue	oui	non	oui	non	non	non	0	0
VM13	alignement	2	7	0.4	1	1	OB	17.5	MOYENNE	PAR	0	1	0.345	cultures	connecte a une autre haie		oui	oui	100	continue	oui	oui	non	non	non	non	0	0
VM14	alignement	2	4	5	2	1	PER	14.153846	MOYENNE	OB	2	1	2.336	prairie			oui	oui	100	continue	oui	non	non	non	non	non	0	0
VM16	alignement	2	7	0.5	1	2	PER	5.083333	MOYENNE	OB	0	0	2.01	habitation	prairie	route	oui	oui	90	continue	oui	oui	non	non	non	non	3	0
VM17	alignement	3	20	2	1	9	PER	4.043478	MOYENNE	PER	5	5	1.82	chemin	prairie		non	oui	50	continue	oui	non	oui	non	non	non	0	0
VM18	alignement	2	5	5	2	1	OB	1	FAIBLE	OB	0	1	8.55	prairie	cours d'eau	route	non	oui	100	continue	oui	oui	oui	non	oui	non	0	0
VM19	alignement	2	15	1	1	1	PAR	11.75	MOYENNE	PER	0	1	0.219	culture	prairie		oui	oui	50	discontinue	oui	non	non	non	non	non	0	0
VM20	haute	4	5	2.5	4	12	OB	10.333333	MOYENNE	OB	9	7	0.271	prairie	chemin		non	oui	100	continue	oui	non	non	non	non	non	0	0
VM21	ponctuee	3	7	2	3	6	PER	21.714286	FORTE	PER	6	5	0.351	prairie	chemin		oui	oui	100	continue	non	oui	oui	non	non	oui	3	0
VM22	basse	2	2	1.5	3	4	PAR	17	MOYENNE	PAR	4	3	1.091	habitation	chemin		oui	oui	90	continue	oui	oui	non	non	non	oui	0	0
VM23	basse	2	2	2	4	7	PER	26.6	FORTE	PER	6	5	0	prairie	chemin		non	oui	100	continue	oui	oui	non	non	non	oui	0	0
VM24	haute	4	7	7.5	4	10	PAR	26.166667	FORTE	OB	8	8	1.615	culture			non	oui	100	continue	non	oui	oui	non	non	non	1	0
VM25	haute	4	20	4.5	3	11	PER	2.764706	FAIBLE	PER	7	3	4.065	chemin	cours d'eau		oui	oui	100	continue	non	oui	non	non	non	non	1	1
VM26	basse	2	2.5	1.5	3	6	OB	10.75	MOYENNE	PER	5	4	0	culture	chemin		oui	oui	100	continue	oui	non	oui	oui	non	non	3	0
VM27	basse	2	2.5	3.5	3	7	OB	22.038462	FORTE	OB	6	5	0	culture			non	oui	100	continue	oui	non	oui	non	non	non	0	0
VM28	ponctuee	3	3	8	2	5	OB	6	MOYENNE	OB	5	2	0	culture			non	oui	100	continue	oui	oui	oui	non	non	non	1	0
VM29	basse	2	0.5	1	1	2	PAR	5.5	MOYENNE	OB	2	2	0	culture	chemin		oui	oui	100	discontinue	non	oui	non	non	non	non	0	0
VM30	basse	3	2.5	4.5	1	8	PER	10.625	MOYENNE	OB	6	5	0	culture	chemin		non	oui	100	continue	non	oui	non	non	non	non	0	0
VM31	ponctuee	3	3	2	3	7	OB	15.833333	MOYENNE	PER	6	6	0	prairie			non	oui	100	discontinue	oui	non	oui	non	oui	non	0	0
VM32	ponctuee	3	4	2	3	9	OB	14.111111	MOYENNE	OB	7	6	0	chemin			oui	oui	100	continue	oui	oui	oui	non	non	non	1	0
VM33	ponctuee	3	2.5	3	2	8	OB	22.5	FORTE	PER	5	3	0	culture			oui	oui	100	continue	oui	non	oui	non	non	non	0	0
								#NAME?

## Sheet: Feuil2
LS01	LS01	orme : 15; peuplier 1 m	oui
LS02	LS02	erable : 40 ; 60; 40; 40 ; peuplier: 10	oui
LS03	LS03	8 frenes : 60; 60; 50*4; 40; 90; 7 ormes: 10-15	oui
LS04	LS04	/	non
LS05	LS05	20-50	oui
LS06	LS06	/	non
LS07	LS07	1 erable: 30-40 cm; 1 frêne : 15 cm	oui
LS08	LS08	4 frênes: 10-15; 2 noyers: 30	oui
LS09	LS09	abs	non
LS10	LS10	1 frêne : 10cm, noyer 30cm	non
LS11	LS11	2 orme: 10-15	non
LS12	LS12	7 resineux: 35+4, 20, 40*2; 1 noyer: 70	oui
LS13	LS13	/	non
LS14	LS14	/	non
LS15	LS15	bcp noyer: 40-50	oui
LS16	LS16	bcp noyer: 40-50	oui
LS17	LS17	1 noyer: 50, 6 noyer: 40; 1 prunier: 30	oui
LS18	LS18	4 peuplier: 40; 2 peuplier: 50; 3 peuplier: 30	oui
LS19	LS19	/	non
LS20	LS20	/	non
LS21	LS21	1 frene: 20	non
LS22	LS22	12 noyers: 20	oui
LS23	LS23	/	non
LS24	LS24	3 noyers: 40; 1 noyer: 50	oui
LS25	LS25	/	non
LS26	LS26	/	non
LS27	LS27	/	non
LS28	LS28	/	non
LS29	LS29	3 frene: 30; 1 chene: 40	oui
LS30	LS30	/	non
LS31	LS31	/	non
LS32	LS32	2 peupliers: 50-40; 1 saule: 1m50	oui
ML02	ML02	saule: 70; chene: 40, 30*3	oui
ML03	ML03	chene: 30, 20, 20, 3*30, 1m, 4*30-50, 4*30; frene : 4*15-20; merisier: 6*15	oui
ML04	ML04	5 aulnes: 30; 6 chenes: 40; 2 frenes: 10-15	oui
ML05	ML05	frene: 10, 10-15 aulnes: 20-30	non
ML07	ML07	2 frenes avec plusieurs troncs: 10-15; 6 chenes: 20-30; 1 bouleau:20	non
ML10	ML10	9 cupressus: 20	oui
ML12	ML12	6 chenes: 30-40; 1 frene: 20	oui
ML13	ML13	/	non
ML14	ML14	bcp de charme et erable: env 10 cm	non
ML15	ML15	/	oui
ML16	ML16	chene: 60, 20, 20, 20	oui
ML18	ML18	/	non
ML19	ML19	chenes: 4*60	oui
ML20	ML20	/	non
ML21	ML21	/	non
ML22	ML22	17 resineux: 15-20	non
ML23	ML23	/	oui
ML24	ML24	chene: 10-15; 2 peupliers: 10-15	non
ML25	ML25	/	non
ML26	ML26	/	non
ML27	ML27	/	non
ML28	ML28	/	non
ML29	ML29	/	non
ML30	ML30	/	non
ML31	ML31	chene: 10*30-60; 3*15-20, 25	oui
ML32	ML32	70*2, 35, 40, 80, 20, 15, 40, 70, 45, 35, 1m20	oui
ML33	ML33	6 chenes P: 70*3; 40*2; 75*1	oui
ML34	ML34	5 peupliers: 30, 30, 30, 20, 30; chene: 15; 3 resineux: 20	oui
ML36	ML36	chene : 40*4	oui
ML37	ML37	1 peuplier: 40; 1 saule: 40	oui
ML39	ML39	chene: 3*50, 2*30, 3*40, 1*20, 2*60	oui
ML40	ML40	1 peuplier: 40; 2 frene: 30; 8 erables: 20*5, 30, 50, 40	oui
ST01	ST01	/	non
ST02	ST02	/	non
ST03	ST03	/	non
ST04	ST04	/	non
ST05	ST05	/	non
ST06	ST06	/	non
ST07	ST07	/	non
ST08	ST08	/	non
ST09	ST09	/	non
ST10	ST10	/	non
ST11	ST11	5 frenes: 20 et 30; 10aine de chenes: 40	oui
ST12	ST12	chene: 40-30*2 et 20*4	oui
ST13	ST13	1 noyer: 40; 1 chene : 35, 1 chene: 20 et peuplier: 30	oui
ST14	ST14	/	non
ST15	ST15	1 noyer: 1m; 4 frenes: 20	oui
ST16	ST16	/	non
ST17	ST17	2 noyers: 15-20; 1 frene: 20	non
ST18	ST18	/	non
ST19	ST19	/	non
ST20	ST20	1 frene: 15	non
ST21	ST21	chene: 2*30, 1*20, 2*15, 1*35	oui
ST22	ST22	/	non
ST23	ST23	chene: 1*60, 1*10, 1*15, 2*50, 1*1m, 1*40, 1*20	oui
ST24	ST24	3 chenes avec 9 troncs: 20	oui
ST25	ST25	peuplier: 40, 60, 40, 40	oui
ST26	ST26	chene: 30, 15; frene: 15; noyer: 15	oui
ST27	ST27	6 chenes P: 10	non
ST28	ST28	noyer: 40, 30, 15, 20,20,30,20	oui
ST29	ST29	frene: 30; merisier: 10; noyer: 15, 50, 35, 30	oui
ST31	ST31	2*30, 1*30, 2*15	oui
ST32	ST32	noyer avec plusieurs troncs: 20,15, 15,15,15,15	oui
ST33	ST33	noyer: 3*10, 20, 20	oui
VM01	VM01	absence	non
VM02	VM02	merisier: 50	oui
VM03	VM03	noyer: 50cm	oui
VM04	VM04	merisier: 30; 4 noyer: 40; saule: 15	oui
VM05	VM05	3 frene: 15; +ieurs noyer: 20cm	non
VM06	VM06	1 frene: 15; 1 noye: 40	oui
VM07	VM07	1 saule: 60-70; 4 aulnes: 20-30, 7 aulnes: 15; 2 frenes: 30-40	oui
VM08	VM08	/	non
VM09	VM09	+eurs cole frene: 1 ; 3 noyer; 1 erable: 4	oui
VM10	VM10	1 frene: 30 ; 2 orme: 10	oui
VM11	VM11	3 noyers: 50; 40; 40	oui
VM12	VM12	1 noyer: 30	oui
VM13	VM13	5 noyers: 30; 1 noyer: 40; 1 noyer: 15; 1 noyer: 20	oui
VM14	VM14	15 pommiers: 30	oui
VM16	VM16	5 erables negender: 20-30 et 5 myrobolan 20-30	oui
VM17	VM17	19 peupliers: 30	oui
VM18	VM18	2 pommiers: 20; 1 pommier: 15	non
VM19	VM19	3 peupliers: 15; 2 peupliers: 10	non
VM20	VM20	1 noyer: 20*3	non
VM21	VM21	3 noyers : 20; 1 noyer: 40	oui
VM22	VM22	/	non
VM23	VM23	/	non
VM24	VM24	2 merisier: 40, 30, 20; 1 noyer: 40	oui
VM25	VM25	frene: 50, 20, 50, 10, 15, 20; aulne: 20, 15, 10, 10, 10, 35, 20, 20, 30	oui
VM26	VM26	/	non
VM27	VM27	/	non
VM28	VM28	/	non
VM29	VM29	/	non
VM30	VM30	/	non
VM31	VM31	/	non
VM32	VM32	/	non
VM33	VM33	/	non
