# Supplementary material for: Integrating adaptation pathways and Ostrom’s framework for sustainable governance of social-ecological systems in a changing world
Source: PeerJ journal article supplement (doi:10.7717/peerj.18938), 2025-02-24
Supplement: FileS4.zip [file dyn_hedges_full_scen_3.pdf › PACSEN-main/figures/figures_annexe/dyn_hedges_full_scen_3.pdf]

Climatic stress

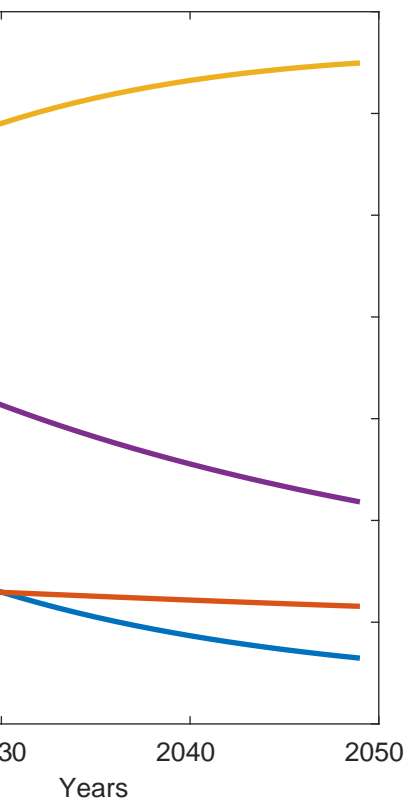

Climatic stress level 1

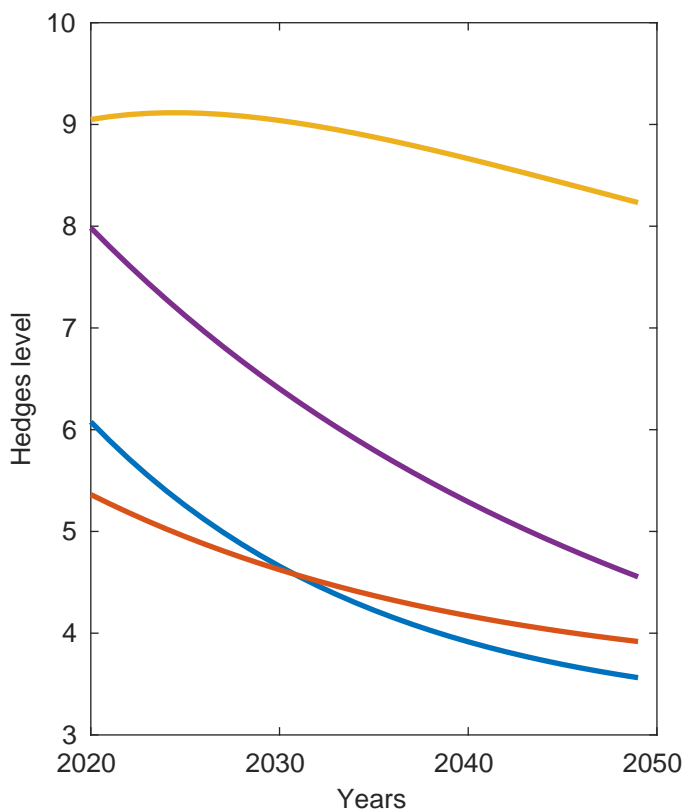

Climatic stress

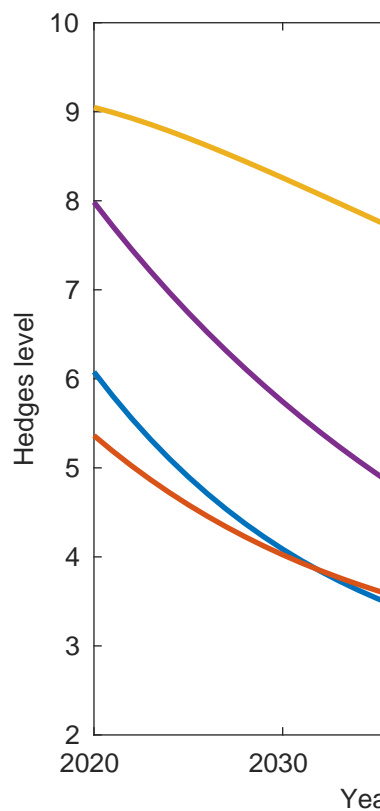

Small low-div. hedges Small div. hedges Tall low-div. hedges Tall div. hedges
