# Supplementary material for: Integrating adaptation pathways and Ostrom’s framework for sustainable governance of social-ecological systems in a changing world
Source: PeerJ journal article supplement (doi:10.7717/peerj.18938), 2025-02-24
Supplement: FileS4.zip [file haies_ls_2000_2019.xlsx]

## Sheet: Feuille1
fid	Type_haie	Longueur	join_fid	join_Type_	join_Longu	distance
1	ponctuee	204.7327657992108	1	haute	232.98802944707467	0
2	ponctuee	598.6787658980277	3	ponctuee	607.0028165985584	0
3	alignement	61.55079902475661	4	ponctuee	63.01868100719713	0.081726507122037
4	alignement	55.818208606528984	0	vide	55.818208606528984	10.001924373468352
5	ponctuee	59.2526139399201	0	vide	59.2526139399201	2.418287584721738
6	basse	62.22226710573968	0	vide	62.22226710573968	5.416785000759984
7	ponctuee	109.32228742473612	2	ponctuee	230.92070034134017	0
8	haute	47.29588039724795	5	haute	34.23874532237083	0
9	ponctuee	67.50551322584629	0	vide	67.50551322584629	93.53776384049934
10	basse	75.64165629949501	16	basse	23.488357271542323	0.977616972027477
11	basse	29.333164980690714	6	ponctuee	26.439655526446042	2.007437326963466
12	basse	96.00033636491082	202	ponctuee	71.12296324331001	0.966322415926166
13	haute	143.49895462106926	7	haute	205.8103973221279	0
14	haute	84.8923581248387	220	basse	64.8347046499983	0.367318430796761
15	haute	93.67359573469932	13	haute	111.43892900482263	2.346987807943917
16	ponctuee	29.618366125899936	15	ponctuee	31.876386014329483	1.406986956402185
17	basse	117.7198212501395	9	basse	98.55429910583688	0
18	ponctuee	75.42843886688057	10	ponctuee	76.8957669909615	0
19	alignement	58.39406641064486	0	vide	58.39406641064486	14.549949756938389
20	haute	49.80444488146727	11	haute	55.33296567226965	0.816054779723727
21	haute	43.31409513513755	12	haute	50.170024032067445	0
22	haute	102.36588447490838	14	haute	102.2178792869709	0
23	basse	82.09747994298118	19	basse	72.0313046072778	1.360702363433866
24	ponctuee	201.56174023358957	20	ponctuee	206.4196308436657	0
25	ponctuee	226.74716463753376	181	ponctuee	225.57282721121916	0
26	basse	63.58596596849684	203	basse	49.40330938692977	1.227631241777955
27	ponctuee	42.220884723494756	221	ponctuee	41.30357831048426	0
28	alignement	134.92964146886476	26	alignement	139.90916595018487	0
29	alignement	157.89247864743004	25	alignement	164.41305156693824	0
30	haute	205.77942360058267	24	haute	205.41155657266057	0
31	ponctuee	155.08631358668742	23	ponctuee	121.71911100565421	0
32	haute	128.12001884175405	22	haute	133.15689249774056	0
33	haute	111.8281213414424	21	haute	102.90670884279706	0
34	ponctuee	85.40548435853292	0	vide	85.40548435853292	5.830609508190528
35	ponctuee	44.6260637095631	94	ponctuee	48.91885647307252	0.812018182309053
36	ponctuee	110.65828879679881	27	basse	25.334256093012012	2.787284366451473
37	alignement	48.30227156311951	134	alignement	49.85303651292359	1.192010199013107
38	basse	39.90818593419291	92	ponctuee	58.63570088067816	0
39	alignement	104.63566272628174	108	alignement	107.95752133483693	0.210161042652316
40	alignement	101.94072403033529	109	alignement	102.38327999252307	1.123809640083979
41	basse	132.07542754659494	31	ponctuee	31.26596121245449	0.38534168009286
42	ponctuee	95.90548614119078	28	ponctuee	84.62159628048246	0.999479331610069
43	alignement	41.07038299305471	36	alignement	41.837899448722766	0.623487836048857
44	alignement	318.9061853761781	37	alignement	229.17663807785087	0
45	ponctuee	123.30734474467314	127	ponctuee	82.44633994929474	0
46	alignement	33.64556372289377	40	alignement	34.01047289471183	3.155494168316084
47	alignement	27.998619658764166	41	alignement	22.137192260893904	2.087220369974353
48	alignement	24.911843271403058	34	alignement	24.46802060723129	0.146967411311499
49	basse	106.36877568117622	33	basse	115.45471929204749	0
50	basse	93.17189115390265	32	haute	82.86389429852842	0
51	ponctuee	57.39118594842656	150	basse	25.603032792763294	1.834494872819893
52	basse	13.805993796459399	163	basse	19.733839198115245	0.366366449670437
53	alignement	53.24843347377134	129	alignement	54.7721457234549	2.279505274543216
54	alignement	47.57596284923447	91	alignement	55.39542156708102	0.642961638367425
55	ponctuee	81.69059045033822	107	basse	86.9211641484737	0
56	haute	44.573350777609704	116	haute	40.63521120312636	0
57	haute	123.13074924710466	117	haute	50.88178813618191	0.632156150368525
58	alignement	49.919572959747384	88	alignement	51.394140556188965	0
59	alignement	41.582712974618325	89	alignement	60.036426142127944	1.119703408780931
60	ponctuee	47.825841891335585	87	haute	51.05298879335544	0
61	basse	58.14065992521341	113	haute	60.61033082506629	0.684520313332534
62	basse	94.143653722414	206	haute	98.16470738412346	0
63	basse	110.65956294616177	115	haute	117.26280751450237	0
64	haute	160.38102591529162	85	haute	160.2865225216055	0
65	ponctuee	70.83049868487515	82	haute	75.76318981443231	0.742063225203213
66	basse	75.40926712607076	84	ponctuee	43.82121884089176	1.159163962717335
67	ponctuee	47.311080875017744	216	ponctuee	51.829690874310536	0.735416481798
68	ponctuee	92.76574031957122	225	ponctuee	45.9320192778788	14.303951917252503
69	haute	211.68786142014437	103	haute	213.52027655858066	0.088650071344437
70	haute	27.60950157218908	102	haute	24.316985020097235	0.640366482138061
71	basse	17.669435719141923	101	basse	26.802936089329705	0.850636788854767
72	haute	148.32056546447598	100	haute	146.7449321674452	0
73	ponctuee	73.49892363270101	106	ponctuee	67.0581709478223	0
74	haute	76.91599700583859	105	haute	86.20455274140656	0
75	haute	73.80244905412722	183	haute	70.22342885773759	0.647328252519442
76	alignement	317.10176271857125	64	alignement	322.9659154251328	0
77	alignement	249.01519548245935	65	alignement	245.42200003028188	0
78	alignement	209.5908952831549	66	alignement	200.26607520412858	0.74578126302689
79	alignement	41.62223634243763	68	alignement	39.7048812764776	0.306664440190224
80	ponctuee	127.95816241242412	73	ponctuee	132.40765700165642	0
81	alignement	152.0693622496316	70	alignement	79.83364406411306	0
82	alignement	54.589400565742125	71	alignement	53.98333445762624	0
83	alignement	68.66535651342204	74	alignement	67.60548150521312	0
84	ponctuee	111.97811069249374	75	haute	121.43546366719688	0.88571455128566
85	alignement	65.59376763917268	188	alignement	60.839237869711496	0
86	alignement	105.50265055561242	79	alignement	110.15650554697895	0.950698578630475
87	alignement	61.88902581435739	78	alignement	64.0518193832238	0
88	ponctuee	114.43243577648815	69	ponctuee	109.58905811424694	0.253644071090428
89	basse	72.02811761138183	0	vide	72.02811761138183	126.62963656950718
90	basse	45.09243147750524	59	haute	57.49372071805702	2.314993186587727
91	haute	44.752376668029825	204	haute	46.13229852119332	1.19642102960012
92	alignement	174.12924081247604	58	alignement	129.71145112235178	0
93	haute	173.5378700016836	29	haute	165.97855137394924	0
94	haute	70.75251222776974	51	haute	84.43029198395121	0
95	ponctuee	94.2461744044063	53	ponctuee	93.07915431786759	0.813475160108956
96	ponctuee	195.65504424871511	223	basse	67.94670906959541	0.151314738796886
97	ponctuee	61.28828752416376	205	basse	20.225355243300587	0.211412386367043
98	ponctuee	56.467774792633406	52	ponctuee	59.56743593538399	0.553620551582378
99	alignement	53.98209870121402	54	alignement	55.89447921053314	0
100	haute	68.1001308895474	0	vide	68.1001308895474	10.903563801410334
101	haute	120.79630323095137	63	haute	116.83480881799989	0
102	haute	95.24944411837271	111	haute	95.70443872620865	1.611014102068046
103	alignement	133.30605332433333	55	alignement	136.57709058925872	1.407700411682742
104	basse	40.62234262522854	56	haute	42.35064469468763	0.831445761898263
105	alignement	92.35912770890225	189	alignement	94.70918583590685	0
106	alignement	50.81844122809585	208	alignement	54.69715423593188	0.163403287293097
107	alignement	81.08535445874084	97	alignement	48.7088453324346	1.638212502657401
108	alignement	47.010394343416344	0	vide	47.010394343416344	20.599499231661294
109	basse	133.38430865692058	47	ponctuee	120.68163835897573	0.292880257308047
110	basse	20.3399958970558	49	haute	22.042076104358365	0
111	haute	115.30808184103805	45	haute	59.944939554268004	1.845279484866655
112	alignement	22.315111191649574	38	alignement	35.13805106711285	5.147534755395555
113	alignement	59.00626581270116	131	alignement	261.5203699403527	1.798360379448062
114	ponctuee	273.80259264967054	118	ponctuee	269.2807354337333	0
115	alignement	54.3213741715815	224	haute	67.40398991431324	0
116	haute	515.8243959074393	119	haute	529.7110311790335	0
117	ponctuee	47.7335996348037	186	haute	56.72035608413517	0.356946536574991
118	alignement	60.09636643602273	124	alignement	58.98778542493264	1.963042628560346
119	alignement	276.92139902539634	147	alignement	275.4852428856877	0.320890881652319
120	basse	57.48743352925467	151	haute	69.20948230233289	0
121	basse	31.343749225597513	152	ponctuee	31.091424670218142	0
122	ponctuee	148.83657322053452	168	haute	127.26669003606067	1.253267597037916
123	haute	97.49971766755179	201	haute	91.20413110292547	0.24407076505721
124	basse	79.93817535609516	155	ponctuee	59.26744809607611	0.798261272659121
125	basse	20.342048313261117	120	haute	50.26855941375826	0
126	basse	18.293716658043028	148	ponctuee	95.44678456470187	1.384832001808324
127	basse	187.076975538231	226	ponctuee	25.946942466510134	2.197671616179903
128	ponctuee	66.80674326720295	0	vide	66.80674326720295	33.4850524176022
129	basse	64.50122063550921	210	ponctuee	100.17462056733953	0
130	basse	65.47295775602927	209	ponctuee	107.95430936339646	0
131	ponctuee	130.93555359633544	156	ponctuee	152.35742360581352	0.257697254526753
132	ponctuee	44.48280116644975	157	ponctuee	47.34112064658911	1.495813051551471
133	alignement	28.42624575635414	146	alignement	31.367009615930527	5.472771085688642
134	alignement	78.38029146732077	144	alignement	81.95192915950948	2.025687559701151
135	alignement	42.836129462032964	145	alignement	44.18066848269996	2.022697476046705
136	alignement	528.0458693677692	135	alignement	536.7511787513582	0
137	alignement	278.3745894310711	136	alignement	282.74896367778257	1.118634612552981
138	alignement	184.8825810024138	137	alignement	163.22313969527718	0.210808706725815
139	alignement	29.51611446569794	133	alignement	28.20793609478908	3.823138134000483
140	alignement	235.70357510167662	132	alignement	236.8302518325955	3.705324905441754
141	alignement	197.1365190155204	143	alignement	198.40710023553396	0
142	alignement	114.76726598664105	142	alignement	77.17480143658587	0.644163798160366
143	alignement	15.14964221368641	195	alignement	16.741432408605807	3.373863315063965
144	basse	229.55325223544583	138	haute	251.15833781523577	0
145	basse	281.8168699362157	139	basse	294.4262147427072	0.46422076259882
146	haute	73.2435801283444	158	haute	66.88971230519331	0.541431682448659
147	haute	257.5952628855374	159	haute	251.2342591806477	0
148	basse	87.0555000734502	0	vide	87.0555000734502	27.079100682652694
149	basse	41.26511024950685	160	ponctuee	33.15780890752426	0.543117183504143
150	alignement	61.66006627268044	193	alignement	64.26891751974384	1.479052682459828
151	alignement	17.345680685800673	192	alignement	21.050739785875113	0.623340578205348
152	alignement	30.152796177256324	191	alignement	21.960256681917937	0.624754096001969
153	basse	221.19968887850487	141	haute	222.79451306932467	0
154	basse	66.57829148863514	140	haute	67.69654270823777	0
155	alignement	24.71277771196634	194	alignement	24.04166748791431	1.36029731496372
156	basse	139.38926889858743	0	vide	139.38926889858743	8.073286126291782
157	basse	132.77499537974342	161	ponctuee	147.4711241147596	0
158	ponctuee	139.5124776948192	211	ponctuee	155.68363113390149	0.255426956565972
159	ponctuee	93.66360064471853	165	ponctuee	89.3154519360711	0
160	ponctuee	63.73621970350695	164	ponctuee	62.57769718563669	0.253823547111806
161	basse	98.37853343092115	166	ponctuee	86.98246033678586	2.003375188745446
162	basse	141.77602730115473	162	ponctuee	140.92376993760917	0
163	basse	40.66481334867119	227	basse	32.69553835274968	3.186333105478894
164	haute	20.08987915246224	177	haute	23.508639410698034	0.374086145849251
165	basse	37.95124317843247	77	basse	59.42433531428901	0.631891971243579
166	alignement	37.99956728243562	0	vide	37.99956728243562	5.001884460714269
167	alignement	56.87095871108338	0	vide	56.87095871108338	65.57243212228147
168	ponctuee	116.21365918575187	167	ponctuee	105.9688630490796	0.403739013509248
169	alignement	37.13144480091443	198	alignement	33.819171279328614	1.340698265688378
170	basse	82.83503613895134	170	ponctuee	62.278398108020085	0.847059955414676
171	ponctuee	35.91168169461341	0	vide	35.91168169461341	55.94795402511721
172	basse	64.70026093282013	185	basse	35.00131705294242	0.639010672356529
173	haute	63.81561881551656	0	vide	63.81561881551656	39.20363535339879
174	ponctuee	75.07182600074177	187	haute	32.90292136641828	0
175	ponctuee	45.0652803485629	0	vide	45.0652803485629	6.584055995961429
176	alignement	38.46236970122908	199	ponctuee	49.13050927820111	0
177	basse	128.0734308237517	0	vide	128.0734308237517	5.170223346489925
178	haute	59.35288712647794	0	vide	59.35288712647794	36.0088360663941
179	haute	91.32531093857558	0	vide	91.32531093857558	2.155314437992804
180	haute	59.54506366662402	126	haute	60.6745691600174	2.724100934413205
181	ponctuee	63.51132759819052	44	ponctuee	70.64281031709862	0
182	basse	95.63674866370562	228	basse	108.89097055973586	95.68847292180448
183	haute	22.522942688557247	200	haute	22.232380669266938	0
184	ponctuee	156.4871519002838	90	ponctuee	155.45782717025983	0.56816630807661
185	haute	43.9931416189892	184	ponctuee	34.04679349082255	0.061571139207151
186	ponctuee	40.84934732200831	182	basse	49.228318144330935	0.149034786372532
187	haute	87.41586943717478	112	haute	98.96522935614855	0.441884209329966
188	basse	20.96328535659522	153	ponctuee	52.11414136012226	0
189	haute	51.51973243446558	212	haute	53.95216843252032	0
190	ponctuee	58.46916420400249	213	ponctuee	54.12040221235122	0
191	ponctuee	61.67647024239132	214	ponctuee	89.6740968387113	0.933428045010343
192	haute	300.89363407116804	215	haute	303.4739810558836	1.225555766443111
193	haute	29.141902503431734	229	ponctuee	32.10085473352147	1.988117895075644
194	haute	42.46836657212856	0	vide	42.46836657212856	3.033252671302724
195	haute	33.69278129977544	218	haute	28.71393861049701	0
196	haute	59.283067734090096	219	haute	97.37220271559865	1.754183117631183
197	basse	10.677592683270735	178	haute	10.676182801626956	0
198	basse	49.63627911706136	0	vide	49.63627911706136	87.97046934494942
199	ponctuee	21.63072558465706	149	ponctuee	97.11761457077195	0
200	alignement	45.92953339716831	114	alignement	48.810247438525735	0
201	ponctuee	30.10128041720922	57	haute	94.99316767615882	0
202	ponctuee	32.46966242369094	125	ponctuee	29.894243051640128	0
203	ponctuee	38.16702858552757	171	ponctuee	35.192398274880524	0
204	basse	56.89485556593378	172	basse	49.396188343617006	0
205	basse	122.0739611551073	230	ponctuee	97.72415556711711	0
206	haute	35.0721848758479	0	vide	35.0721848758479	0
207	vide	74.0673635074674	8	basse	74.0673635074674	0
208	vide	42.508658839600216	17	basse	42.508658839600216	0
209	vide	28.7813836296188	18	basse	28.7813836296188	0
210	vide	81.06683413498152	30	basse	81.06683413498152	0
211	vide	17.213866809841097	35	alignement	17.213866809841097	0
212	vide	48.11559158304953	39	basse	48.11559158304953	0
213	vide	106.93113549039656	42	ponctuee	106.93113549039656	0
214	vide	163.62981962983386	43	ponctuee	163.62981962983386	0
215	vide	104.3251679555848	46	ponctuee	104.3251679555848	0
216	vide	111.12775191633695	48	alignement	111.12775191633695	0
217	vide	36.17625940457282	50	alignement	36.17625940457282	0
218	vide	38.20606854126027	60	basse	38.20606854126027	0
219	vide	10.313950459821887	61	basse	10.313950459821887	0
220	vide	40.885622982045575	62	basse	40.885622982045575	0
221	vide	125.11461497357875	67	haute	125.11461497357875	0
222	vide	31.26153276335242	72	alignement	31.26153276335242	0
223	vide	21.168678144493533	76	basse	21.168678144493533	0
224	vide	74.35318623425351	80	alignement	74.35318623425351	0
225	vide	90.44958307000324	81	alignement	90.44958307000324	0
226	vide	52.076576844868136	83	alignement	52.076576844868136	0
227	vide	87.94763687826728	86	ponctuee	87.94763687826728	0
228	vide	53.161740468712686	93	basse	53.161740468712686	0
229	vide	57.88135877661228	95	basse	57.88135877661228	0
230	vide	87.81142342308699	96	basse	87.81142342308699	0
231	vide	104.70621888771807	98	basse	104.70621888771807	0
232	vide	104.87359684038506	99	basse	104.87359684038506	0
233	vide	30.21639229193589	104	ponctuee	30.21639229193589	0
234	vide	33.381930841869924	110	basse	33.381930841869924	0
235	vide	27.963243327513155	121	ponctuee	27.963243327513155	0
236	vide	59.34003270734243	122	basse	59.34003270734243	0
237	vide	180.2972202678017	123	alignement	180.2972202678017	0
238	vide	62.55240896425426	128	ponctuee	62.55240896425426	0
239	vide	40.96221639716545	130	basse	40.96221639716545	0
240	vide	23.340488046456105	154	haute	23.340488046456105	0
241	vide	86.07697513520077	169	ponctuee	86.07697513520077	0
242	vide	52.65778129375592	173	basse	52.65778129375592	0
243	vide	142.07929626582916	174	basse	142.07929626582916	0
244	vide	40.61009211794745	175	ponctuee	40.61009211794745	0
245	vide	95.10280239680125	176	ponctuee	95.10280239680125	0
246	vide	64.4771310301039	179	basse	64.4771310301039	0
247	vide	24.32930342947556	180	alignement	24.32930342947556	0
248	vide	75.59079684629387	190	basse	75.59079684629387	0
249	vide	26.56037529918777	196	ponctuee	26.56037529918777	0
250	vide	33.43472221625411	197	basse	33.43472221625411	0
251	vide	69.33727143504066	207	basse	69.33727143504066	0
252	vide	30.3132738998991	217	ponctuee	30.3132738998991	0
253	vide	50.82829148520764	222	alignement	50.82829148520764	0
