# Supplementary material for: Integrating adaptation pathways and Ostrom’s framework for sustainable governance of social-ecological systems in a changing world
Source: PeerJ journal article supplement (doi:10.7717/peerj.18938), 2025-02-24
Supplement: FileS4.zip [file La_Sauvetat_Haies_1989_2000_2019_QG.xlsx]

## Sheet: 1989_2000
fid	Type_haie	Longueur	join_fid	join_Type_	join_Longu	distance
1	ponctuee	76.70711352721052	1	ponctuee	204.7327657992108	0
2	ponctuee	35.17897368181227	0	vide	35.17897368181227	13.889219498244103
3	basse	62.54247414121192	6	basse	62.22226710573968	2.575032051977911
4	ponctuee	61.1296129137039	5	ponctuee	59.2526139399201	0.569738805728576
5	alignement	55.04808536672969	4	alignement	55.818208606528984	0.512858043489429
6	ponctuee	205.79897776499467	7	ponctuee	109.32228742473612	0.631594085976727
7	ponctuee	602.7686051556815	2	ponctuee	598.6787658980277	0
8	alignement	64.74520127922585	3	alignement	61.55079902475661	0.637476273474622
9	haute	33.909282028963	8	haute	47.29588039724795	0.846436531730495
10	haute	25.889200466357664	0	vide	25.889200466357664	17.897608919870972
11	basse	25.704426925586834	0	vide	25.704426925586834	40.87018721865899
12	haute	76.07520548165301	14	haute	84.8923581248387	0
13	haute	94.86178703454254	15	haute	93.67359573469932	2.083569456714685
14	basse	66.30937549495047	0	vide	66.30937549495047	27.057397312264715
15	ponctuee	26.519306262918576	16	ponctuee	29.618366125899936	0.590691534592709
16	alignement	60.904082914554856	18	ponctuee	75.42843886688057	0
17	alignement	58.10447330155053	19	alignement	58.39406641064486	0
18	alignement	41.0925295503105	21	haute	43.31409513513755	0.067007683168939
19	alignement	42.31790519682513	20	haute	49.80444488146727	0.021552050001987
20	haute	47.76496621821568	189	haute	51.51973243446558	3.571295426559698
21	ponctuee	89.69883706849981	22	haute	102.36588447490838	0
22	ponctuee	217.30615727578964	25	ponctuee	226.74716463753376	0
23	alignement	83.3368492827008	28	alignement	134.92964146886476	0
24	alignement	151.05270815852543	29	alignement	157.89247864743004	0
25	basse	217.1613596251808	30	haute	205.77942360058267	0.775456444025115
26	ponctuee	80.00372540902455	31	ponctuee	155.08631358668742	0
27	alignement	123.67499010678463	32	haute	128.12001884175405	0.218146232905526
28	ponctuee	92.02984823463171	36	ponctuee	110.65828879679881	0
29	haute	100.52263477742119	33	haute	111.8281213414424	0
30	haute	100.27603676768493	0	vide	100.27603676768493	6.308694759036245
31	haute	46.694649035796985	35	ponctuee	44.6260637095631	0.868786512722737
32	ponctuee	47.43899147352551	190	ponctuee	58.46916420400249	0.193343759270847
33	alignement	58.845176557014995	191	ponctuee	61.67647024239132	1.455835367842985
34	ponctuee	105.32881113667968	41	basse	132.07542754659494	3.761034839135095
35	ponctuee	76.93760647739978	0	vide	76.93760647739978	7.862238238704316
36	alignement	36.2755447722899	0	vide	36.2755447722899	20.51359671958698
37	alignement	63.02717301825346	0	vide	63.02717301825346	32.71648120660282
38	alignement	40.946654001240425	0	vide	40.946654001240425	21.405526161951972
39	alignement	107.83940516604996	39	alignement	104.63566272628174	2.534534880878994
40	alignement	100.84388898889674	40	alignement	101.94072403033529	4.986521771012544
41	basse	45.30506213325178	0	vide	45.30506213325178	38.34169538681549
42	basse	23.79798118715131	0	vide	23.79798118715131	113.80545301113878
43	alignement	32.107342615868546	46	alignement	33.64556372289377	3.867022340724005
44	alignement	27.711946539834774	47	alignement	27.998619658764166	3.450249047261095
45	alignement	23.376232118179058	48	alignement	24.911843271403058	0.296994038425066
46	alignement	319.334027736455	44	alignement	318.9061853761781	1.435305624275949
47	alignement	38.9732593544815	43	alignement	41.07038299305471	1.088182051283857
48	alignement	71.63657263728773	0	vide	71.63657263728773	470.3554255824421
49	alignement	42.731915012881736	37	alignement	48.30227156311951	1.272790031891196
50	basse	72.88647642372005	0	vide	72.88647642372005	106.13423401962345
51	basse	44.74089937419222	26	basse	63.58596596849684	1.578835050168061
52	basse	134.77736514492062	13	haute	143.49895462106926	0.01109863585001
53	alignement	30.978722371474188	139	alignement	29.51611446569794	0.6489709746721
54	alignement	308.59703258441965	140	alignement	235.70357510167662	0
55	ponctuee	204.88142836130595	24	ponctuee	201.56174023358957	0
56	ponctuee	68.3664168359997	0	vide	68.3664168359997	267.6796968152809
57	haute	174.92448637980772	93	haute	173.5378700016836	0.846990863677922
58	haute	69.36340486364728	94	haute	70.75251222776974	8.14476198076601
59	ponctuee	192.00914127823344	96	ponctuee	195.65504424871511	0
60	ponctuee	79.54898519161861	95	ponctuee	94.2461744044063	0.702907479673667
61	alignement	63.48999959253564	0	vide	63.48999959253564	8.813064205706045
62	alignement	73.46792341875638	99	alignement	53.98209870121402	0.095784837588943
63	haute	63.09088498065278	100	haute	68.1001308895474	0.767871073843955
64	haute	118.83904295166488	187	haute	87.41586943717478	0
65	ponctuee	123.70083004469241	101	haute	120.79630323095137	0
66	basse	36.65737206950523	90	basse	45.09243147750524	0.838513543577354
67	haute	39.448823809679446	91	haute	44.752376668029825	0
68	ponctuee	40.430072819712635	0	vide	40.430072819712635	180.47726776794585
69	basse	93.29362617115598	89	basse	72.02811761138183	1.817519173832899
70	alignement	216.1668914893544	78	alignement	209.5908952831549	3.806235684349441
71	ponctuee	22.09812622476427	97	ponctuee	61.28828752416376	5.795183174010216
72	ponctuee	113.60268688422643	88	ponctuee	114.43243577648815	0.254342696923489
73	alignement	65.85415068820662	0	vide	65.85415068820662	73.02389926489701
74	alignement	142.2167564475686	81	alignement	152.0693622496316	1.712713675237405
75	alignement	64.06216247005685	0	vide	64.06216247005685	70.00114997534799
76	alignement	59.01628926127579	82	alignement	54.589400565742125	0
77	haute	121.81056923020296	80	ponctuee	127.95816241242412	0
78	haute	69.00309628259974	83	alignement	68.66535651342204	0
79	ponctuee	108.6597059958301	84	ponctuee	111.97811069249374	0.278266283965505
80	alignement	106.62927455657587	86	alignement	105.50265055561242	0.616954930905136
81	ponctuee	41.38263268881638	0	vide	41.38263268881638	20.855810878368242
82	alignement	35.664501808734265	87	alignement	61.88902581435739	1.042825660156724
83	haute	148.66685715459332	72	haute	148.32056546447598	0
84	ponctuee	219.2393663204831	69	haute	211.68786142014437	0.016689283624942
85	haute	31.479092618981287	0	vide	31.479092618981287	33.62221668891844
86	haute	44.94046619013477	194	haute	42.46836657212856	1.218456373986468
87	ponctuee	53.18624730317354	67	ponctuee	47.311080875017744	0
88	ponctuee	101.94472687350778	68	ponctuee	92.76574031957122	0.065067514588019
89	haute	44.0705494096603	0	vide	44.0705494096603	67.496838131035
90	haute	46.24345182090559	0	vide	46.24345182090559	74.95711635246536
91	alignement	322.63508006932256	76	alignement	317.10176271857125	0.137924125092613
92	basse	69.99318004317236	66	basse	75.40926712607076	0
93	basse	88.35255753481215	65	ponctuee	70.83049868487515	1.501170183649764
94	haute	126.93280147001927	102	haute	95.24944411837271	0
95	haute	161.70489565217983	64	haute	160.38102591529162	0
96	alignement	106.05420617680588	103	alignement	133.30605332433333	0
97	ponctuee	100.11156871295037	111	haute	115.30808184103805	0
98	ponctuee	81.57945834412122	174	ponctuee	75.07182600074177	0
99	haute	123.05661388405981	179	haute	91.32531093857558	0
100	haute	55.36376669970544	178	haute	59.35288712647794	0
101	haute	83.99407343016641	0	vide	83.99407343016641	25.16052146320152
102	ponctuee	59.22465875185462	0	vide	59.22465875185462	6.661464922889546
103	basse	88.5613351500665	0	vide	88.5613351500665	33.214253844564716
104	ponctuee	109.80215701818125	0	vide	109.80215701818125	8.851769510022335
105	haute	30.550920532557797	193	haute	29.141902503431734	0
106	ponctuee	293.2098537510528	192	haute	300.89363407116804	1.041348974671817
107	alignement	88.60918926067984	0	vide	88.60918926067984	10.265401751453865
108	ponctuee	174.44186694461288	184	ponctuee	156.4871519002838	0
109	haute	42.4904973171764	56	haute	44.573350777609704	2.034742073630944
110	ponctuee	125.55501034367089	57	haute	123.13074924710466	0
111	haute	62.21875952424568	180	haute	59.54506366662402	0
112	haute	116.4994878186026	0	vide	116.4994878186026	16.44471644255759
113	haute	66.93102200171536	0	vide	66.93102200171536	81.64673381619257
114	alignement	46.96742271464568	54	alignement	47.57596284923447	0.232852331586767
115	alignement	56.464297015163424	0	vide	56.464297015163424	89.64983403873258
116	alignement	80.50960893676604	205	basse	122.0739611551073	139.95394827587967
117	alignement	56.924317056049546	113	alignement	59.00626581270116	0.334390068385553
118	alignement	39.48109326338242	0	vide	39.48109326338242	11.0999522569218
119	ponctuee	280.27750325854527	114	ponctuee	273.80259264967054	0
120	ponctuee	516.8620051966865	116	haute	515.8243959074393	0
121	ponctuee	74.4719551131263	172	basse	64.70026093282013	2.551269124081015
122	ponctuee	57.50329158616832	117	ponctuee	47.7335996348037	0.334200592981428
123	alignement	67.49714600912897	118	alignement	60.09636643602273	0
124	alignement	80.11623601028712	0	vide	80.11623601028712	125.18793166221366
125	basse	48.556313931227365	125	basse	20.342048313261117	1.839543827407762
126	basse	61.28442344463257	0	vide	61.28442344463257	15.268186442764126
127	basse	17.2948689080297	121	basse	31.343749225597513	2.049257488361306
128	ponctuee	124.74215428644843	120	basse	57.48743352925467	0
129	haute	106.713316282332	199	ponctuee	21.63072558465706	0.144545893861126
130	basse	130.53908316122389	0	vide	130.53908316122389	4.047809231936894
131	haute	220.64675392524035	0	vide	220.64675392524035	100.44086308742894
132	basse	178.15147186378698	126	basse	18.293716658043028	0.300348753263136
133	alignement	276.0352219808811	119	alignement	276.92139902539634	0.144748838101363
134	basse	30.23024898209929	0	vide	30.23024898209929	0.623590202549601
135	alignement	29.027027330046042	133	alignement	28.42624575635414	2.090082314203238
136	basse	219.97161181576948	0	vide	219.97161181576948	33.815094014782126
137	haute	156.69352516995602	124	basse	79.93817535609516	0.168935176128686
138	haute	65.26188776951149	129	basse	64.50122063550921	0.358477467594697
139	alignement	50.56641428655065	135	alignement	42.836129462032964	0.180779906289658
140	alignement	73.19767779437366	134	alignement	78.38029146732077	0
141	alignement	17.9527672584864	0	vide	17.9527672584864	44.4586981904154
142	alignement	273.87711961281747	137	alignement	278.3745894310711	0
143	haute	268.2554882682137	144	basse	229.55325223544583	0.777102347563679
144	alignement	136.0977227654222	138	alignement	184.8825810024138	0
145	alignement	192.9909896398941	141	alignement	197.1365190155204	0
146	alignement	21.969062237663973	142	alignement	114.76726598664105	0
147	basse	218.39784343911978	153	basse	221.19968887850487	0
148	basse	102.35263758360034	154	basse	66.57829148863514	0
149	alignement	63.47471984983254	150	alignement	61.66006627268044	0
150	alignement	17.323605247003165	151	alignement	17.345680685800673	0
151	alignement	33.471176887220196	152	alignement	30.152796177256324	0.030021154743932
152	ponctuee	244.5690466600804	147	haute	257.5952628855374	0
153	haute	58.30873582086776	196	haute	59.283067734090096	0
154	ponctuee	74.52727426438136	146	haute	73.2435801283444	0.203931826208602
155	ponctuee	69.3035161466274	132	ponctuee	44.48280116644975	0
156	ponctuee	108.00511862876878	130	basse	65.47295775602927	0
157	haute	148.30615876134215	157	basse	132.77499537974342	1.753716320994506
158	ponctuee	117.07233309117282	156	basse	139.38926889858743	0
159	ponctuee	123.87112905048683	158	ponctuee	139.5124776948192	0.829797934137073
160	basse	23.204333896773253	0	vide	23.204333896773253	82.46009830874684
161	basse	82.35210412302254	149	basse	41.26511024950685	0.47898891934869
162	basse	83.18376475102605	148	basse	87.0555000734502	0
163	basse	48.63215658373141	0	vide	48.63215658373141	0.512858043489429
164	ponctuee	86.78361540451588	123	haute	97.49971766755179	0
165	ponctuee	90.03517017836782	168	ponctuee	116.21365918575187	0.031444828498185
166	haute	93.7000573365045	159	ponctuee	93.66360064471853	0
167	alignement	57.36309838097326	167	alignement	56.87095871108338	0.774197526901452
168	basse	49.622747092591304	0	vide	49.622747092591304	129.1770077597695
169	ponctuee	37.045515792285194	0	vide	37.045515792285194	14.527959274595597
170	ponctuee	37.64402706246043	0	vide	37.64402706246043	13.981332887540235
171	haute	90.42593604477138	0	vide	90.42593604477138	25.132225962535184
172	ponctuee	94.50924215121071	0	vide	94.50924215121071	59.25785363424051
173	ponctuee	202.7338849058866	0	vide	202.7338849058866	2.767309063468291
174	basse	156.72506336883575	162	basse	141.77602730115473	0
175	ponctuee	56.97425472312407	160	ponctuee	63.73621970350695	0.632682172311454
176	basse	95.14405890347767	161	basse	98.37853343092115	0
177	haute	69.89800445075318	206	haute	35.0721848758479	7.715984051110386
178	ponctuee	75.2877560880776	0	vide	75.2877560880776	10.245076535371869
179	basse	13.670499142132378	197	basse	10.677592683270735	0
180	ponctuee	57.103742900283606	0	vide	57.103742900283606	103.05597136408736
181	basse	99.14008070905085	182	basse	95.63674866370562	0
182	ponctuee	72.0289642893343	0	vide	72.0289642893343	42.58500527091881
183	basse	205.0173441105003	0	vide	205.0173441105003	9.784459961396808
184	basse	37.084575688006325	0	vide	37.084575688006325	5.221877529429475
185	basse	45.88578925999535	52	basse	13.805993796459399	2.074865986566321
186	ponctuee	37.43108113424345	171	ponctuee	35.91168169461341	1.072159782209553
187	haute	73.7005426685882	0	vide	73.7005426685882	8.500224703445605
188	basse	33.34284143895967	0	vide	33.34284143895967	66.3543876260068
189	ponctuee	46.47688298689921	0	vide	46.47688298689921	65.30995716741324
190	basse	92.6512189222442	23	basse	82.09747994298118	0
191	haute	19.04388593105925	183	haute	22.522942688557247	3.81153755997435
192	ponctuee	119.52912526386504	45	ponctuee	123.30734474467314	0.656170063819714
193	basse	107.53009630658191	49	basse	106.36877568117622	0
194	ponctuee	142.6482035743061	27	ponctuee	42.220884723494756	0.417190504300172
195	haute	95.75794137022265	0	vide	95.75794137022265	48.740522735126234
196	ponctuee	30.988903955656045	0	vide	30.988903955656045	43.511818139570146
197	ponctuee	33.561442348909566	70	haute	27.60950157218908	0
198	ponctuee	21.671270980985447	71	basse	17.669435719141923	1.326495311032939
199	haute	55.804272088783456	185	haute	43.9931416189892	0.176852377071948
200	ponctuee	57.38212849615877	98	ponctuee	56.467774792633406	0.467702312377058
201	ponctuee	68.20186919223127	186	ponctuee	40.84934732200831	0.976319868653357
202	haute	47.215682915597306	51	ponctuee	57.39118594842656	0.221545475669989
203	ponctuee	149.89579930176174	131	ponctuee	130.93555359633544	0.532399822289519
204	ponctuee	35.287521105922906	164	haute	20.08987915246224	2.388530646164531
205	ponctuee	80.84849404978166	73	ponctuee	73.49892363270101	0.297550616673482
206	haute	38.4513173480383	74	haute	76.91599700583859	0
207	ponctuee	70.6069172583392	75	haute	73.80244905412722	0.423085447620573
208	alignement	37.27479928493721	79	alignement	41.62223634243763	0.013423691285254
209	haute	52.15413194676965	108	alignement	47.010394343416344	2.018598605773008
210	haute	115.64441446846703	0	vide	115.64441446846703	7.493498547909616
211	basse	58.33000536041924	109	basse	133.38430865692058	0.258694266225113
212	basse	23.764865882489875	110	basse	20.3399958970558	0.162858780429629
213	alignement	15.148054535420567	143	alignement	15.14964221368641	1.629167504789879
214	alignement	14.006714391217066	176	alignement	38.46236970122908	1.426310605404703
215	ponctuee	30.481898662643847	42	ponctuee	95.90548614119078	3.73811499335925
216	alignement	525.1188245372131	136	alignement	528.0458693677692	0
217	alignement	45.84382871492999	200	alignement	45.92953339716831	0
218	vide	67.50551322584629	9	ponctuee	67.50551322584629	0
219	vide	75.64165629949501	10	basse	75.64165629949501	0
220	vide	29.333164980690714	11	basse	29.333164980690714	0
221	vide	96.00033636491082	12	basse	96.00033636491082	0
222	vide	117.7198212501395	17	basse	117.7198212501395	0
223	vide	85.40548435853292	34	ponctuee	85.40548435853292	0
224	vide	39.90818593419291	38	basse	39.90818593419291	0
225	vide	93.17189115390265	50	basse	93.17189115390265	0
226	vide	53.24843347377134	53	alignement	53.24843347377134	0
227	vide	81.69059045033822	55	ponctuee	81.69059045033822	0
228	vide	49.919572959747384	58	alignement	49.919572959747384	0
229	vide	41.582712974618325	59	alignement	41.582712974618325	0
230	vide	47.825841891335585	60	ponctuee	47.825841891335585	0
231	vide	58.14065992521341	61	basse	58.14065992521341	0
232	vide	94.143653722414	62	basse	94.143653722414	0
233	vide	110.65956294616177	63	basse	110.65956294616177	0
234	vide	249.01519548245935	77	alignement	249.01519548245935	0
235	vide	65.59376763917268	85	alignement	65.59376763917268	0
236	vide	174.12924081247604	92	alignement	174.12924081247604	0
237	vide	40.62234262522854	104	basse	40.62234262522854	0
238	vide	92.35912770890225	105	alignement	92.35912770890225	0
239	vide	50.81844122809585	106	alignement	50.81844122809585	0
240	vide	81.08535445874084	107	alignement	81.08535445874084	0
241	vide	22.315111191649574	112	alignement	22.315111191649574	0
242	vide	54.3213741715815	115	alignement	54.3213741715815	0
243	vide	148.83657322053452	122	ponctuee	148.83657322053452	0
244	vide	187.076975538231	127	basse	187.076975538231	0
245	vide	66.80674326720295	128	ponctuee	66.80674326720295	0
246	vide	281.8168699362157	145	basse	281.8168699362157	0
247	vide	24.71277771196634	155	alignement	24.71277771196634	0
248	vide	40.66481334867119	163	basse	40.66481334867119	0
249	vide	37.95124317843247	165	basse	37.95124317843247	0
250	vide	37.99956728243562	166	alignement	37.99956728243562	0
251	vide	37.13144480091443	169	alignement	37.13144480091443	0
252	vide	82.83503613895134	170	basse	82.83503613895134	0
253	vide	63.81561881551656	173	haute	63.81561881551656	0
254	vide	45.0652803485629	175	ponctuee	45.0652803485629	0
255	vide	128.0734308237517	177	basse	128.0734308237517	0
256	vide	63.51132759819052	181	ponctuee	63.51132759819052	0
257	vide	20.96328535659522	188	basse	20.96328535659522	0
258	vide	33.69278129977544	195	haute	33.69278129977544	0
259	vide	49.63627911706136	198	basse	49.63627911706136	0
260	vide	30.10128041720922	201	ponctuee	30.10128041720922	0
261	vide	32.46966242369094	202	ponctuee	32.46966242369094	0
262	vide	38.16702858552757	203	ponctuee	38.16702858552757	0
263	vide	56.89485556593378	204	basse	56.89485556593378	0

## Sheet: 2000_2019
fid	Type_haie	Longueur	join_fid	join_Type_	join_Longu	distance
1	ponctuee	204.7327657992108	1	haute	232.98802944707467	0
2	ponctuee	598.6787658980277	3	ponctuee	607.0028165985584	0
3	alignement	61.55079902475661	4	ponctuee	63.01868100719713	0.081726507122037
4	alignement	55.818208606528984	0	vide	55.818208606528984	10.001924373468352
5	ponctuee	59.2526139399201	0	vide	59.2526139399201	2.418287584721738
6	basse	62.22226710573968	0	vide	62.22226710573968	5.416785000759984
7	ponctuee	109.32228742473612	2	ponctuee	230.92070034134017	0
8	haute	47.29588039724795	5	haute	34.23874532237083	0
9	ponctuee	67.50551322584629	0	vide	67.50551322584629	93.53776384049934
10	basse	75.64165629949501	16	basse	23.488357271542323	0.977616972027477
11	basse	29.333164980690714	6	ponctuee	26.439655526446042	2.007437326963466
12	basse	96.00033636491082	202	ponctuee	71.12296324331001	0.966322415926166
13	haute	143.49895462106926	7	haute	205.8103973221279	0
14	haute	84.8923581248387	220	basse	64.8347046499983	0.367318430796761
15	haute	93.67359573469932	13	haute	111.43892900482263	2.346987807943917
16	ponctuee	29.618366125899936	15	ponctuee	31.876386014329483	1.406986956402185
17	basse	117.7198212501395	9	basse	98.55429910583688	0
18	ponctuee	75.42843886688057	10	ponctuee	76.8957669909615	0
19	alignement	58.39406641064486	0	vide	58.39406641064486	14.549949756938389
20	haute	49.80444488146727	11	haute	55.33296567226965	0.816054779723727
21	haute	43.31409513513755	12	haute	50.170024032067445	0
22	haute	102.36588447490838	14	haute	102.2178792869709	0
23	basse	82.09747994298118	19	basse	72.0313046072778	1.360702363433866
24	ponctuee	201.56174023358957	20	ponctuee	206.4196308436657	0
25	ponctuee	226.74716463753376	181	ponctuee	225.57282721121916	0
26	basse	63.58596596849684	203	basse	49.40330938692977	1.227631241777955
27	ponctuee	42.220884723494756	221	ponctuee	41.30357831048426	0
28	alignement	134.92964146886476	26	alignement	139.90916595018487	0
29	alignement	157.89247864743004	25	alignement	164.41305156693824	0
30	haute	205.77942360058267	24	haute	205.41155657266057	0
31	ponctuee	155.08631358668742	23	ponctuee	121.71911100565421	0
32	haute	128.12001884175405	22	haute	133.15689249774056	0
33	haute	111.8281213414424	21	haute	102.90670884279706	0
34	ponctuee	85.40548435853292	0	vide	85.40548435853292	5.830609508190528
35	ponctuee	44.6260637095631	94	ponctuee	48.91885647307252	0.812018182309053
36	ponctuee	110.65828879679881	27	basse	25.334256093012012	2.787284366451473
37	alignement	48.30227156311951	134	alignement	49.85303651292359	1.192010199013107
38	basse	39.90818593419291	92	ponctuee	58.63570088067816	0
39	alignement	104.63566272628174	108	alignement	107.95752133483693	0.210161042652316
40	alignement	101.94072403033529	109	alignement	102.38327999252307	1.123809640083979
41	basse	132.07542754659494	31	ponctuee	31.26596121245449	0.38534168009286
42	ponctuee	95.90548614119078	28	ponctuee	84.62159628048246	0.999479331610069
43	alignement	41.07038299305471	36	alignement	41.837899448722766	0.623487836048857
44	alignement	318.9061853761781	37	alignement	229.17663807785087	0
45	ponctuee	123.30734474467314	127	ponctuee	82.44633994929474	0
46	alignement	33.64556372289377	40	alignement	34.01047289471183	3.155494168316084
47	alignement	27.998619658764166	41	alignement	22.137192260893904	2.087220369974353
48	alignement	24.911843271403058	34	alignement	24.46802060723129	0.146967411311499
49	basse	106.36877568117622	33	basse	115.45471929204749	0
50	basse	93.17189115390265	32	haute	82.86389429852842	0
51	ponctuee	57.39118594842656	150	basse	25.603032792763294	1.834494872819893
52	basse	13.805993796459399	163	basse	19.733839198115245	0.366366449670437
53	alignement	53.24843347377134	129	alignement	54.7721457234549	2.279505274543216
54	alignement	47.57596284923447	91	alignement	55.39542156708102	0.642961638367425
55	ponctuee	81.69059045033822	107	basse	86.9211641484737	0
56	haute	44.573350777609704	116	haute	40.63521120312636	0
57	haute	123.13074924710466	117	haute	50.88178813618191	0.632156150368525
58	alignement	49.919572959747384	88	alignement	51.394140556188965	0
59	alignement	41.582712974618325	89	alignement	60.036426142127944	1.119703408780931
60	ponctuee	47.825841891335585	87	haute	51.05298879335544	0
61	basse	58.14065992521341	113	haute	60.61033082506629	0.684520313332534
62	basse	94.143653722414	206	haute	98.16470738412346	0
63	basse	110.65956294616177	115	haute	117.26280751450237	0
64	haute	160.38102591529162	85	haute	160.2865225216055	0
65	ponctuee	70.83049868487515	82	haute	75.76318981443231	0.742063225203213
66	basse	75.40926712607076	84	ponctuee	43.82121884089176	1.159163962717335
67	ponctuee	47.311080875017744	216	ponctuee	51.829690874310536	0.735416481798
68	ponctuee	92.76574031957122	225	ponctuee	45.9320192778788	14.303951917252503
69	haute	211.68786142014437	103	haute	213.52027655858066	0.088650071344437
70	haute	27.60950157218908	102	haute	24.316985020097235	0.640366482138061
71	basse	17.669435719141923	101	basse	26.802936089329705	0.850636788854767
72	haute	148.32056546447598	100	haute	146.7449321674452	0
73	ponctuee	73.49892363270101	106	ponctuee	67.0581709478223	0
74	haute	76.91599700583859	105	haute	86.20455274140656	0
75	haute	73.80244905412722	183	haute	70.22342885773759	0.647328252519442
76	alignement	317.10176271857125	64	alignement	322.9659154251328	0
77	alignement	249.01519548245935	65	alignement	245.42200003028188	0
78	alignement	209.5908952831549	66	alignement	200.26607520412858	0.74578126302689
79	alignement	41.62223634243763	68	alignement	39.7048812764776	0.306664440190224
80	ponctuee	127.95816241242412	73	ponctuee	132.40765700165642	0
81	alignement	152.0693622496316	70	alignement	79.83364406411306	0
82	alignement	54.589400565742125	71	alignement	53.98333445762624	0
83	alignement	68.66535651342204	74	alignement	67.60548150521312	0
84	ponctuee	111.97811069249374	75	haute	121.43546366719688	0.88571455128566
85	alignement	65.59376763917268	188	alignement	60.839237869711496	0
86	alignement	105.50265055561242	79	alignement	110.15650554697895	0.950698578630475
87	alignement	61.88902581435739	78	alignement	64.0518193832238	0
88	ponctuee	114.43243577648815	69	ponctuee	109.58905811424694	0.253644071090428
89	basse	72.02811761138183	0	vide	72.02811761138183	126.62963656950718
90	basse	45.09243147750524	59	haute	57.49372071805702	2.314993186587727
91	haute	44.752376668029825	204	haute	46.13229852119332	1.19642102960012
92	alignement	174.12924081247604	58	alignement	129.71145112235178	0
93	haute	173.5378700016836	29	haute	165.97855137394924	0
94	haute	70.75251222776974	51	haute	84.43029198395121	0
95	ponctuee	94.2461744044063	53	ponctuee	93.07915431786759	0.813475160108956
96	ponctuee	195.65504424871511	223	basse	67.94670906959541	0.151314738796886
97	ponctuee	61.28828752416376	205	basse	20.225355243300587	0.211412386367043
98	ponctuee	56.467774792633406	52	ponctuee	59.56743593538399	0.553620551582378
99	alignement	53.98209870121402	54	alignement	55.89447921053314	0
100	haute	68.1001308895474	0	vide	68.1001308895474	10.903563801410334
101	haute	120.79630323095137	63	haute	116.83480881799989	0
102	haute	95.24944411837271	111	haute	95.70443872620865	1.611014102068046
103	alignement	133.30605332433333	55	alignement	136.57709058925872	1.407700411682742
104	basse	40.62234262522854	56	haute	42.35064469468763	0.831445761898263
105	alignement	92.35912770890225	189	alignement	94.70918583590685	0
106	alignement	50.81844122809585	208	alignement	54.69715423593188	0.163403287293097
107	alignement	81.08535445874084	97	alignement	48.7088453324346	1.638212502657401
108	alignement	47.010394343416344	0	vide	47.010394343416344	20.599499231661294
109	basse	133.38430865692058	47	ponctuee	120.68163835897573	0.292880257308047
110	basse	20.3399958970558	49	haute	22.042076104358365	0
111	haute	115.30808184103805	45	haute	59.944939554268004	1.845279484866655
112	alignement	22.315111191649574	38	alignement	35.13805106711285	5.147534755395555
113	alignement	59.00626581270116	131	alignement	261.5203699403527	1.798360379448062
114	ponctuee	273.80259264967054	118	ponctuee	269.2807354337333	0
115	alignement	54.3213741715815	224	haute	67.40398991431324	0
116	haute	515.8243959074393	119	haute	529.7110311790335	0
117	ponctuee	47.7335996348037	186	haute	56.72035608413517	0.356946536574991
118	alignement	60.09636643602273	124	alignement	58.98778542493264	1.963042628560346
119	alignement	276.92139902539634	147	alignement	275.4852428856877	0.320890881652319
120	basse	57.48743352925467	151	haute	69.20948230233289	0
121	basse	31.343749225597513	152	ponctuee	31.091424670218142	0
122	ponctuee	148.83657322053452	168	haute	127.26669003606067	1.253267597037916
123	haute	97.49971766755179	201	haute	91.20413110292547	0.24407076505721
124	basse	79.93817535609516	155	ponctuee	59.26744809607611	0.798261272659121
125	basse	20.342048313261117	120	haute	50.26855941375826	0
126	basse	18.293716658043028	148	ponctuee	95.44678456470187	1.384832001808324
127	basse	187.076975538231	226	ponctuee	25.946942466510134	2.197671616179903
128	ponctuee	66.80674326720295	0	vide	66.80674326720295	33.4850524176022
129	basse	64.50122063550921	210	ponctuee	100.17462056733953	0
130	basse	65.47295775602927	209	ponctuee	107.95430936339646	0
131	ponctuee	130.93555359633544	156	ponctuee	152.35742360581352	0.257697254526753
132	ponctuee	44.48280116644975	157	ponctuee	47.34112064658911	1.495813051551471
133	alignement	28.42624575635414	146	alignement	31.367009615930527	5.472771085688642
134	alignement	78.38029146732077	144	alignement	81.95192915950948	2.025687559701151
135	alignement	42.836129462032964	145	alignement	44.18066848269996	2.022697476046705
136	alignement	528.0458693677692	135	alignement	536.7511787513582	0
137	alignement	278.3745894310711	136	alignement	282.74896367778257	1.118634612552981
138	alignement	184.8825810024138	137	alignement	163.22313969527718	0.210808706725815
139	alignement	29.51611446569794	133	alignement	28.20793609478908	3.823138134000483
140	alignement	235.70357510167662	132	alignement	236.8302518325955	3.705324905441754
141	alignement	197.1365190155204	143	alignement	198.40710023553396	0
142	alignement	114.76726598664105	142	alignement	77.17480143658587	0.644163798160366
143	alignement	15.14964221368641	195	alignement	16.741432408605807	3.373863315063965
144	basse	229.55325223544583	138	haute	251.15833781523577	0
145	basse	281.8168699362157	139	basse	294.4262147427072	0.46422076259882
146	haute	73.2435801283444	158	haute	66.88971230519331	0.541431682448659
147	haute	257.5952628855374	159	haute	251.2342591806477	0
148	basse	87.0555000734502	0	vide	87.0555000734502	27.079100682652694
149	basse	41.26511024950685	160	ponctuee	33.15780890752426	0.543117183504143
150	alignement	61.66006627268044	193	alignement	64.26891751974384	1.479052682459828
151	alignement	17.345680685800673	192	alignement	21.050739785875113	0.623340578205348
152	alignement	30.152796177256324	191	alignement	21.960256681917937	0.624754096001969
153	basse	221.19968887850487	141	haute	222.79451306932467	0
154	basse	66.57829148863514	140	haute	67.69654270823777	0
155	alignement	24.71277771196634	194	alignement	24.04166748791431	1.36029731496372
156	basse	139.38926889858743	0	vide	139.38926889858743	8.073286126291782
157	basse	132.77499537974342	161	ponctuee	147.4711241147596	0
158	ponctuee	139.5124776948192	211	ponctuee	155.68363113390149	0.255426956565972
159	ponctuee	93.66360064471853	165	ponctuee	89.3154519360711	0
160	ponctuee	63.73621970350695	164	ponctuee	62.57769718563669	0.253823547111806
161	basse	98.37853343092115	166	ponctuee	86.98246033678586	2.003375188745446
162	basse	141.77602730115473	162	ponctuee	140.92376993760917	0
163	basse	40.66481334867119	227	basse	32.69553835274968	3.186333105478894
164	haute	20.08987915246224	177	haute	23.508639410698034	0.374086145849251
165	basse	37.95124317843247	77	basse	59.42433531428901	0.631891971243579
166	alignement	37.99956728243562	0	vide	37.99956728243562	5.001884460714269
167	alignement	56.87095871108338	0	vide	56.87095871108338	65.57243212228147
168	ponctuee	116.21365918575187	167	ponctuee	105.9688630490796	0.403739013509248
169	alignement	37.13144480091443	198	alignement	33.819171279328614	1.340698265688378
170	basse	82.83503613895134	170	ponctuee	62.278398108020085	0.847059955414676
171	ponctuee	35.91168169461341	0	vide	35.91168169461341	55.94795402511721
172	basse	64.70026093282013	185	basse	35.00131705294242	0.639010672356529
173	haute	63.81561881551656	0	vide	63.81561881551656	39.20363535339879
174	ponctuee	75.07182600074177	187	haute	32.90292136641828	0
175	ponctuee	45.0652803485629	0	vide	45.0652803485629	6.584055995961429
176	alignement	38.46236970122908	199	ponctuee	49.13050927820111	0
177	basse	128.0734308237517	0	vide	128.0734308237517	5.170223346489925
178	haute	59.35288712647794	0	vide	59.35288712647794	36.0088360663941
179	haute	91.32531093857558	0	vide	91.32531093857558	2.155314437992804
180	haute	59.54506366662402	126	haute	60.6745691600174	2.724100934413205
181	ponctuee	63.51132759819052	44	ponctuee	70.64281031709862	0
182	basse	95.63674866370562	228	basse	108.89097055973586	95.68847292180448
183	haute	22.522942688557247	200	haute	22.232380669266938	0
184	ponctuee	156.4871519002838	90	ponctuee	155.45782717025983	0.56816630807661
185	haute	43.9931416189892	184	ponctuee	34.04679349082255	0.061571139207151
186	ponctuee	40.84934732200831	182	basse	49.228318144330935	0.149034786372532
187	haute	87.41586943717478	112	haute	98.96522935614855	0.441884209329966
188	basse	20.96328535659522	153	ponctuee	52.11414136012226	0
189	haute	51.51973243446558	212	haute	53.95216843252032	0
190	ponctuee	58.46916420400249	213	ponctuee	54.12040221235122	0
191	ponctuee	61.67647024239132	214	ponctuee	89.6740968387113	0.933428045010343
192	haute	300.89363407116804	215	haute	303.4739810558836	1.225555766443111
193	haute	29.141902503431734	229	ponctuee	32.10085473352147	1.988117895075644
194	haute	42.46836657212856	0	vide	42.46836657212856	3.033252671302724
195	haute	33.69278129977544	218	haute	28.71393861049701	0
196	haute	59.283067734090096	219	haute	97.37220271559865	1.754183117631183
197	basse	10.677592683270735	178	haute	10.676182801626956	0
198	basse	49.63627911706136	0	vide	49.63627911706136	87.97046934494942
199	ponctuee	21.63072558465706	149	ponctuee	97.11761457077195	0
200	alignement	45.92953339716831	114	alignement	48.810247438525735	0
201	ponctuee	30.10128041720922	57	haute	94.99316767615882	0
202	ponctuee	32.46966242369094	125	ponctuee	29.894243051640128	0
203	ponctuee	38.16702858552757	171	ponctuee	35.192398274880524	0
204	basse	56.89485556593378	172	basse	49.396188343617006	0
205	basse	122.0739611551073	230	ponctuee	97.72415556711711	0
206	haute	35.0721848758479	0	vide	35.0721848758479	0
207	vide	74.0673635074674	8	basse	74.0673635074674	0
208	vide	42.508658839600216	17	basse	42.508658839600216	0
209	vide	28.7813836296188	18	basse	28.7813836296188	0
210	vide	81.06683413498152	30	basse	81.06683413498152	0
211	vide	17.213866809841097	35	alignement	17.213866809841097	0
212	vide	48.11559158304953	39	basse	48.11559158304953	0
213	vide	106.93113549039656	42	ponctuee	106.93113549039656	0
214	vide	163.62981962983386	43	ponctuee	163.62981962983386	0
215	vide	104.3251679555848	46	ponctuee	104.3251679555848	0
216	vide	111.12775191633695	48	alignement	111.12775191633695	0
217	vide	36.17625940457282	50	alignement	36.17625940457282	0
218	vide	38.20606854126027	60	basse	38.20606854126027	0
219	vide	10.313950459821887	61	basse	10.313950459821887	0
220	vide	40.885622982045575	62	basse	40.885622982045575	0
221	vide	125.11461497357875	67	haute	125.11461497357875	0
222	vide	31.26153276335242	72	alignement	31.26153276335242	0
223	vide	21.168678144493533	76	basse	21.168678144493533	0
224	vide	74.35318623425351	80	alignement	74.35318623425351	0
225	vide	90.44958307000324	81	alignement	90.44958307000324	0
226	vide	52.076576844868136	83	alignement	52.076576844868136	0
227	vide	87.94763687826728	86	ponctuee	87.94763687826728	0
228	vide	53.161740468712686	93	basse	53.161740468712686	0
229	vide	57.88135877661228	95	basse	57.88135877661228	0
230	vide	87.81142342308699	96	basse	87.81142342308699	0
231	vide	104.70621888771807	98	basse	104.70621888771807	0
232	vide	104.87359684038506	99	basse	104.87359684038506	0
233	vide	30.21639229193589	104	ponctuee	30.21639229193589	0
234	vide	33.381930841869924	110	basse	33.381930841869924	0
235	vide	27.963243327513155	121	ponctuee	27.963243327513155	0
236	vide	59.34003270734243	122	basse	59.34003270734243	0
237	vide	180.2972202678017	123	alignement	180.2972202678017	0
238	vide	62.55240896425426	128	ponctuee	62.55240896425426	0
239	vide	40.96221639716545	130	basse	40.96221639716545	0
240	vide	23.340488046456105	154	haute	23.340488046456105	0
241	vide	86.07697513520077	169	ponctuee	86.07697513520077	0
242	vide	52.65778129375592	173	basse	52.65778129375592	0
243	vide	142.07929626582916	174	basse	142.07929626582916	0
244	vide	40.61009211794745	175	ponctuee	40.61009211794745	0
245	vide	95.10280239680125	176	ponctuee	95.10280239680125	0
246	vide	64.4771310301039	179	basse	64.4771310301039	0
247	vide	24.32930342947556	180	alignement	24.32930342947556	0
248	vide	75.59079684629387	190	basse	75.59079684629387	0
249	vide	26.56037529918777	196	ponctuee	26.56037529918777	0
250	vide	33.43472221625411	197	basse	33.43472221625411	0
251	vide	69.33727143504066	207	basse	69.33727143504066	0
252	vide	30.3132738998991	217	ponctuee	30.3132738998991	0
253	vide	50.82829148520764	222	alignement	50.82829148520764	0
