# Supplementary material for: Integrating adaptation pathways and Ostrom’s framework for sustainable governance of social-ecological systems in a changing world
Source: PeerJ journal article supplement (doi:10.7717/peerj.18938), 2025-02-24
Supplement: FileS4.zip [file Veyre_Monton_1989_2000_2019_QG.xlsx]

## Sheet: 1989_2000
id	Type_haie	Longueur	join_id	join_Type_	join_Longu	distance
1	ponctuee	133.506	1	ponctuee	129.752	3.093764139077129
2	ponctuee	115.516	2	ponctuee	108.34	0
3	ponctuee	245.579	3	ponctuee	285.4	0
4	ponctuee	473.57	5	ponctuee	312.843	0
5	ponctuee	172.486	269	ponctuee	182.013	0
6	basse	63.888	268	ponctuee	62.614	0
7	basse	90.431	0	vide	90.431	26.48500363479565
8	basse	41.845	0	vide	41.845	82.57795790269074
9	ponctuee	111.041	270	ponctuee	103.429	1.975407153050308
10	alignement	150.85	12	alignement	151.139	0
11	alignement	50.801	14	alignement	50.13	0.309647243061626
12	alignement	85.087	18	alignement	42.243	0
13	haute	123.68	0	vide	123.68	59.51812667188058
14	ponctuee	203.973	271	ponctuee	200.09	0
15	alignement	144.456	0	vide	144.456	59.661497086076466
16	basse	42.586	0	vide	42.586	139.04228034764526
17	basse	308.363	55	basse	115.165	0
18	basse	91.026	21	haute	89.593	0.251013082271932
19	ponctuee	100.439	0	vide	100.439	41.84872262544205
20	ponctuee	146.18	56	haute	83.629	0
21	ponctuee	109.934	57	haute	103.518	0
22	alignement	45.763	50	alignement	44.547	1.62025492352722
23	alignement	77.56	22	alignement	79.225	0
24	ponctuee	112.974	23	ponctuee	106.381	0
25	alignement	68.819	25	alignement	75.646	0
26	ponctuee	30.031	0	vide	30.031	1.69512013522204
27	basse	41.806	58	basse	70.074	0.924831563418793
28	alignement	67.603	29	alignement	85.465	0.521348454880834
29	ponctuee	24.752	63	ponctuee	55.508	0.031245168780089
30	ponctuee	48.472	59	ponctuee	43.474	0
31	ponctuee	88.742	64	ponctuee	90.607	0
32	haute	33.191	272	haute	32.129	1.050328047412
33	alignement	42.04	30	alignement	63.985	0
34	basse	57.611	31	basse	51.481	0.289930417370949
35	basse	84.457	32	basse	95.973	0.454346183888894
36	ponctuee	68.178	33	haute	69.831	0
37	basse	36.704	34	basse	36.006	0.699632718732215
38	alignement	35.954	49	alignement	35.746	2.467293016247845
39	ponctuee	95.749	26	ponctuee	93.663	0
40	ponctuee	93.278	0	vide	93.278	10.360520403023108
41	haute	37.193	273	haute	27.093	0
42	haute	107.484	68	haute	94.733	0
43	ponctuee	126.463	66	ponctuee	138.067	0
44	ponctuee	44.383	65	haute	42.043	0.09754969510203
45	ponctuee	41.33	67	ponctuee	43.221	1.150860535264655
46	alignement	44.04	48	alignement	43.555	1.36188012385068
47	basse	39.651	47	basse	38.608	0
48	alignement	112.357	0	vide	112.357	27.11282582601801
49	ponctuee	155.821	35	ponctuee	156.107	1.035890907832668
50	haute	99.691	274	haute	99.551	0.122567197391192
51	basse	100.432	69	basse	103.763	0
52	alignement	107.846	0	vide	107.846	25.989857050879994
53	basse	33.754	10	ponctuee	134.032	0
54	basse	58.312	267	haute	56.136	0.408682777807444
55	basse	69.839	0	vide	69.839	98.39114322511921
56	alignement	21.404	54	alignement	24.845	0
57	basse	40.136	17	haute	38.345	0
58	haute	155.319	0	vide	155.319	129.83112104017687
59	ponctuee	112.126	87	ponctuee	113.787	0
60	basse	81.563	89	basse	49.276	0
61	basse	58.498	0	vide	58.498	3.286934736386109
62	basse	178.417	82	basse	148.558	0
63	basse	62.927	80	basse	110.213	1.840700278144282
64	basse	63.304	276	basse	59.01	0
65	basse	48.461	275	ponctuee	44.797	0
66	ponctuee	89.751	0	vide	89.751	68.23538626028396
67	ponctuee	85.319	0	vide	85.319	68.96046472306644
68	ponctuee	77.3	0	vide	77.3	93.74999644745141
69	ponctuee	93.052	0	vide	93.052	39.628217445990806
70	ponctuee	64.267	277	ponctuee	71.157	0
71	basse	25.038	0	vide	25.038	17.016853864346892
72	alignement	40.567	75	alignement	40.841	4.882070525743322
73	ponctuee	178.085	70	ponctuee	115.506	0
74	ponctuee	61.283	0	vide	61.283	4.873701725014701
75	ponctuee	45.976	0	vide	45.976	29.191219184084485
76	basse	24.894	0	vide	24.894	10.009506051679322
77	haute	36.061	0	vide	36.061	46.46346540785172
78	ponctuee	76.28	0	vide	76.28	69.71050185321089
79	basse	97.322	37	basse	98.41	0.643531722853462
80	basse	130.559	38	ponctuee	87.783	4.564424493309898
81	ponctuee	145.715	301	ponctuee	111.717	1.381938835916332
82	ponctuee	75.956	263	ponctuee	91.081	1.811633916808816
83	haute	217.027	42	haute	206.86	0
84	basse	213.565	41	basse	71.008	2.394668130044635
85	alignement	39.561	45	alignement	37.938	0
86	haute	68.411	44	haute	73.167	0.145337012003861
87	basse	32.782	46	ponctuee	80.724	1.186589793056889
88	ponctuee	72.276	278	ponctuee	79.177	0
89	basse	75.083	86	basse	47.104	3.066891478813916
90	ponctuee	76.351	83	ponctuee	38.826	1.345490081634734
91	basse	102.653	84	basse	43.187	0
92	ponctuee	46.669	279	ponctuee	48.517	0
93	alignement	66.383	90	alignement	72.008	0
94	basse	81.866	91	ponctuee	77.355	0
95	ponctuee	89.246	85	haute	60.961	2.019536070407657
96	ponctuee	99.29	94	ponctuee	78.676	0
97	ponctuee	74.894	93	ponctuee	64.223	0
98	basse	25.913	280	basse	29.877	0
99	ponctuee	101.731	0	vide	101.731	4.007683158520352
100	basse	27.616	92	ponctuee	38.673	2.253922899167695
101	haute	85.114	74	haute	92.78	0
102	haute	66.167	73	ponctuee	68.274	1.675037249594607
103	alignement	48.01	224	alignement	63.678	0
104	basse	21.423	223	basse	31.142	5.042116071954313
105	basse	126.458	0	vide	126.458	101.5034984433601
106	alignement	64.105	212	alignement	79.186	0.306044640525733
107	ponctuee	160.36	0	vide	160.36	4.280893730537668
108	basse	144.345	97	basse	135.859	0
109	haute	19.85	95	haute	18.505	1.243853556869024
110	haute	64.8	100	haute	48.097	2.541332987750799
111	haute	128.024	130	haute	95.919	0
112	ponctuee	123.015	0	vide	123.015	47.26540253002541
113	haute	65.412	0	vide	65.412	75.49149451621304
114	haute	66.319	129	haute	67.531	0
115	haute	98.148	128	haute	99.782	0.169555302206059
116	haute	80.42	127	haute	86.355	3.271781909046181
117	haute	84.194	103	haute	89.295	0.568561717948008
118	basse	69.154	104	basse	76.109	1.249012961430503
119	haute	102.308	126	haute	110.513	0.543053230397167
120	basse	75.205	105	basse	66.94	0.258515371503866
121	basse	432.495	106	basse	465.131	0
122	ponctuee	351.38	107	ponctuee	356.755	0
123	ponctuee	34.363	108	ponctuee	32.216	0
124	basse	34.38	109	basse	35.378	1.083068427414455
125	basse	202.273	111	basse	193.224	0
126	ponctuee	120.635	112	basse	121.436	2.889086097772246
127	ponctuee	157.483	114	ponctuee	157.785	2.555350946091887
128	ponctuee	834.961	116	ponctuee	846.933	0
129	ponctuee	100.581	123	ponctuee	165.173	0.063525655899125
130	basse	142.321	122	basse	141.882	1.323365377304619
131	alignement	14.658	120	alignement	20.245	0
132	alignement	94.693	121	alignement	99.648	0.012380526578553
133	alignement	34.769	125	alignement	34.828	0
134	basse	25.681	124	basse	37.359	2.319480274981911
135	alignement	176.639	119	alignement	273.897	0
136	alignement	47.466	110	alignement	51.557	1.217874811843032
137	ponctuee	186.134	133	basse	192.596	0.253212210424525
138	ponctuee	28.051	132	basse	33.295	3.901982570736461
139	basse	67.893	131	ponctuee	81.101	0.521301179220128
140	haute	386.353	213	haute	375.601	0
141	haute	45.89	215	haute	50.477	0
142	haute	214.673	205	haute	143.803	0
143	ponctuee	121.153	204	ponctuee	119.924	0
144	haute	75.603	0	vide	75.603	8.739909768858407
145	ponctuee	162.552	206	ponctuee	163.614	0.606929363553316
146	haute	155.371	220	haute	138.791	0
147	haute	116.799	194	haute	119.736	0
148	haute	684.845	208	haute	499.507	0
149	haute	92.415	209	haute	95.181	0
150	ponctuee	193.178	207	ponctuee	188.326	0.182778039776445
151	ponctuee	49.746	196	ponctuee	47.103	0.409512626043453
152	ponctuee	99.092	195	haute	112.463	0.371062857785655
153	alignement	40.457	192	alignement	32.512	2.608825975028401
154	alignement	34.823	193	alignement	47.678	0
155	ponctuee	58.443	281	ponctuee	68.794	0.193058330866582
156	ponctuee	71.567	190	ponctuee	128.237	0
157	basse	70.889	188	basse	96.94	0.111251640031927
158	ponctuee	78.505	185	ponctuee	64.59	0
159	ponctuee	147.009	187	ponctuee	144.347	0
160	basse	83.204	155	basse	103.124	0
161	ponctuee	70.02	154	ponctuee	97.17	0
162	ponctuee	189.7	139	ponctuee	191.264	0
163	ponctuee	277.987	138	ponctuee	274.806	0
164	basse	30.685	151	basse	25.426	0.442617333938571
165	basse	92.01	0	vide	92.01	35.70004536588697
166	basse	119.243	149	basse	118.153	0.020601767727312
167	haute	63.062	136	haute	55.759	0
168	basse	47.232	134	basse	46.336	0
169	haute	61.032	170	haute	66.111	0.780702097650615
170	ponctuee	156.375	101	basse	131.592	0.458906089033161
171	haute	83.388	0	vide	83.388	9.064779808193572
172	haute	116.831	283	haute	122.526	0
173	alignement	90.884	201	alignement	84.543	1.130137981521211
174	basse	78.665	203	basse	42.157	1.00713297391216
175	basse	109.694	0	vide	109.694	66.53387981774603
176	ponctuee	86.634	140	ponctuee	98.918	0.944457645509357
177	ponctuee	148.588	142	basse	148.93	0
178	ponctuee	67.652	141	ponctuee	75.897	0
179	ponctuee	170.78	145	ponctuee	181.808	0
180	basse	39.891	153	basse	159.847	1.581998203524316
181	alignement	50.658	146	alignement	49.608	0.559215636661356
182	ponctuee	163.411	147	ponctuee	142.138	0
183	alignement	26.976	0	vide	26.976	26.892535207790548
184	ponctuee	56.758	177	basse	50.446	1.19981499849712
185	ponctuee	117.299	0	vide	117.299	70.68063811556806
186	haute	107.876	175	haute	90.195	2.320982389456757
187	ponctuee	75.123	176	ponctuee	65.495	0
188	basse	42.664	0	vide	42.664	33.07169947499311
189	basse	76.26	0	vide	76.26	31.827554324170944
190	basse	36.019	284	basse	34.853	4.752563271638126
191	ponctuee	99.135	174	basse	63.753	0
192	basse	93.532	0	vide	93.532	38.79089976088998
193	haute	107.623	226	haute	85.522	0
194	ponctuee	75.01	0	vide	75.01	14.898495838554489
195	basse	58.917	0	vide	58.917	69.68591270194584
196	ponctuee	46.217	171	ponctuee	48.373	2.703160586236849
197	ponctuee	60.859	166	haute	42.867	3.217931104979594
198	basse	39.065	165	basse	28.908	1.607913853713676
199	haute	69.408	163	haute	69.722	2.119454587860567
200	ponctuee	33.434	285	ponctuee	33.25	0.496726374379018
201	ponctuee	48.72	286	ponctuee	53.54	0.432545846325362
202	ponctuee	40.318	287	ponctuee	39.127	0.851504634747049
203	basse	25.31	288	basse	28.366	0
204	ponctuee	66.066	172	haute	69.206	0
205	ponctuee	20.282	173	haute	28.285	0
206	basse	58.886	161	ponctuee	50.506	7.738990231145486
207	basse	119.412	162	basse	108.63	7.601427788921828
208	basse	27.118	289	basse	26.807	8.60696033734572
209	ponctuee	354.716	159	haute	364.507	0
210	ponctuee	225.316	182	ponctuee	230.297	0
211	basse	99.751	183	basse	87.461	0
212	basse	43.546	167	basse	93.156	0
213	basse	62.914	0	vide	62.914	21.533849585817695
214	ponctuee	165.146	164	ponctuee	83.229	0.213096264997964
215	basse	59.355	160	ponctuee	110.284	0
216	ponctuee	124.288	158	ponctuee	104.44	0
217	basse	34.426	290	basse	36.446	1.140933187134846
218	basse	73.314	168	basse	37.763	0
219	basse	66.701	169	basse	77.491	0
220	basse	87.237	282	basse	86.668	0.964132733239603
221	alignement	100.499	178	alignement	85.994	0
222	ponctuee	68.98	227	haute	55.414	0.39609510702458
223	haute	37.738	229	haute	38.108	0.351282726884269
224	ponctuee	45.175	228	ponctuee	41.829	1.252514491882277
225	ponctuee	293.725	230	ponctuee	235.749	0
226	ponctuee	60.953	231	ponctuee	67.681	2.049269693398625
227	ponctuee	70.384	232	ponctuee	32.04	0.928347790523966
228	ponctuee	119.108	233	ponctuee	125.306	0.414820265165808
229	basse	55.654	234	ponctuee	67.564	0
230	ponctuee	94.791	239	ponctuee	89.011	0.275413695367058
231	haute	51.276	238	haute	78.056	0
232	ponctuee	64.721	236	ponctuee	51.097	0
233	ponctuee	82.722	249	ponctuee	88.357	0
234	ponctuee	68.519	240	ponctuee	97.388	0.898414037714848
235	basse	40.49	0	vide	40.49	19.317463401781495
236	ponctuee	82.658	241	haute	82.316	0
237	ponctuee	80	246	ponctuee	54.387	4.375266934731658
238	basse	58.223	245	ponctuee	51.58	0
239	basse	87.538	248	basse	34.541	0
240	basse	39.079	243	basse	42.207	0
241	ponctuee	329.29	244	haute	312.053	7.104427100394282
242	ponctuee	84.323	266	ponctuee	76.818	0.620699372025785
243	ponctuee	62.84	265	ponctuee	63.113	0
244	ponctuee	142.52	250	ponctuee	97.357	1.675585866699642
245	basse	39.104	264	basse	32.371	1.000201824105331
246	ponctuee	92.194	291	ponctuee	98.375	0
247	ponctuee	115.368	251	ponctuee	102.999	0.633494612302215
248	basse	53.931	254	ponctuee	31.157	0
249	basse	27.346	253	basse	35.476	3.395471730532432
250	basse	111.974	252	basse	47.848	2.631679353358841
251	haute	31.707	257	haute	38.906	0
252	ponctuee	17.182	256	ponctuee	26.642	0.769403629078021
253	ponctuee	55.55	0	vide	55.55	84.45209144839498
254	basse	51.844	0	vide	51.844	66.4596242372866
255	basse	37.059	0	vide	37.059	33.97941861702513
256	ponctuee	66.524	0	vide	66.524	19.18304412704588
257	haute	51.169	0	vide	51.169	1.409260186024607
258	haute	52.5	293	haute	51.511	0.220620752371702
259	alignement	97.676	0	vide	97.676	4.935113680738247
260	basse	34.819	292	ponctuee	37.676	1.012962557753727
261	ponctuee	52.027	0	vide	52.027	52.617671222942185
262	ponctuee	104.509	261	ponctuee	53.372	1.266083870852379
263	basse	174.594	259	ponctuee	185.682	0
264	ponctuee	95.412	0	vide	95.412	119.37470101777738
265	alignement	28.191	0	vide	28.191	76.27619773659285
266	haute	175.167	295	haute	183.261	0
267	ponctuee	40.402	296	haute	66.508	0.312269555649515
268	ponctuee	158.638	297	ponctuee	171.113	0
269	basse	100.653	214	haute	95.951	0
270	basse	88.121	299	basse	76.58	6.036712963403127
271	ponctuee	104.74	300	ponctuee	107.606	0
272	ponctuee	480.441	115	ponctuee	583.236	1.436516532066265
273	ponctuee	642.379	113	ponctuee	635.152	0
274	basse	63.004	0	vide	63.004	0
275	alignement	61.022	302	alignement	64.866	0
276	ponctuee	24.903	88	ponctuee	20.603	0
277	basse	38.513	135	basse	40.009	0
278	basse	45.499	60	basse	50.402	0
279	basse	46.471	0	vide	46.471	0
280	basse	52.046	137	basse	46.734	0
281	ponctuee	72.614	98	ponctuee	43.355	0
282	basse	35.826	221	ponctuee	33.019	0
283	basse	82.703	260	basse	172.807	0
284	vide	100.021	4	basse	100.021	0
285	vide	53.677	6	basse	53.677	0
286	vide	54.21	7	basse	54.21	0
287	vide	161.437	8	basse	161.437	0
288	vide	86.23	9	basse	86.23	0
289	vide	36.845	11	alignement	36.845	0
290	vide	109.222	13	ponctuee	109.222	0
291	vide	40.747	15	alignement	40.747	0
292	vide	102.989	16	alignement	102.989	0
293	vide	62.701	19	alignement	62.701	0
294	vide	88.579	20	alignement	88.579	0
295	vide	98.365	24	ponctuee	98.365	0
296	vide	67.113	27	ponctuee	67.113	0
297	vide	68.057	28	alignement	68.057	0
298	vide	50.175	36	ponctuee	50.175	0
299	vide	103.529	39	alignement	103.529	0
300	vide	98.024	40	alignement	98.024	0
301	vide	27.378	43	haute	27.378	0
302	vide	24.771	51	basse	24.771	0
303	vide	50.515	52	basse	50.515	0
304	vide	39.706	53	ponctuee	39.706	0
305	vide	105.765	61	basse	105.765	0
306	vide	23.463	62	basse	23.463	0
307	vide	130.285	71	ponctuee	130.285	0
308	vide	51.658	72	haute	51.658	0
309	vide	34.649	76	ponctuee	34.649	0
310	vide	72.845	77	basse	72.845	0
311	vide	79.259	78	ponctuee	79.259	0
312	vide	33.905	79	alignement	33.905	0
313	vide	85.45	81	ponctuee	85.45	0
314	vide	47.086	96	basse	47.086	0
315	vide	111.188	99	ponctuee	111.188	0
316	vide	121.408	102	basse	121.408	0
317	vide	60.71	117	basse	60.71	0
318	vide	54.775	118	ponctuee	54.775	0
319	vide	118.821	143	ponctuee	118.821	0
320	vide	62.24	144	ponctuee	62.24	0
321	vide	85.998	148	basse	85.998	0
322	vide	31.138	150	basse	31.138	0
323	vide	42.42	152	ponctuee	42.42	0
324	vide	81.767	156	ponctuee	81.767	0
325	vide	33.705	157	haute	33.705	0
326	vide	97.68	179	alignement	97.68	0
327	vide	64.013	180	ponctuee	64.013	0
328	vide	95.683	181	alignement	95.683	0
329	vide	43.81	184	basse	43.81	0
330	vide	56.362	186	basse	56.362	0
331	vide	48.961	189	basse	48.961	0
332	vide	76.175	191	basse	76.175	0
333	vide	22.069	197	basse	22.069	0
334	vide	72.112	198	ponctuee	72.112	0
335	vide	52.237	199	basse	52.237	0
336	vide	90.578	200	alignement	90.578	0
337	vide	84.504	202	basse	84.504	0
338	vide	70.483	210	haute	70.483	0
339	vide	236.976	211	alignement	236.976	0
340	vide	63.527	216	haute	63.527	0
341	vide	170.795	217	alignement	170.795	0
342	vide	51.975	218	ponctuee	51.975	0
343	vide	59.061	219	ponctuee	59.061	0
344	vide	60.2	222	basse	60.2	0
345	vide	27.528	225	ponctuee	27.528	0
346	vide	100.233	235	basse	100.233	0
347	vide	32.886	237	alignement	32.886	0
348	vide	156.14	242	haute	156.14	0
349	vide	64.635	247	ponctuee	64.635	0
350	vide	122.85	255	alignement	122.85	0
351	vide	52.124	258	alignement	52.124	0
352	vide	35.254	262	haute	35.254	0
353	vide	56.685	294	ponctuee	56.685	0
354	vide	70.518	298	haute	70.518	0
355	vide	55.488	303	ponctuee	55.488	0

## Sheet: 2000_2019
id	Type_haie	Longueur	join_fid	join_Type_	join_Longu	distance
1	ponctuee	129.752	3	ponctuee	102.89	3.856344643693295
2	ponctuee	108.34	0	vide	108.34	5.856145956543751
3	ponctuee	285.4	0	vide	285.4	13.475339175478267
4	basse	100.021	0	vide	100.021	7.711974179936822
5	ponctuee	312.843	350	ponctuee	185.492	1.607204569063187
6	basse	53.677	34	basse	59.683	6.144302643906074
7	basse	54.21	36	ponctuee	43.938	5.176090507747332
8	basse	161.437	37	basse	158.326	4.555323613754403
9	basse	86.23	38	basse	101.326	0.052168150660354
10	ponctuee	134.032	44	ponctuee	131.083	0
11	alignement	36.845	42	alignement	41.757	0
12	alignement	151.139	0	vide	151.139	189.9549393891466
13	ponctuee	109.222	24	haute	117.488	0.46927149985569
14	alignement	50.13	22	alignement	57.216	0
15	alignement	40.747	23	alignement	44.169	0
16	alignement	102.989	25	alignement	87.903	0
17	haute	38.345	0	vide	38.345	22.591603407957127
18	alignement	42.243	9	alignement	40.557	3.074017816663857
19	alignement	62.701	0	vide	62.701	16.4966139489213
20	alignement	88.579	20	alignement	82.8	2.744713179620192
21	haute	89.593	19	haute	97.034	0
22	alignement	79.225	11	alignement	83.733	0
23	ponctuee	106.381	12	haute	103.129	0
24	ponctuee	98.365	329	ponctuee	119.067	0
25	alignement	75.646	0	vide	75.646	95.48721396598405
26	ponctuee	93.663	57	haute	97.801	0
27	ponctuee	67.113	58	ponctuee	141.512	0.174106953056497
28	alignement	68.057	69	haute	71.493	1.331589349435992
29	alignement	85.465	67	ponctuee	141.209	0
30	alignement	63.985	66	ponctuee	114.28	0
31	basse	51.481	368	basse	61.178	0
32	basse	95.973	65	basse	50.838	0.78641738584725
33	haute	69.831	62	haute	76.834	1.049953091751974
34	basse	36.006	63	basse	37.403	1.19451302304419
35	ponctuee	156.107	115	ponctuee	159.376	0.018919223739537
36	ponctuee	50.175	116	ponctuee	37.402	0.043122112792679
37	basse	98.41	0	vide	98.41	72.21274149229795
38	ponctuee	87.783	101	haute	136.794	0
39	alignement	103.529	103	alignement	104.399	2.254731751788705
40	alignement	98.024	0	vide	98.024	1.86222140255373
41	basse	71.008	104	basse	62.906	0
42	haute	206.86	105	haute	139.496	0
43	haute	27.378	106	haute	34.301	1.292621689843436
44	haute	73.167	114	haute	47.38	1.044334757784963
45	alignement	37.938	107	alignement	41.285	0
46	ponctuee	80.724	108	haute	96.647	0.370008040341157
47	basse	38.608	99	basse	36.415	0
48	alignement	43.555	98	alignement	47.202	0.172732547156373
49	alignement	35.746	96	alignement	34.541	1.252273662076294
50	alignement	44.547	50	alignement	48.238	1.525268599921036
51	basse	24.771	47	haute	23.512	0.598774621169702
52	basse	50.515	48	ponctuee	50.527	0.557174151858921
53	ponctuee	39.706	28	haute	52.022	0
54	alignement	24.845	21	alignement	27.812	3.134570929121147
55	basse	115.165	10	ponctuee	140.352	0
56	haute	83.629	55	haute	84.415	0
57	haute	103.518	54	haute	99.598	0
58	basse	70.074	18	ponctuee	69.356	0.470910827530195
59	ponctuee	43.474	71	ponctuee	54.293	0
60	basse	50.402	53	haute	52.362	0
61	basse	105.765	109	ponctuee	108.243	1.118750280059708
62	basse	23.463	331	ponctuee	45.255	0
63	ponctuee	55.508	332	haute	62.038	0
64	ponctuee	90.607	72	ponctuee	63.46	0
65	haute	42.043	89	haute	66.296	0.0587403684955
66	ponctuee	138.067	85	haute	218.372	0
67	ponctuee	43.221	334	ponctuee	34.028	1.19454088686948
68	haute	94.733	0	vide	94.733	18.418441186325346
69	basse	103.763	0	vide	103.763	103.37995482768251
70	ponctuee	115.506	78	haute	38.61	0
71	ponctuee	130.285	81	ponctuee	193.97	0
72	haute	51.658	0	vide	51.658	36.92060390204358
73	ponctuee	68.274	76	ponctuee	66.672	0
74	haute	92.78	77	haute	92.883	0.539180702431017
75	alignement	40.841	323	alignement	40.847	0.783609726631372
76	ponctuee	34.649	319	haute	29.537	1.707394761905795
77	basse	72.845	369	ponctuee	39.111	4.53013963110129
78	ponctuee	79.259	320	ponctuee	97.117	0
79	alignement	33.905	308	ponctuee	70.631	0.155724710216009
80	basse	110.213	0	vide	110.213	103.53115965263972
81	ponctuee	85.45	309	haute	64.563	0.478259552298076
82	basse	148.558	307	ponctuee	157.861	0
83	ponctuee	38.826	306	ponctuee	55.692	0
84	basse	43.187	305	basse	105.543	0
85	haute	60.961	303	haute	53.796	1.454066660096148
86	basse	47.104	0	vide	47.104	69.2972017964507
87	ponctuee	113.787	94	haute	113.499	0
88	ponctuee	20.603	93	ponctuee	20.286	1.840005068421066
89	basse	49.276	0	vide	49.276	33.756134215646945
90	alignement	72.008	302	alignement	74.052	0
91	ponctuee	77.355	301	ponctuee	99.323	0
92	ponctuee	38.673	0	vide	38.673	75.8854810363374
93	ponctuee	64.223	0	vide	64.223	8.072605779323103
94	ponctuee	78.676	0	vide	78.676	8.894088795797943
95	haute	18.505	335	haute	11.825	0.814754364417338
96	basse	47.086	293	basse	52.279	1.35505539578847
97	basse	135.859	292	basse	76.134	0
98	ponctuee	43.355	291	ponctuee	94.802	0
99	ponctuee	111.188	313	ponctuee	64.507	0.022637222036591
100	haute	48.097	0	vide	48.097	114.79686246130517
101	basse	131.592	190	haute	135.827	0
102	basse	121.408	189	basse	129.676	1.676425854825123
103	haute	89.295	188	haute	82.523	0
104	basse	76.109	187	ponctuee	68.158	0.430562023685866
105	basse	66.94	336	ponctuee	83.579	3.123412761357226
106	basse	465.131	186	basse	502.895	0
107	ponctuee	356.755	219	ponctuee	345.324	0
108	ponctuee	32.216	218	haute	36.665	0.489331977178814
109	basse	35.378	0	vide	35.378	73.8366071647698
110	alignement	51.557	213	alignement	47.366	0.042099171785108
111	basse	193.224	182	haute	203.075	0
112	basse	121.436	181	haute	118.999	0
113	ponctuee	635.152	199	ponctuee	40.775	0
114	ponctuee	157.785	180	haute	155.732	2.868121183466502
115	ponctuee	583.236	179	haute	577.711	0
116	ponctuee	846.933	201	ponctuee	837.198	0
117	basse	60.71	183	haute	48.467	0
118	ponctuee	54.775	185	ponctuee	292.432	0
119	alignement	273.897	315	ponctuee	264.579	0
120	alignement	20.245	197	alignement	18.502	0
121	alignement	99.648	196	alignement	97.423	0.233669938946042
122	basse	141.882	195	ponctuee	140.384	1.895499944306162
123	ponctuee	165.173	202	ponctuee	178.829	0.649770625890244
124	basse	37.359	0	vide	37.359	23.666444399215504
125	alignement	34.828	198	alignement	37.892	0.41101471670282
126	haute	110.513	194	haute	84.004	0
127	haute	86.355	192	haute	76.742	0
128	haute	99.782	191	haute	110.212	0
129	haute	67.531	337	haute	83.675	0.206319088659468
130	haute	95.919	0	vide	95.919	31.032061433707966
131	ponctuee	81.101	0	vide	81.101	17.701326661931496
132	basse	33.295	215	basse	30.246	0.042363278626758
133	basse	192.596	216	basse	131.209	0.537066985819264
134	basse	46.336	0	vide	46.336	4.436636830140327
135	basse	40.009	0	vide	40.009	6.011892470630023
136	haute	55.759	217	haute	56.531	0.45256462216369
137	basse	46.734	0	vide	46.734	118.34113694739688
138	ponctuee	274.806	228	ponctuee	271.767	0
139	ponctuee	191.264	230	ponctuee	37.642	0
140	ponctuee	98.918	233	haute	107.164	0
141	ponctuee	75.897	234	basse	81.84	1.587759714031571
142	basse	148.93	236	basse	149.62	0
143	ponctuee	118.821	237	haute	120.046	0.482623575643577
144	ponctuee	62.24	239	ponctuee	62.514	0
145	ponctuee	181.808	235	ponctuee	182.946	0
146	alignement	49.608	240	alignement	52.414	0
147	ponctuee	142.138	241	ponctuee	162.582	0
148	basse	85.998	338	basse	68.983	1.465157127455911
149	basse	118.153	220	basse	108.768	0
150	basse	31.138	223	basse	34.662	0.444052702380955
151	basse	25.426	227	basse	35.559	0
152	ponctuee	42.42	229	ponctuee	40.924	0.533471609441579
153	basse	159.847	242	basse	107.599	0
154	ponctuee	97.17	244	ponctuee	131.408	0
155	basse	103.124	245	basse	98.576	0
156	ponctuee	81.767	256	ponctuee	80.207	0.785273364421373
157	haute	33.705	249	haute	31.568	1.990306148386273
158	ponctuee	104.44	252	ponctuee	104.673	0
159	haute	364.507	251	haute	376.171	0
160	ponctuee	110.284	253	ponctuee	284.711	0
161	ponctuee	50.506	171	haute	61.884	0.086417791581836
162	basse	108.63	164	ponctuee	70.477	0
163	haute	69.722	163	haute	51.784	0.569675444759475
164	ponctuee	83.229	0	vide	83.229	116.90962089916125
165	basse	28.908	0	vide	28.908	67.79038405349897
166	haute	42.867	161	haute	48.491	0
167	basse	93.156	162	haute	104.269	0
168	basse	37.763	156	ponctuee	68.693	0
169	basse	77.491	158	basse	79.362	0
170	haute	66.111	357	haute	59.862	0
171	ponctuee	48.373	160	haute	80.025	1.39504637688258
172	haute	69.206	173	haute	75.59	0
173	haute	28.285	174	haute	27.34	0
174	basse	63.753	166	haute	71.95	0
175	haute	90.195	167	haute	74.877	0
176	ponctuee	65.495	0	vide	65.495	18.412746278121194
177	basse	50.446	175	basse	59.227	0
178	alignement	85.994	311	basse	73.624	0
179	alignement	97.68	327	alignement	103.526	0
180	ponctuee	64.013	312	ponctuee	76.398	0
181	alignement	95.683	328	alignement	80.695	0
182	ponctuee	230.297	246	ponctuee	198.171	0
183	basse	87.461	248	basse	98.753	0
184	basse	43.81	254	ponctuee	39.435	0
185	ponctuee	64.59	261	ponctuee	212.561	0
186	basse	56.362	339	ponctuee	38.59	0
187	ponctuee	144.347	257	ponctuee	159.239	0
188	basse	96.94	258	basse	107.206	0
189	basse	48.961	0	vide	48.961	5.454156485528133
190	ponctuee	128.237	259	haute	126.499	0
191	basse	76.175	262	ponctuee	79.151	0
192	alignement	32.512	325	alignement	23.705	0.917576598926268
193	alignement	47.678	263	alignement	44.512	0
194	haute	119.736	0	vide	119.736	59.343399626525844
195	haute	112.463	0	vide	112.463	15.33435370275278
196	ponctuee	47.103	0	vide	47.103	129.13715300802448
197	basse	22.069	370	basse	24.207	158.6056795033596
198	ponctuee	72.112	260	ponctuee	107.525	0
199	basse	52.237	324	ponctuee	53.45	0.60067889966269
200	alignement	90.578	210	alignement	89.783	0
201	alignement	84.543	266	alignement	79.053	0
202	basse	84.504	265	ponctuee	73.396	0.214981603959469
203	basse	42.157	264	ponctuee	68.142	0
204	ponctuee	119.924	268	haute	88.114	0
205	haute	143.803	277	haute	160.283	0
206	ponctuee	163.614	0	vide	163.614	4.506870618165575
207	ponctuee	188.326	282	ponctuee	148.867	0
208	haute	499.507	281	haute	477.463	0
209	haute	95.181	340	haute	89.689	0
210	haute	70.483	274	haute	74.066	0
211	alignement	236.976	273	alignement	268.665	0
212	alignement	79.186	279	alignement	107.193	0
213	haute	375.601	271	haute	353.097	0
214	haute	95.951	290	haute	80.934	0
215	haute	50.477	272	haute	47.488	0
216	haute	63.527	316	haute	102.552	1.158071737695614
217	alignement	170.795	278	alignement	176.136	0
218	ponctuee	51.975	289	haute	30.748	0.077337685743826
219	ponctuee	59.061	341	haute	63.591	0
220	haute	138.791	280	haute	148.838	0
221	ponctuee	33.019	318	ponctuee	34.704	0.750598367502287
222	basse	60.2	296	ponctuee	74.008	0.673478959752395
223	basse	31.142	0	vide	31.142	37.38320126381811
224	alignement	63.678	314	alignement	73.498	0
225	ponctuee	27.528	0	vide	27.528	121.51840785725939
226	haute	85.522	342	haute	93.029	0
227	haute	55.414	343	haute	63.7	0.290151550523708
228	ponctuee	41.829	0	vide	41.829	8.10043416540928
229	haute	38.108	155	haute	42.703	0
230	ponctuee	235.749	153	ponctuee	154.546	0
231	ponctuee	67.681	149	haute	70.343	0
232	ponctuee	32.04	0	vide	32.04	16.087842034086655
233	ponctuee	125.306	141	haute	129.341	0
234	ponctuee	67.564	142	haute	69.091	0
235	basse	100.233	136	basse	64.877	0
236	ponctuee	51.097	138	haute	31.908	0
237	alignement	32.886	140	alignement	39.095	1.512893537150343
238	haute	78.056	139	haute	124.673	0
239	ponctuee	89.011	137	ponctuee	92.254	0.038007105430697
240	ponctuee	97.388	145	ponctuee	70.03	0
241	haute	82.316	147	haute	82.63	0
242	haute	156.14	0	vide	156.14	27.684889176109344
243	basse	42.207	285	haute	57.553	0
244	haute	312.053	283	haute	313.935	0
245	ponctuee	51.58	288	haute	45.172	0.087007534803276
246	ponctuee	54.387	344	ponctuee	50.605	0.823143357098713
247	ponctuee	64.635	286	haute	95.59	0.502481764976923
248	basse	34.541	148	ponctuee	111.588	0.234285255389895
249	ponctuee	88.357	345	haute	91.781	0
250	ponctuee	97.357	347	haute	174.18	0
251	ponctuee	102.999	131	ponctuee	103.743	0
252	basse	47.848	127	alignement	62.284	0
253	basse	35.476	128	haute	35.702	0
254	ponctuee	31.157	130	haute	32.424	2.602075999464139
255	alignement	122.85	129	alignement	122.651	0
256	ponctuee	26.642	126	ponctuee	150.019	0
257	haute	38.906	125	haute	23.43	0.748246527725656
258	alignement	52.124	346	alignement	48.729	1.32752430110159
259	ponctuee	185.682	119	ponctuee	176.912	0
260	basse	172.807	124	basse	193.382	0
261	ponctuee	53.372	120	haute	78.324	0
262	haute	35.254	0	vide	35.254	74.73373259338175
263	ponctuee	91.081	112	ponctuee	41.843	1.275172132251419
264	basse	32.371	132	ponctuee	37.103	0.182668563226336
265	ponctuee	63.113	348	haute	62.855	0
266	ponctuee	76.818	349	ponctuee	79.216	0
267	haute	56.136	0	vide	56.136	8.454290683191008
268	ponctuee	62.614	0	vide	62.614	23.44995231139637
269	ponctuee	182.013	351	ponctuee	175.776	0
270	ponctuee	103.429	0	vide	103.429	72.5321110628178
271	ponctuee	200.09	352	haute	196.529	0
272	haute	32.129	0	vide	32.129	53.06590801119439
273	haute	27.093	0	vide	27.093	3.258550026397354
274	haute	99.551	353	basse	51.727	0.086717712622219
275	ponctuee	44.797	354	haute	39.377	0
276	basse	59.01	310	ponctuee	55.518	0
277	ponctuee	71.157	355	ponctuee	73.141	0
278	ponctuee	79.177	0	vide	79.177	68.22220572047388
279	ponctuee	48.517	356	ponctuee	65.91	0
280	basse	29.877	0	vide	29.877	8.508202577621276
281	ponctuee	68.794	0	vide	68.794	5.788530478186995
282	basse	86.668	157	basse	139.078	0
283	haute	122.526	358	haute	82.265	4.361805345871928
284	basse	34.853	359	basse	32.616	1.169735473910986
285	ponctuee	33.25	0	vide	33.25	86.74047429782337
286	ponctuee	53.54	0	vide	53.54	55.174240310909234
287	ponctuee	39.127	0	vide	39.127	27.759598526267563
288	basse	28.366	371	ponctuee	24.219	114.96891837719652
289	basse	26.807	0	vide	26.807	109.7416963507899
290	basse	36.446	159	ponctuee	38.274	0
291	ponctuee	98.375	360	ponctuee	102.177	0
292	ponctuee	37.676	0	vide	37.676	43.59042191819591
293	haute	51.511	0	vide	51.511	9.142104173880131
294	ponctuee	56.685	361	haute	67.017	0
295	haute	183.261	362	haute	184.535	0
296	haute	66.508	363	haute	72.233	0
297	ponctuee	171.113	364	haute	176.489	0
298	haute	70.518	365	haute	54.039	0
299	basse	76.58	35	ponctuee	78.74	0
300	ponctuee	107.606	367	ponctuee	103.187	0
301	ponctuee	111.717	111	ponctuee	108.063	1.390462681711819
302	alignement	64.866	64	alignement	68.531	0
303	ponctuee	55.488	208	ponctuee	84.817	0
304	vide	13.385	1	alignement	13.385	0
305	vide	44.702	2	ponctuee	44.702	0
306	vide	151.32	4	alignement	151.32	0
307	vide	172.495	5	alignement	172.495	0
308	vide	32.575	6	alignement	32.575	0
309	vide	35.307	7	basse	35.307	0
310	vide	18.497	8	basse	18.497	0
311	vide	195.527	13	ponctuee	195.527	0
312	vide	25.6	14	alignement	25.6	0
313	vide	133.703	15	ponctuee	133.703	0
314	vide	82.548	16	ponctuee	82.548	0
315	vide	82.158	17	haute	82.158	0
316	vide	46.079	26	haute	46.079	0
317	vide	43.849	27	haute	43.849	0
318	vide	134.909	29	ponctuee	134.909	0
319	vide	89.905	30	ponctuee	89.905	0
320	vide	43.744	31	basse	43.744	0
321	vide	58.528	32	ponctuee	58.528	0
322	vide	14.865	33	basse	14.865	0
323	vide	26.712	39	basse	26.712	0
324	vide	88.848	40	ponctuee	88.848	0
325	vide	184.218	41	haute	184.218	0
326	vide	50.075	43	ponctuee	50.075	0
327	vide	98.665	45	ponctuee	98.665	0
328	vide	271.705	46	basse	271.705	0
329	vide	110.746	49	ponctuee	110.746	0
330	vide	104.048	51	ponctuee	104.048	0
331	vide	40.79	52	ponctuee	40.79	0
332	vide	29.457	56	basse	29.457	0
333	vide	51.825	59	ponctuee	51.825	0
334	vide	50.868	60	ponctuee	50.868	0
335	vide	12.812	61	basse	12.812	0
336	vide	88.91	68	basse	88.91	0
337	vide	34.924	70	basse	34.924	0
338	vide	155.407	73	ponctuee	155.407	0
339	vide	137.718	74	ponctuee	137.718	0
340	vide	67.001	75	ponctuee	67.001	0
341	vide	163.953	79	haute	163.953	0
342	vide	18.285	80	ponctuee	18.285	0
343	vide	62.057	82	ponctuee	62.057	0
344	vide	52.433	83	basse	52.433	0
345	vide	35.773	84	alignement	35.773	0
346	vide	89.865	86	ponctuee	89.865	0
347	vide	114.477	87	alignement	114.477	0
348	vide	103.974	88	alignement	103.974	0
349	vide	114.785	90	basse	114.785	0
350	vide	132.451	91	basse	132.451	0
351	vide	149.566	92	basse	149.566	0
352	vide	26.327	95	haute	26.327	0
353	vide	60.851	97	ponctuee	60.851	0
354	vide	80.755	100	basse	80.755	0
355	vide	90.515	102	basse	90.515	0
356	vide	42.411	110	ponctuee	42.411	0
357	vide	157.12	113	alignement	157.12	0
358	vide	61.006	117	basse	61.006	0
359	vide	58.888	118	haute	58.888	0
360	vide	34.228	121	basse	34.228	0
361	vide	106.168	122	basse	106.168	0
362	vide	41.01	123	basse	41.01	0
363	vide	31.337	133	ponctuee	31.337	0
364	vide	45.338	134	haute	45.338	0
365	vide	50.835	135	haute	50.835	0
366	vide	40.937	143	basse	40.937	0
367	vide	41.421	144	ponctuee	41.421	0
368	vide	66.568	146	basse	66.568	0
369	vide	52.674	150	haute	52.674	0
370	vide	24.367	151	basse	24.367	0
371	vide	81.614	152	basse	81.614	0
372	vide	120.027	154	ponctuee	120.027	0
373	vide	66.334	165	basse	66.334	0
374	vide	56.503	168	ponctuee	56.503	0
375	vide	47.214	169	basse	47.214	0
376	vide	34.031	170	ponctuee	34.031	0
377	vide	20.905	172	basse	20.905	0
378	vide	50.715	176	basse	50.715	0
379	vide	38.845	177	basse	38.845	0
380	vide	103.282	178	basse	103.282	0
381	vide	74.94	184	ponctuee	74.94	0
382	vide	82.625	193	ponctuee	82.625	0
383	vide	34.648	200	basse	34.648	0
384	vide	62.552	203	ponctuee	62.552	0
385	vide	33.582	204	basse	33.582	0
386	vide	88.714	205	ponctuee	88.714	0
387	vide	134.51	206	ponctuee	134.51	0
388	vide	124.417	207	alignement	124.417	0
389	vide	161.288	209	alignement	161.288	0
390	vide	23.827	211	basse	23.827	0
391	vide	47.237	212	ponctuee	47.237	0
392	vide	83.369	214	ponctuee	83.369	0
393	vide	34.213	221	ponctuee	34.213	0
394	vide	48.905	222	basse	48.905	0
395	vide	29.693	224	basse	29.693	0
396	vide	18.468	225	basse	18.468	0
397	vide	54.214	226	basse	54.214	0
398	vide	37.146	231	basse	37.146	0
399	vide	108.483	232	ponctuee	108.483	0
400	vide	49.07	238	ponctuee	49.07	0
401	vide	106.714	243	ponctuee	106.714	0
402	vide	24.443	247	haute	24.443	0
403	vide	57.305	250	ponctuee	57.305	0
404	vide	27.167	255	alignement	27.167	0
405	vide	33.038	267	basse	33.038	0
406	vide	31.306	269	basse	31.306	0
407	vide	85.623	270	basse	85.623	0
408	vide	74.281	275	alignement	74.281	0
409	vide	74.908	276	alignement	74.908	0
410	vide	73.826	284	basse	73.826	0
411	vide	119.89	287	basse	119.89	0
412	vide	66.423	294	basse	66.423	0
413	vide	59.425	295	ponctuee	59.425	0
414	vide	38.709	297	basse	38.709	0
415	vide	39.429	298	ponctuee	39.429	0
416	vide	58.777	299	basse	58.777	0
417	vide	57.2	300	basse	57.2	0
418	vide	111.414	304	ponctuee	111.414	0
419	vide	35.306	317	haute	35.306	0
420	vide	46.508	321	alignement	46.508	0
421	vide	18.184	322	alignement	18.184	0
422	vide	140.595	326	ponctuee	140.595	0
423	vide	32.062	330	alignement	32.062	0
424	vide	42.656	333	ponctuee	42.656	0
425	vide	21.734	366	ponctuee	21.734	0
