# Supplementary figures and images for: Integrating adaptation pathways and Ostrom’s framework for sustainable governance of social-ecological systems in a changing world
Source: PeerJ journal article supplement (doi:10.7717/peerj.18938), 2025-02-24

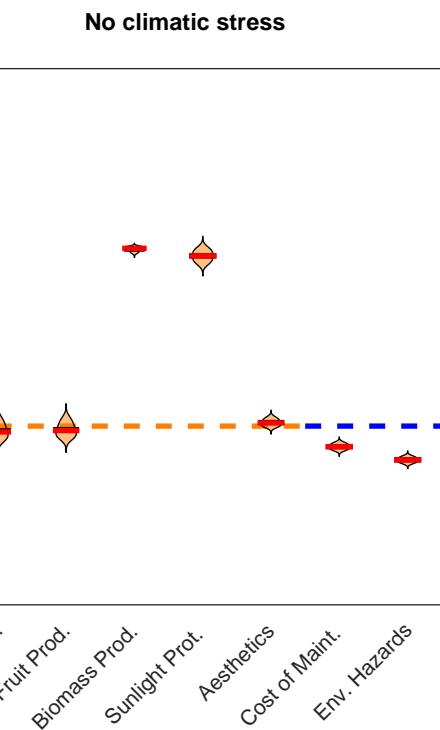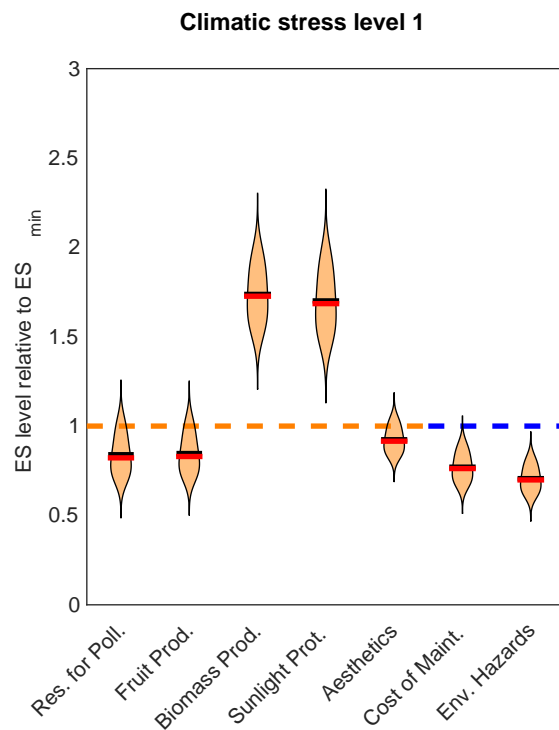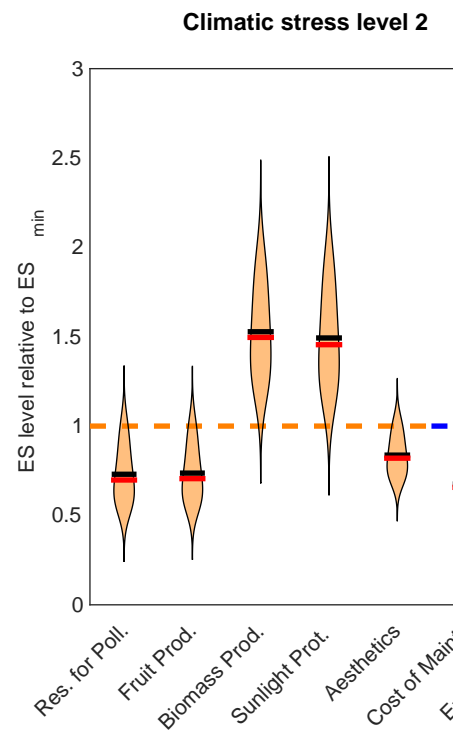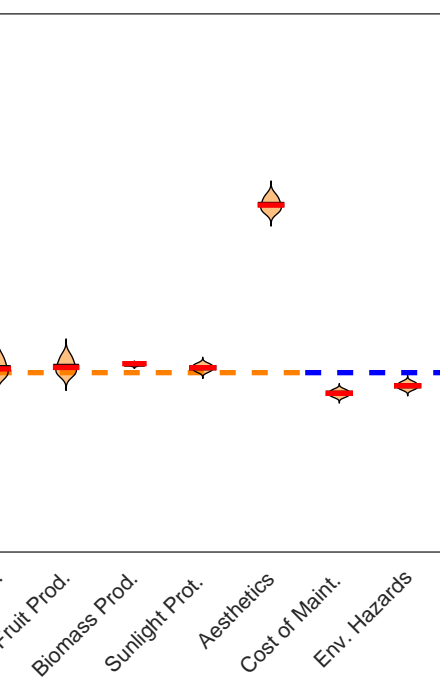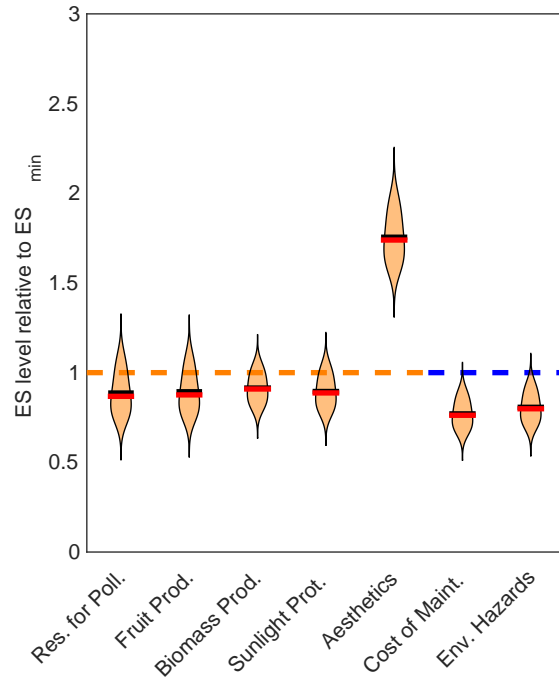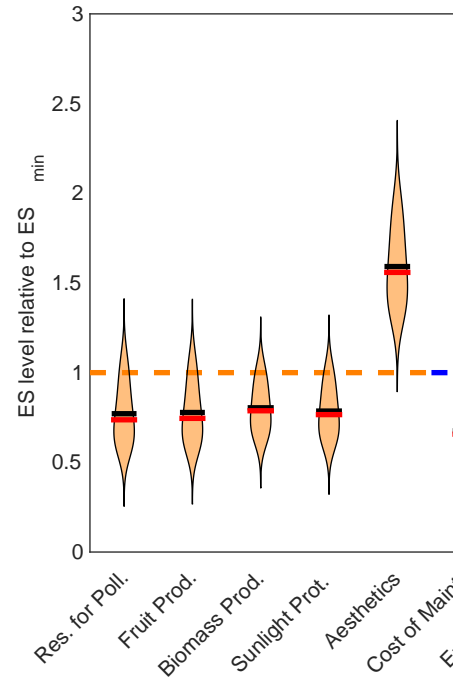

Supplement: FileS4.zip [file violin_full_scen_1.pdf › PACSEN-main/figures/figures_annexe/violin_full_scen_1.pdf]

No climatic stress

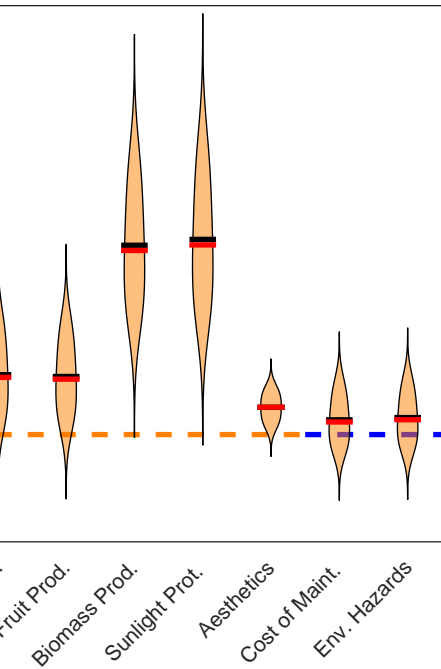

Climatic stress level 1

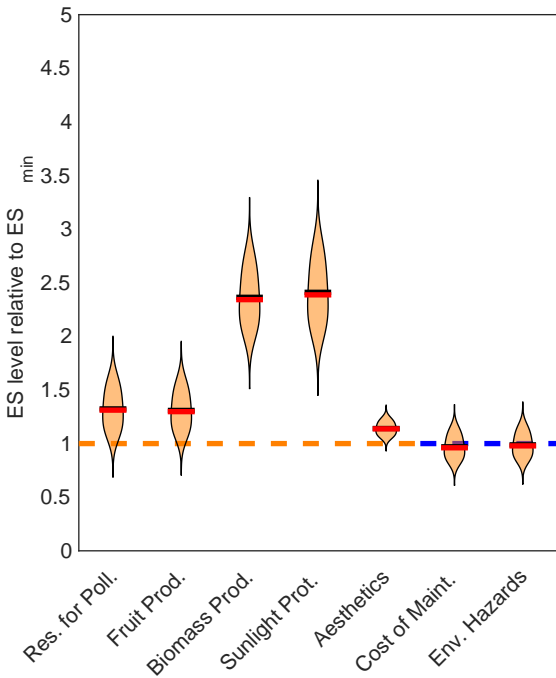

Climatic stress level 2

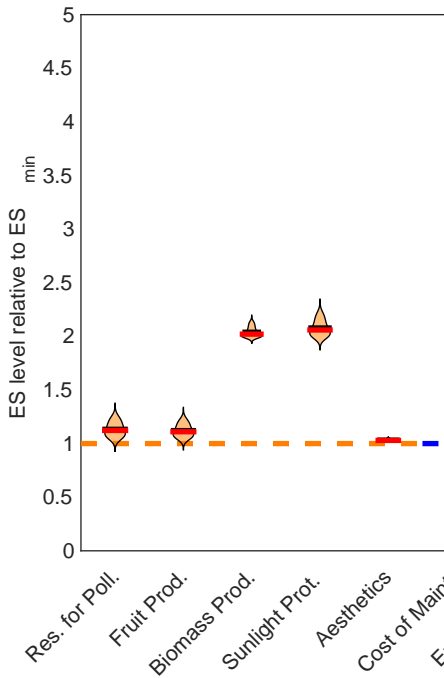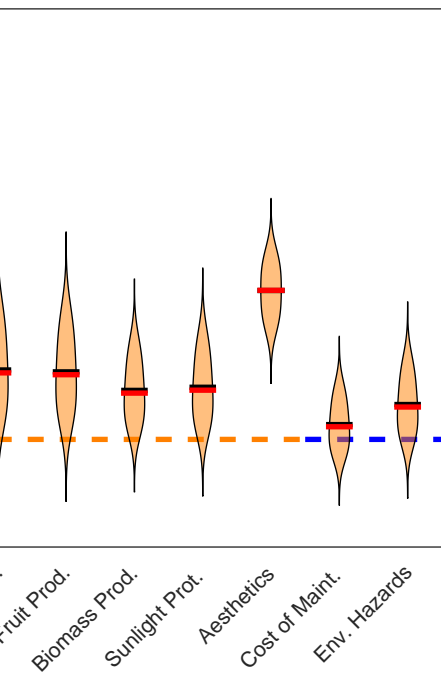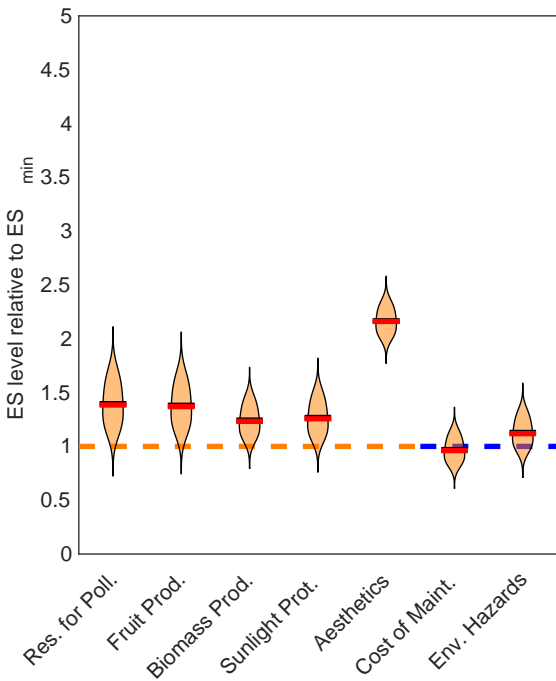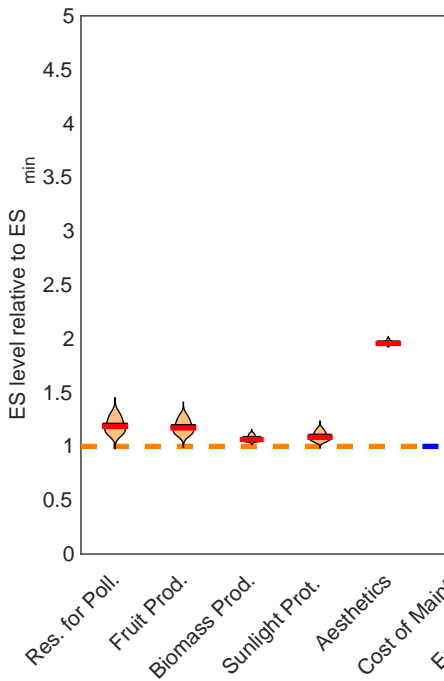

Supplement: FileS4.zip [file violin_full_scen_2.pdf › PACSEN-main/figures/figures_annexe/violin_full_scen_2.pdf]

No climatic stress

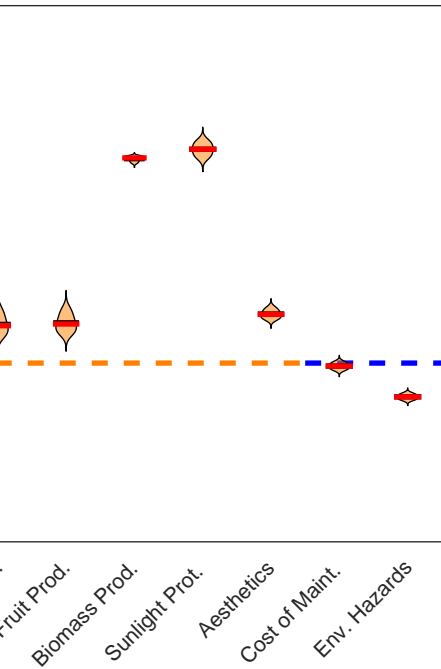

Climatic stress level 1

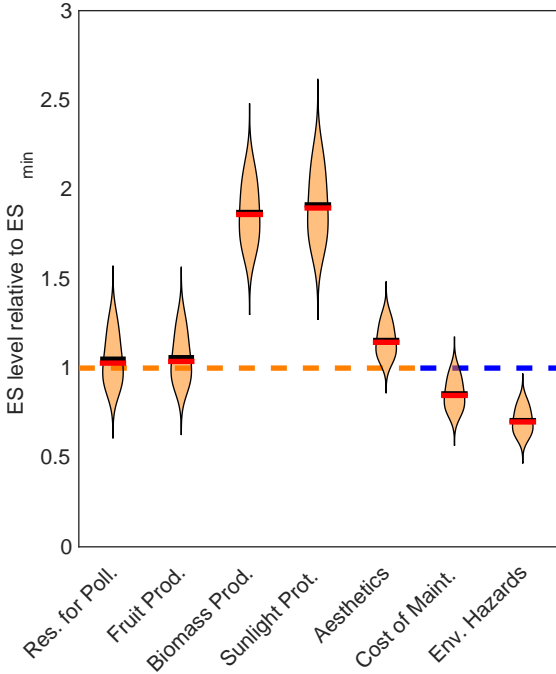

Climatic stress level 2

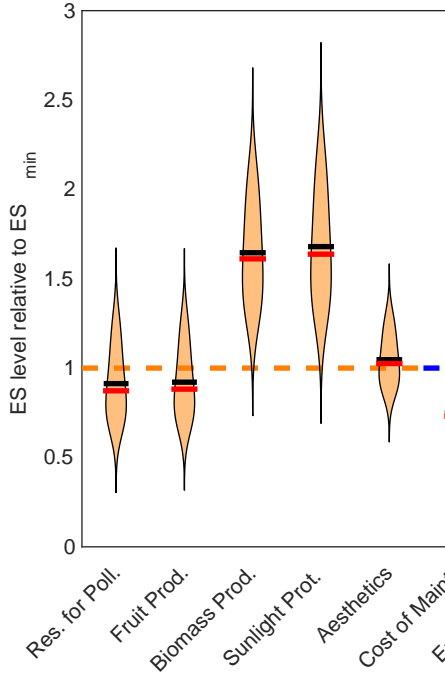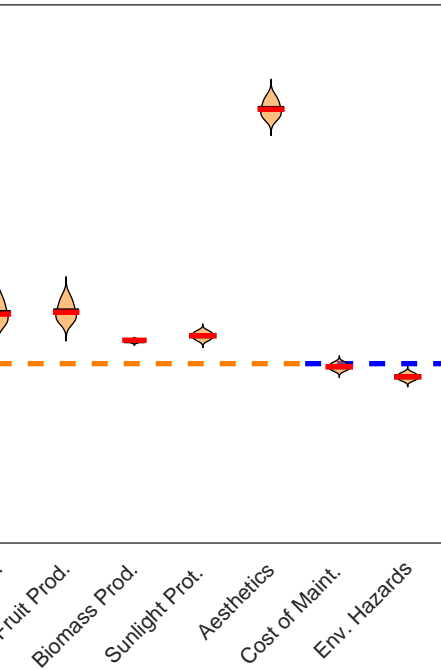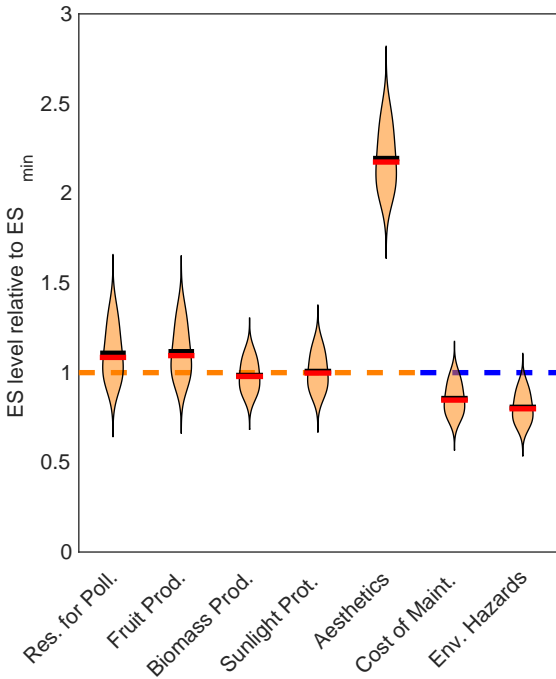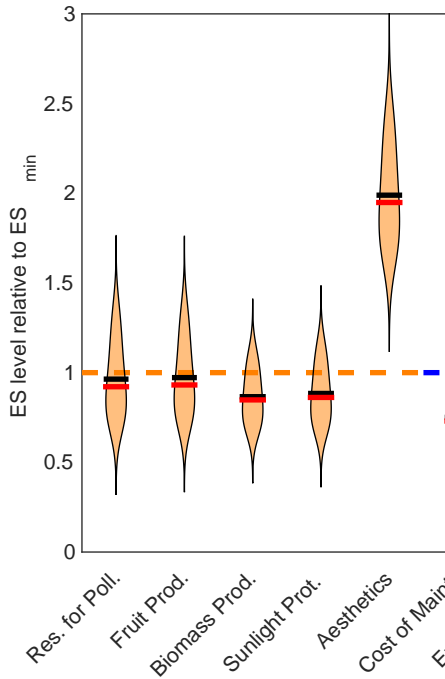

Supplement: FileS4.zip [file violin_full_scen_3.pdf › PACSEN-main/figures/figures_annexe/violin_full_scen_3.pdf]

No climatic stress

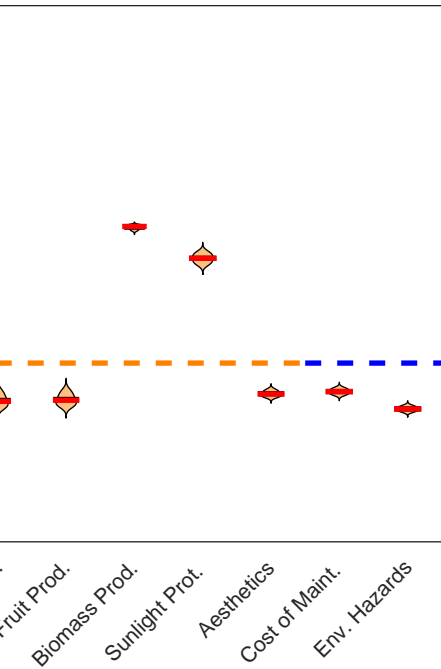

Climatic stress level 1

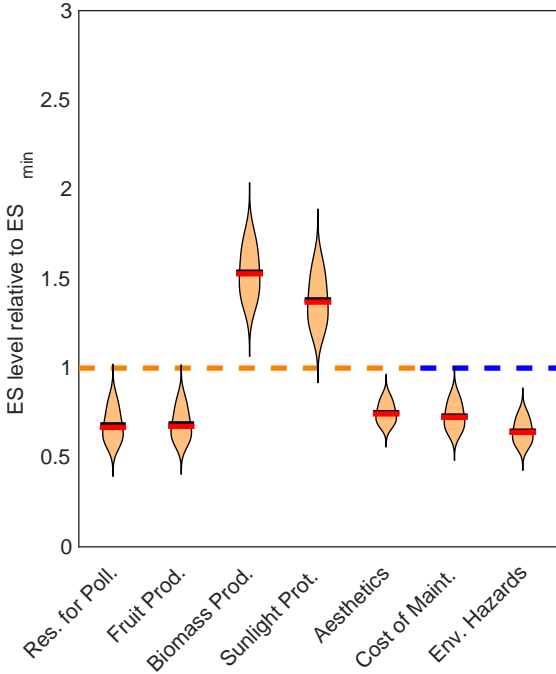

Climatic stress level 2

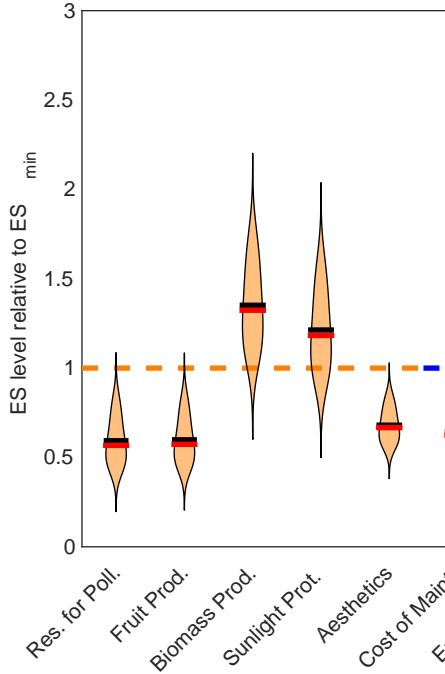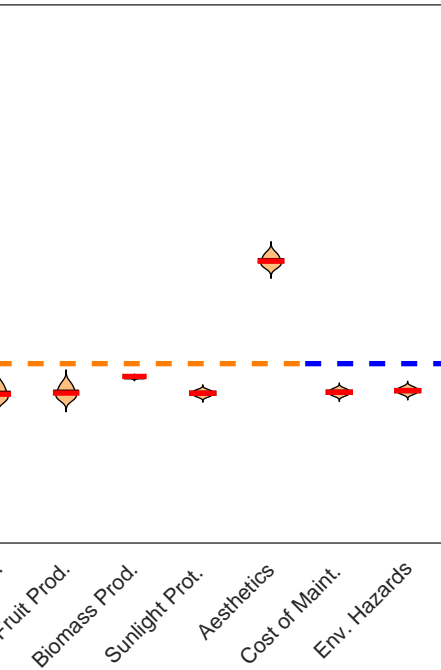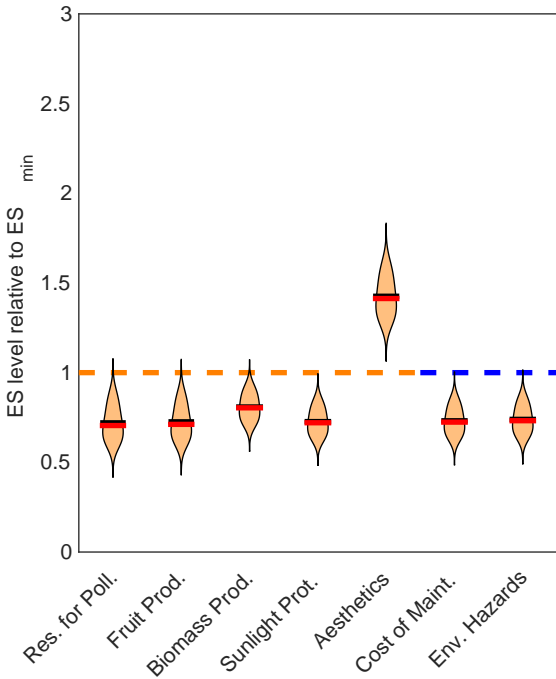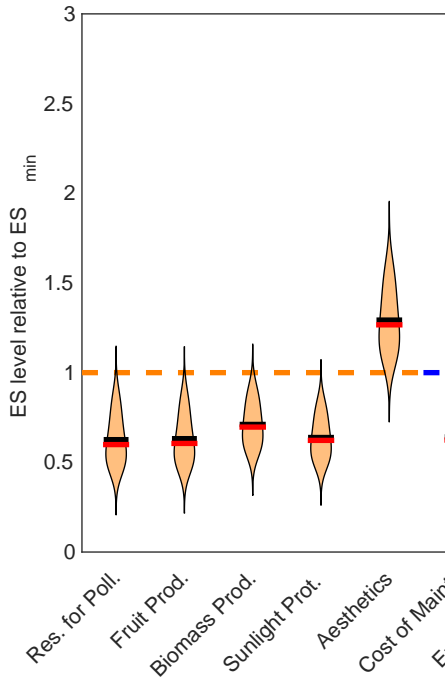

Supplement: FileS4.zip [file violin_full_scen_4.pdf › PACSEN-main/figures/figures_annexe/violin_full_scen_4.pdf]

No climatic stress

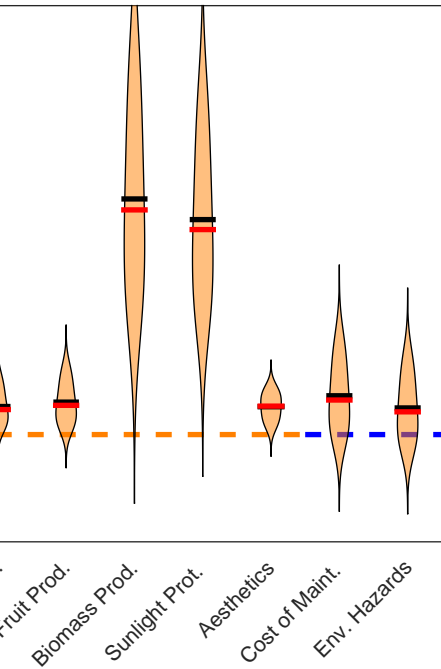

Climatic stress level 1

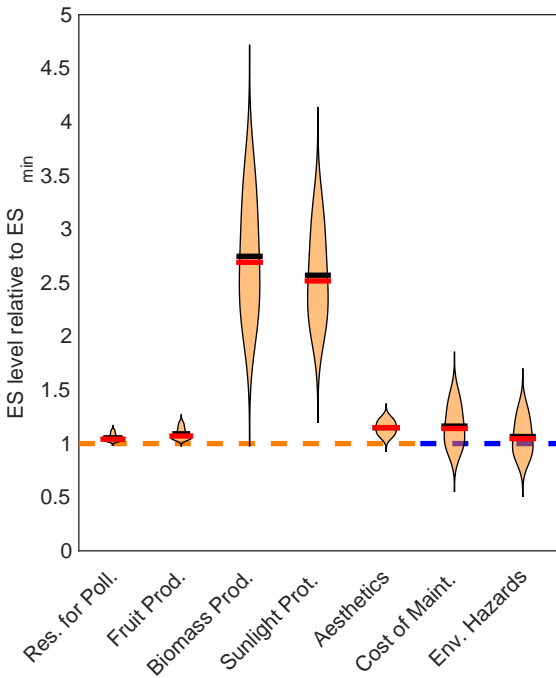

Climatic stress level 2

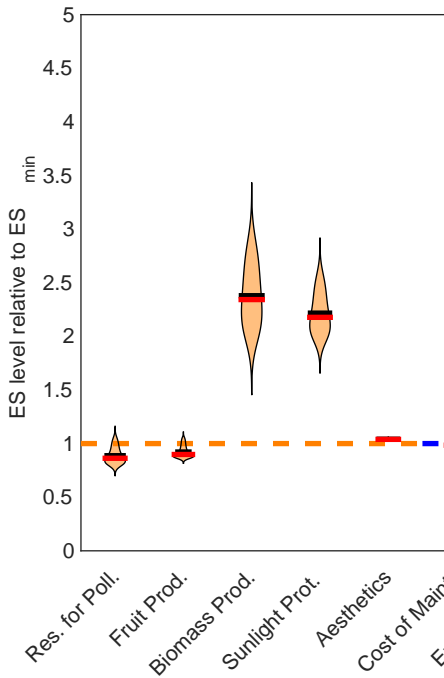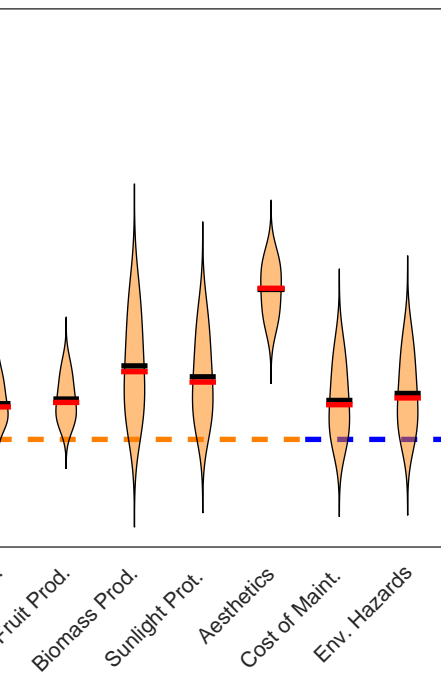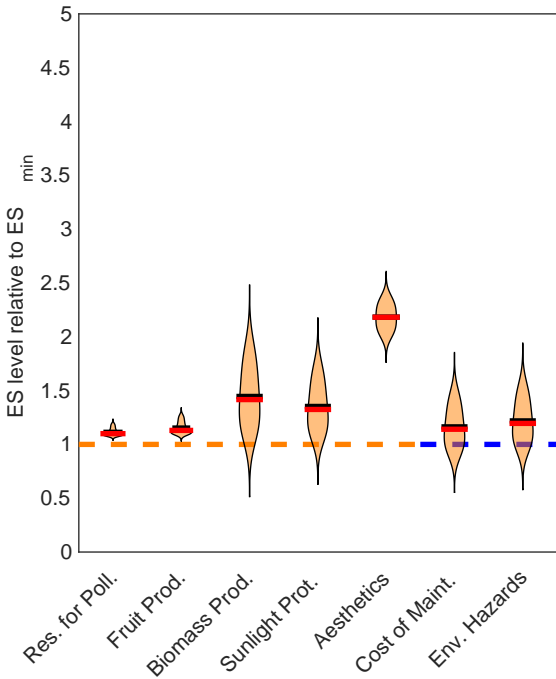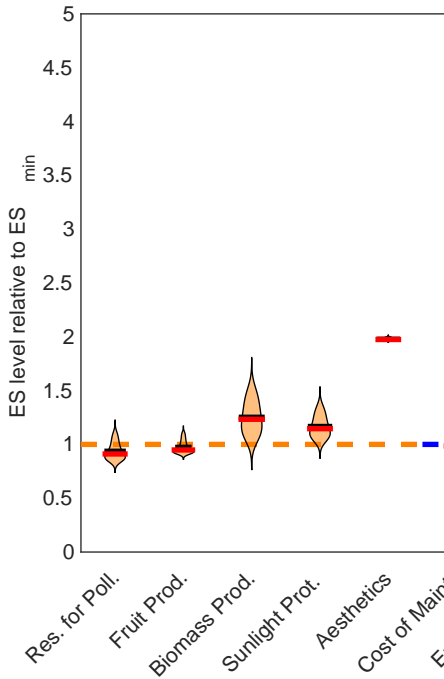

Supplement: FileS4.zip [file violin_full_scen_5.pdf › PACSEN-main/figures/figures_annexe/violin_full_scen_5.pdf]

No climatic stress

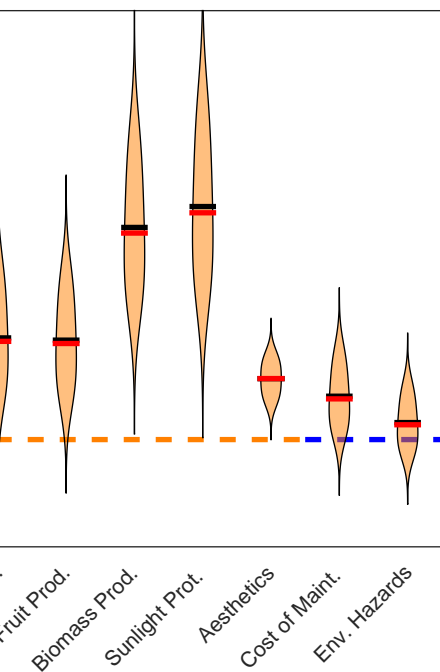

Climatic stress level 1

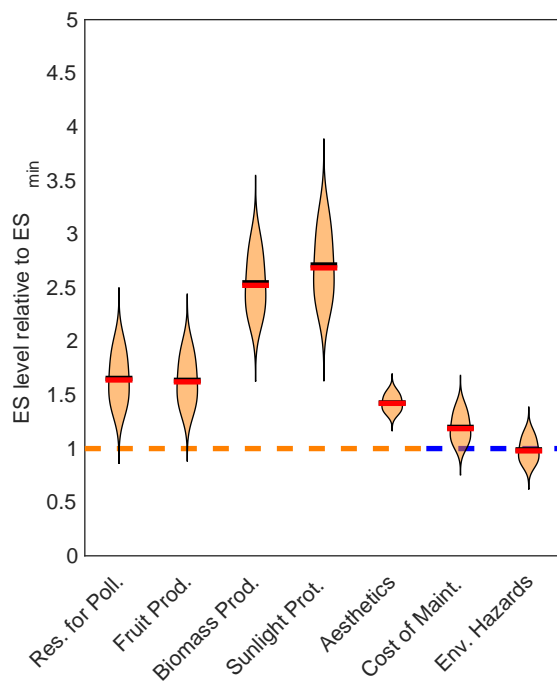

Climatic stress level 2

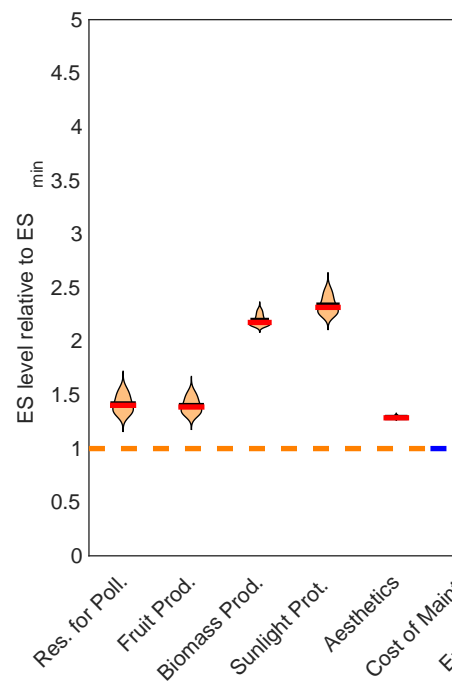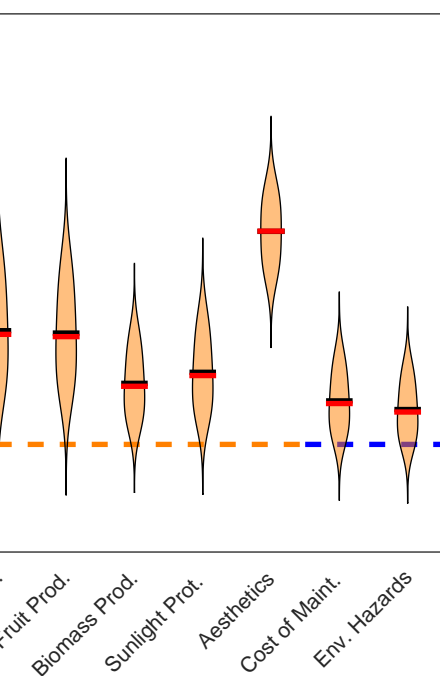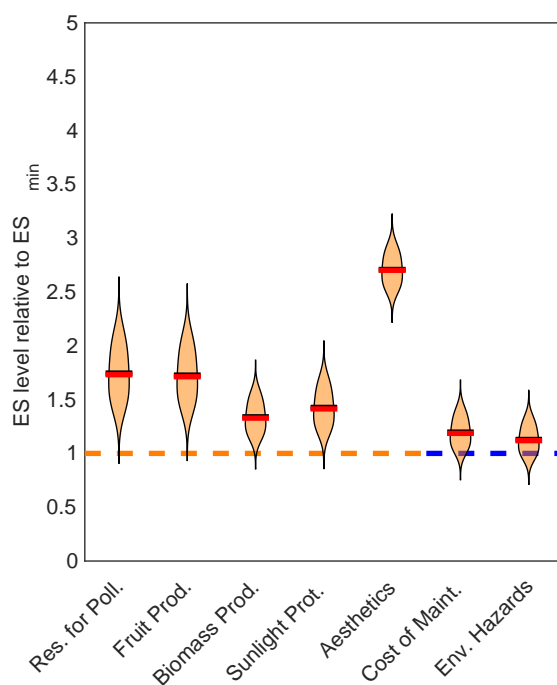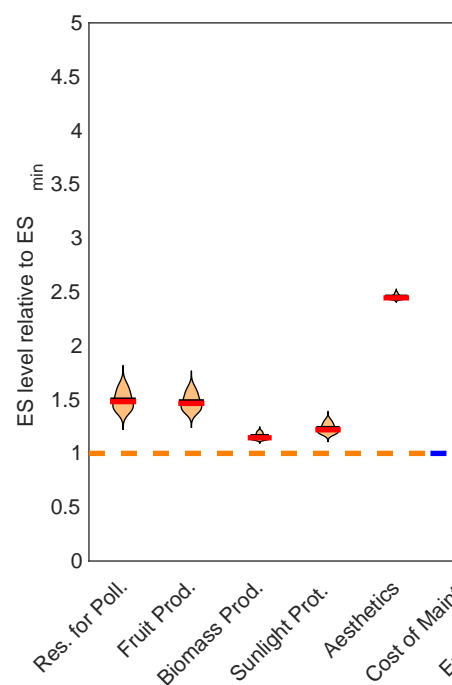

Supplement: FileS4.zip [file violin_full_scen_6.pdf › PACSEN-main/figures/figures_annexe/violin_full_scen_6.pdf]

No climatic stress

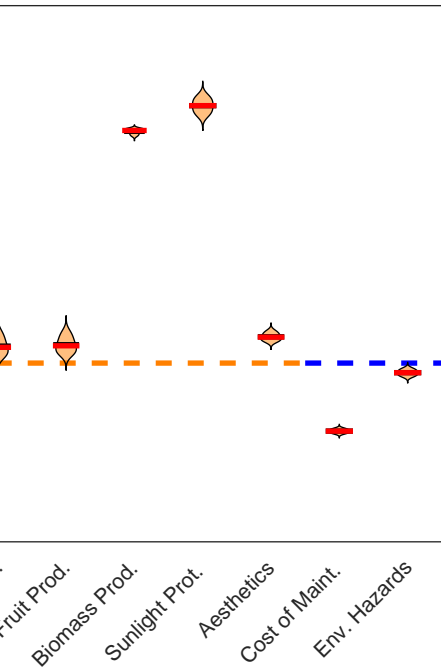

Climatic stress level 1

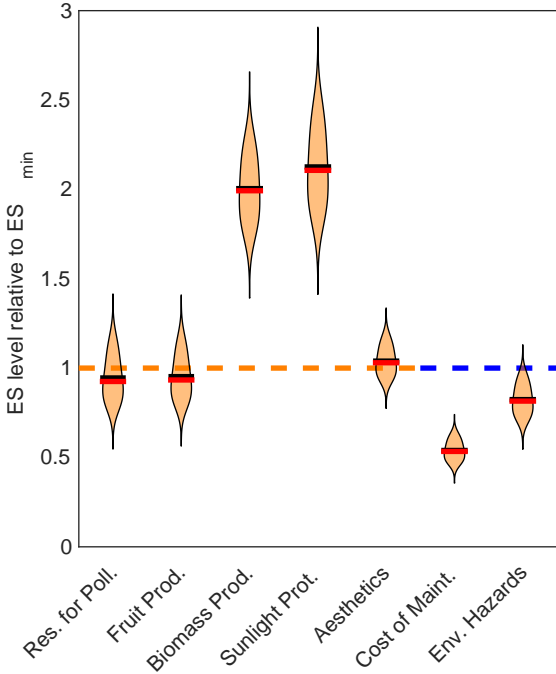

Climatic stress level 2

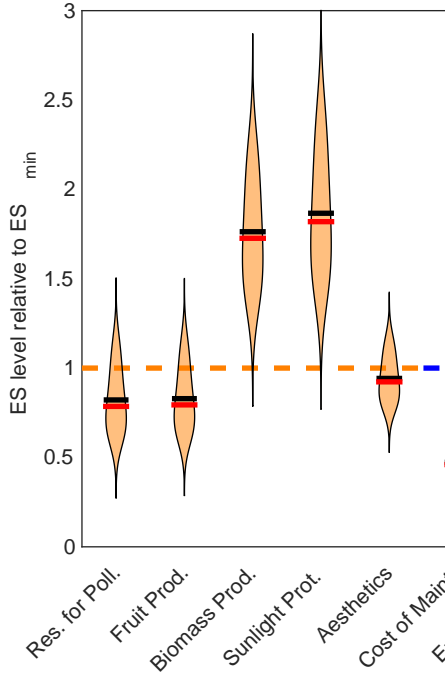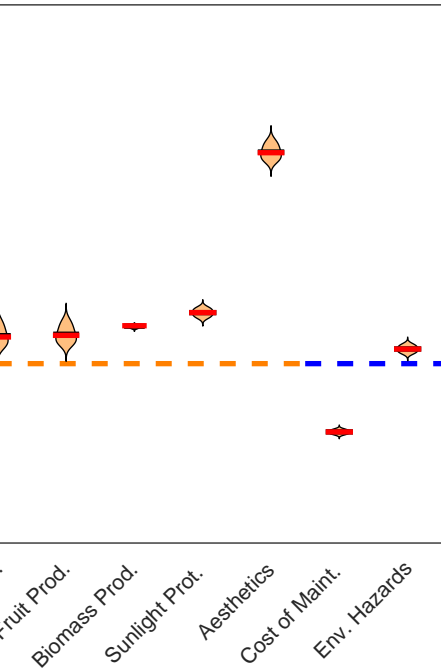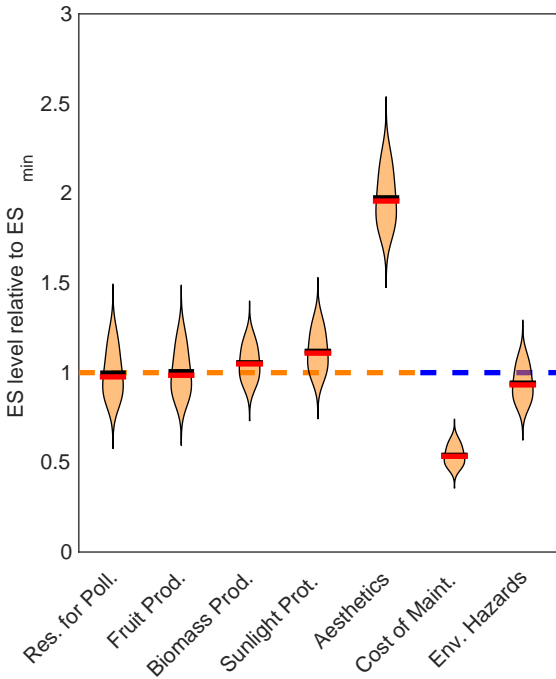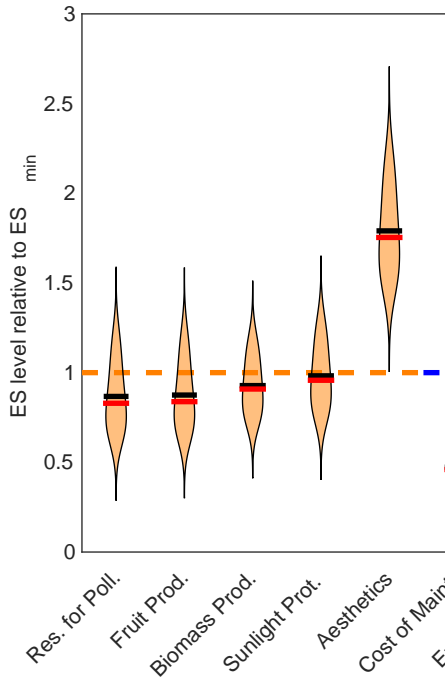

Supplement: FileS4.zip [file violin_full_scen_7.pdf › PACSEN-main/figures/figures_annexe/violin_full_scen_7.pdf]

No climatic stress

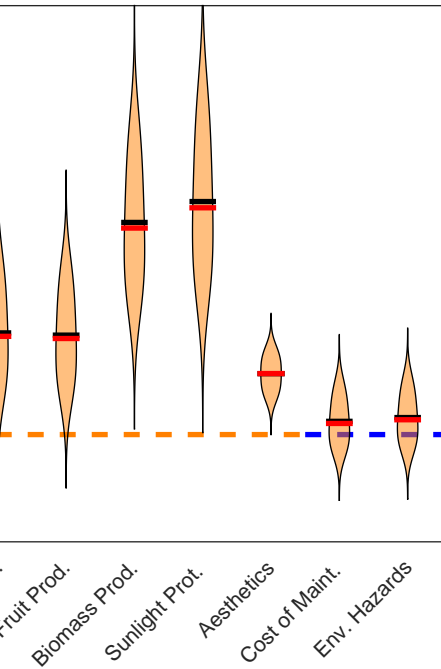

Climatic stress level 1

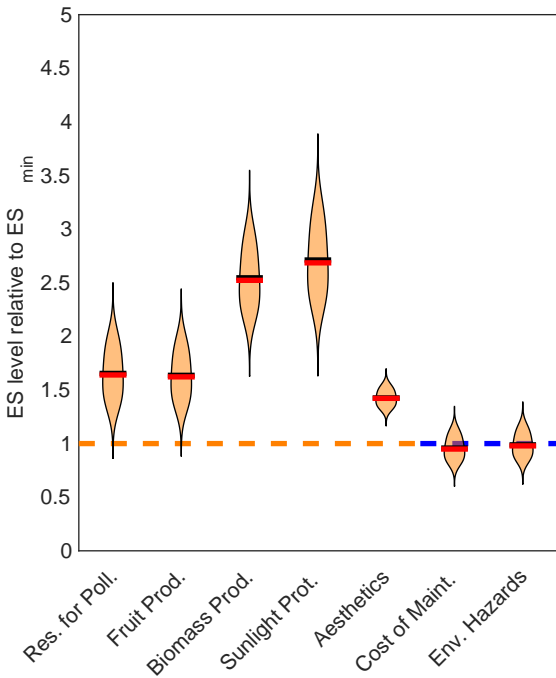

Climatic stress level 2

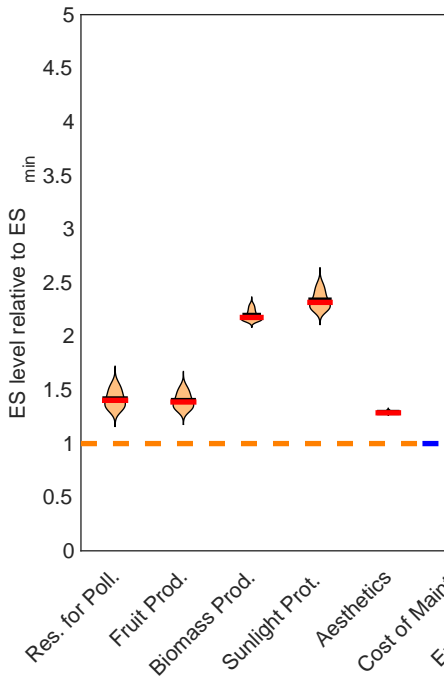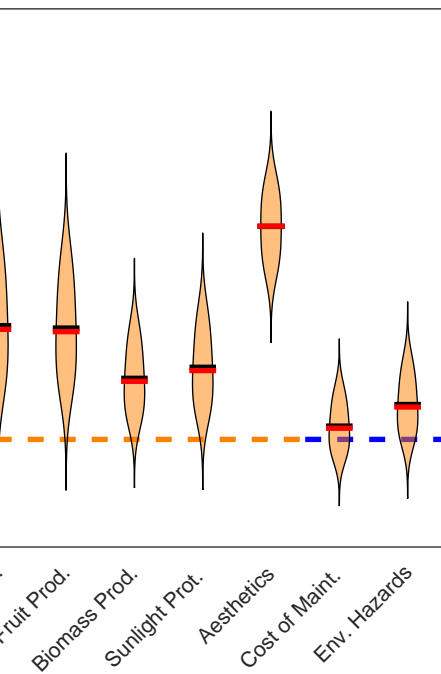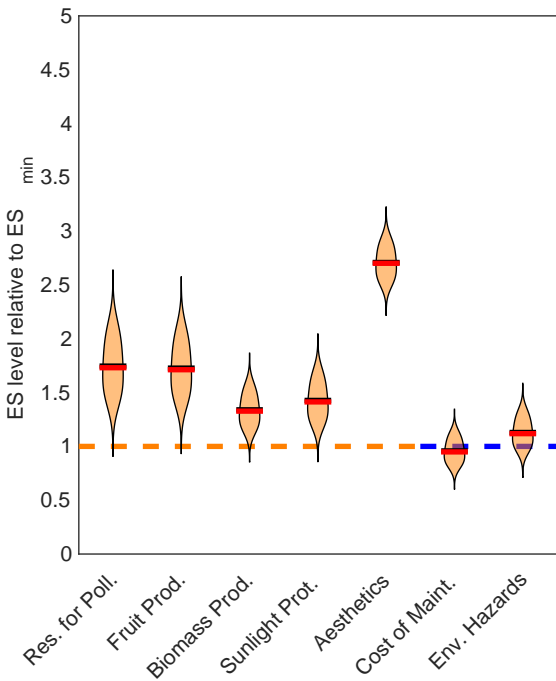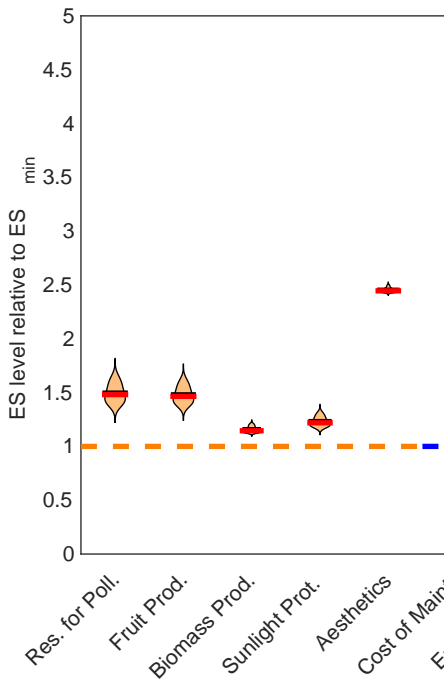

Supplement: FileS4.zip [file violin_full_scen_8.pdf › PACSEN-main/figures/figures_annexe/violin_full_scen_8.pdf]

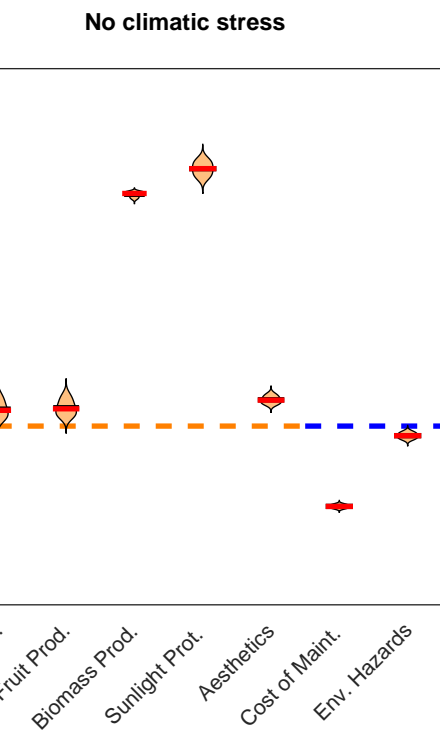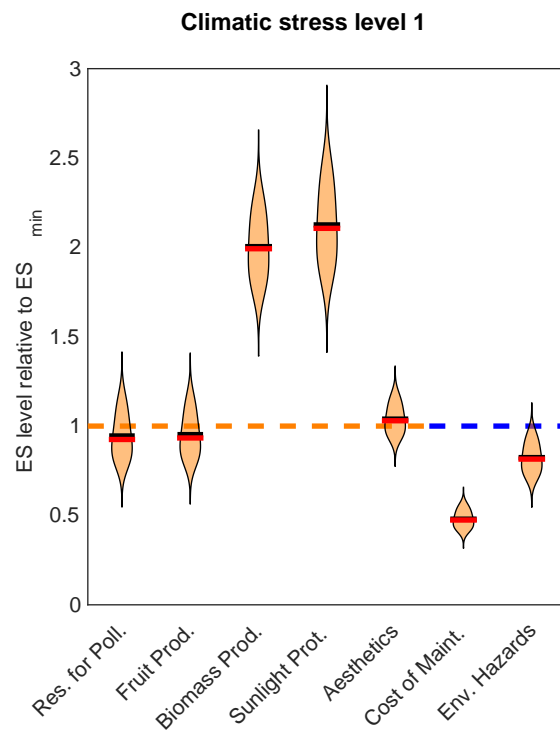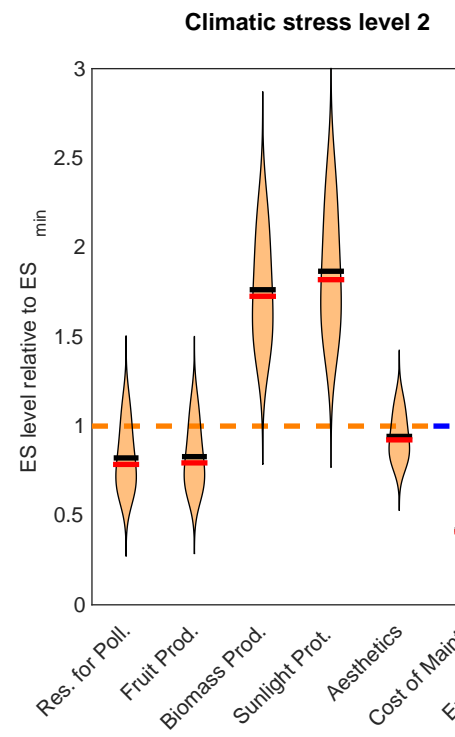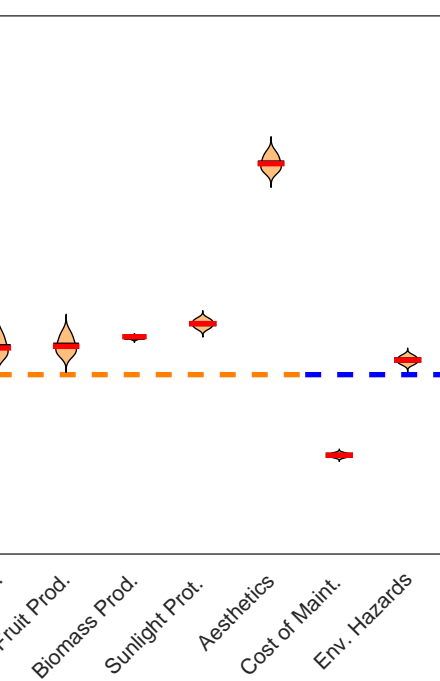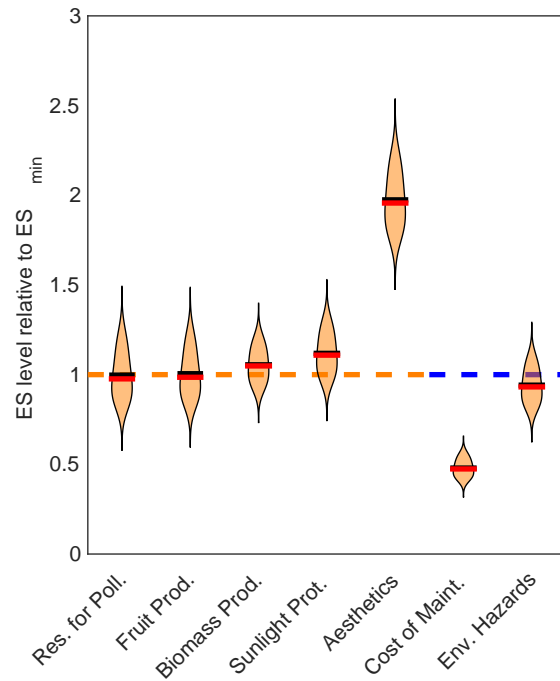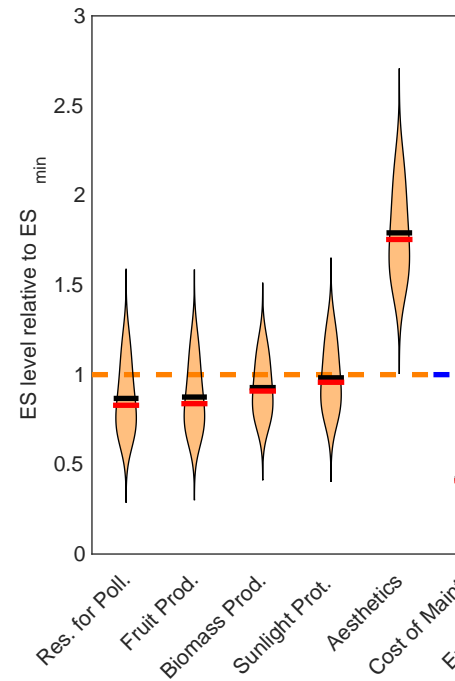

Supplement: FileS4.zip [file violin_full_scen_9.pdf › PACSEN-main/figures/figures_annexe/violin_full_scen_9.pdf]
